# Supplementary material for: Reemergence of Cholera in Haiti
Source: PubMed Central journal article supplement (PMC9901182; doi:10.1056/nejmc2213908), 2022-11-30
Supplement: NIHMS1862730-supplement-supplement.pdf [file NIHMS1862730-supplement-supplement.pdf]

## Appendix for “Reemergence of Cholera in Haiti”

|                                                                                                                                                      |    |
|------------------------------------------------------------------------------------------------------------------------------------------------------|----|
| Methods and Materials .....                                                                                                                          | 2  |
| Supplementary Table 1. <b>Representative antibiogram of <i>V. cholerae</i> isolates from the Laboratoire National de Santé Publique (LNSP)</b> ..... | 4  |
| Supplementary Table 2. <b>Isolates sequenced in this study and strain characteristics</b> .....                                                      | 5  |
| Supplementary Table 3. <b>Pathogenicity factors from strains in our study</b> .....                                                                  | 6  |
| Supplementary Figure 1. <b>Cholera toxin (CT) western blot analysis</b> .....                                                                        | 7  |
| Supplementary Table 4. <b>Toxigenic O1 <i>Vibrio cholerae</i> genomes and accessions used in Figure 1</b> .....                                      | 8  |
| References .....                                                                                                                                     | 56 |

## Methods and Materials

### *Strains and Growth Conditions*

Strain H22 was imported from Haiti with CDC PHS Permit No. 20221004-3616A. Clinical samples of *Vibrio cholerae* (VC) were streaked overnight on lysogeny broth (LB) agar (Difco) plates. Individual colonies were then subcultured into LB (Difco) overnight. For induction of cholera toxin, strains were grown in AKI medium (1.5% Bacto peptone, 0.5% sodium chloride, 0.4% yeast extract, 0.3% sodium bicarbonate) with four hours stationary followed by four hours of shaking<sup>1</sup>. All growth was performed at 37°C. Clinical isolates presented in this study are presented in Supplementary Table 1.

### *Cholera toxin analysis and serotyping*

Immunoblot analysis was performed as previously described<sup>2</sup>. Proteins were separated by SDS-PAGE using 4 to 12% NuPAGE Bis-Tris precast gels (Life Technologies) and transferred to nitrocellulose using an iBlot gel transfer device (Life Technologies). The prestained protein marker, SeeBlue (Invitrogen) was used as a molecular mass standard. Rabbit anti-CT polyclonal antibody (Abcam; catalog no. ab123129) and horseradish peroxidase (HRP)-linked anti-rabbit IgG were used as primary and secondary antibodies, respectively. Blots were developed with the SuperSignal West Pico Plus chemiluminescence substrate (Thermo Fisher) for five minutes and exposed in a ChemiDoc system (Bio-Rad Laboratories). This experiment was performed with three independent replicates. Serotyping was performed using slide agglutination with Ogawa- and Inaba-specific antisera (BD Difco).

### *Minimum inhibitory concentration (MIC)-assays*

For MIC assays, overnight cultures grown in LB were shifted into fresh LB at a final OD<sub>600</sub> of 0.02. Three-fold serial dilutions of antimicrobial agents were tested across the following range of concentrations: 100µg/ml to 0.000564503µg/ml. After 18 h incubation of growth at 37°C, OD<sub>600</sub> was measured. The MIC was defined as the minimum antimicrobial agent concentration which inhibited bacterial growth. Growth was defined by an at least four-fold increase of the OD<sub>600</sub> compared to a sterile control. All MICs were performed with four independent replicates.

### *Whole-genome Sequencing and Phylogenetic Analysis*

Genomic DNA (gDNA) was first isolated from *V. cholerae* strains using the GeneJet genomic DNA purification kit (Thermo Fisher). DNA was fragmented using a sonicator (Peak power 50, duty factor 10, cycles per burst 200, duration 90 seconds) (Covaris M220). Fragments were then prepared for short read sequencing via the NEBNext Ultra II DNA Library Prep Kit (NEB). Libraries were then sequenced on a NextSeq 550 (Illumina).

For phylogenetic analysis, genomes<sup>2-22</sup> (Supp. Table 4) were analyzed as previously published<sup>2,23</sup>. Raw reads were downloaded from the European Nucleotide Archive. For fully assembled genomes, pseudoreads of 100-bp overlapping reads were generated using either wgsim (<https://github.com/lh3/wgsim>) or fasta-to-fastq.pl ([https://github.com/ekg/fasta-to-fastq/blob/master/fasta to fastq.pl](https://github.com/ekg/fasta-to-fastq/blob/master/fasta%20to%20fastq.pl)). Reads were then mapped to the genome of N16961 (GenBank accession nos. LT907989 and LT907990), a seventh pandemic wave 1 isolate, with Snippy v4.6.0 (<https://github.com/tseemann/snippy>) using freebayes v1.3.6 (<https://github.com/freebayes/freebayes>) with a minimum read coverage of 4, minimum base quality of 13, a mapping quality of 60, and a requirement of 75% read concordance. Alignments

for previously published isolates were kindly provided previously by D. Domman (University of New Mexico) and alignments from Mexican isolates can be found in previously published work<sup>23</sup>. The known repeat region TLC-RS1-CTX was masked from the genome, as was the recombinogenic VSP-II region using Geneious (Biomatters). Recombinogenic sites were then further masked with Gubbins v3.3<sup>24</sup>, and a phylogenetic tree was assembled based on the remaining 8,191 polymorphisms with RAxML v8.212<sup>25</sup> using a general time reversible with gamma rate heterogeneity (GTRGAMMA) model and 100 bootstraps. The resulting tree was visualized in iTOL v6<sup>26</sup>.

Contigs were assembled using SPAdes v3.15.5<sup>27</sup> (filtering contigs based on length > 500 bp and coverage > 4) and annotated using Geneious v2022.2 (Biomatters) from the H1 genome (aka KW3, Genbank accession no. GCA\_001318185.1, 95% similarity). Alleles of interest were identified through either direct mapping of reads to the H1 or N16961 genomes via Geneious using default settings or through BLAST<sup>28</sup> of the N16961 allele on assembled genomes.

#### *IBC Approval*

The Waldor lab has IBC approval (2011B000082) to work with pathogenic *V. cholerae* and a CDC permit (20221004-3616A) to import *V. cholerae* from Haiti.

#### **Data Availability**

Sequencing from this study is available at GenBank BioProject PRJNA903489.

**Supplementary Table 1**  
**Representative antibiogram of *V. cholerae* isolates from the Laboratoire National de Santé Publique (LNSP).**

| <b>Antibiotic</b>             | MIC<br>( $\mu\text{g/mL}$ ) | Interpretation | Kirby-Bauer<br>(Interpretation) |
|-------------------------------|-----------------------------|----------------|---------------------------------|
| Ampicillin 10 mcg             | 16                          | I              |                                 |
| Trimethoprim/Sulfamethoxazole | $\geq 320$                  | R              |                                 |
| Tetracycline                  |                             |                | S                               |
| Cefoxitin                     | 16                          | I              |                                 |
| Ceftazidime                   | 0.5                         | S              |                                 |
| Imipenem                      | 2                           | S              |                                 |
| Piperacillin/Tazobactam       | $\leq 4$                    | S              |                                 |
| Cefuroxime                    | $\leq 1$                    |                |                                 |
| Azithromycin                  | 0.4                         |                | S                               |

**Supplementary Table 2**  
**Isolates sequenced in this study and strain characteristics.**

| <b>Metadata</b>                          | <b>D1</b>         | <b>D2</b>         | <b>D3</b>         | <b>D4</b>         | <b>H22</b>            | <b>H1</b>       |
|------------------------------------------|-------------------|-------------------|-------------------|-------------------|-----------------------|-----------------|
| <b>Date of isolation</b>                 | 10/31/2021        | 01/12/2022        | 03/23/2022        | 03/30/2022        | 09/30/2022            | 2010            |
| <b>Location of isolation</b>             | Dhaka, Bangladesh | Dhaka, Bangladesh | Dhaka, Bangladesh | Dhaka, Bangladesh | Port-au-Prince, Haiti | Haiti           |
| <b>Serotype</b>                          | Inaba             | Inaba             | Inaba             | Ogawa             | Ogawa                 | Ogawa           |
| <b>GenBank accession</b>                 | SRR22351616       | SRR22351615       | SRR22351614       | SRR22351613       | SRR22351617           | GCA_001318185.1 |
| <b>MIC</b>                               |                   |                   |                   |                   |                       |                 |
| Ciprofloxacin                            | 0.4               | 0.4               | 0.4               | 0.4               | 0.4                   | 0.4             |
| Sulfamethoxazole                         | >100              | >100              | >100              | >100              | >100                  | >100            |
| Trimethoprim                             | 100               | >100              | >100              | 100               | >100                  | >100            |
| Doxycycline                              | 0.1               | 0.1               | 0.1               | 0.1               | 0.1                   | 0.1             |
| Ceftriaxone                              | 0.02              | 0.02              | 0.02              | 0.03              | 0.02                  | 0.02            |
| Tetracycline                             | 0.4               | 0.4               | 0.4               | 0.4               | 0.4                   | 0.4             |
| Erythromycin                             | 4                 | 4                 | 4                 | 4                 | 4                     | 4               |
| Trimethoprim:<br>Sulfamethoxazole<br>1:5 | >100              | >100              | >100              | >100              | >100                  | >100            |
| Azithromycin                             | 0.4               | 0.4               | 0.4               | 0.4               | 0.4                   | 0.4             |
| Gentamicin                               | 11                | 11                | 11                | 11                | 33                    | 33              |

**Supplementary Table 3**

**Pathogenicity factors from strains in our study.** Changes to alleles are called with reference to the N16961 genome.

| <b>Gene</b>  | <b>D1</b>                               | <b>D2</b>                               | <b>D3</b>                               | <b>D4</b>                               | <b>H22</b>                              | <b>H1</b>                               |
|--------------|-----------------------------------------|-----------------------------------------|-----------------------------------------|-----------------------------------------|-----------------------------------------|-----------------------------------------|
| <i>wbeT</i>  | Tn insertion<br>(c.324)                 | Tn insertion<br>(c.324)                 | Tn insertion<br>(c.324)                 | Intact                                  | Intact                                  | Intact                                  |
| <i>ctxB</i>  | ctxB7                                   | ctxB7                                   | ctxB7                                   | ctxB7                                   | ctxB7                                   | ctxB7                                   |
| <i>tcpA</i>  | c.A266>G                                | c.A266>G                                | c.A266>G                                | c.A266>G                                | c.A266>G                                | c.A266>G                                |
| <i>vspII</i> | Del<br>VC_0495-<br>VC_0512::I<br>SVch4) | Del<br>VC_0495-<br>VC_0512::I<br>SVch4) | Del<br>VC_0495-<br>VC_0512::I<br>SVch4) | Del<br>VC_0495-<br>VC_0512::I<br>SVch4) | Del<br>VC_0495-<br>VC_0512::I<br>SVch4) | Del<br>VC_0495-<br>VC_0512::I<br>SVch4) |

**Supplementary Figure 1**

**Cholera toxin (CT) western blot analysis.** Shown is a representative immunoblot loaded with equal amounts of sterile-filtered supernatants of AKI-grown D1 (lane 1), D2 (lane 2), D3 (lane 3), D4 (lane 4), H22 (lane 5) and H1 (lane 6). The sizes of the A and B subunit (A and B) of CT are indicated by arrows on the right. Lines to the left indicate the molecular masses of the protein standards in kDa. The gap in between D4 and H22 contained samples not analyzed for this study.

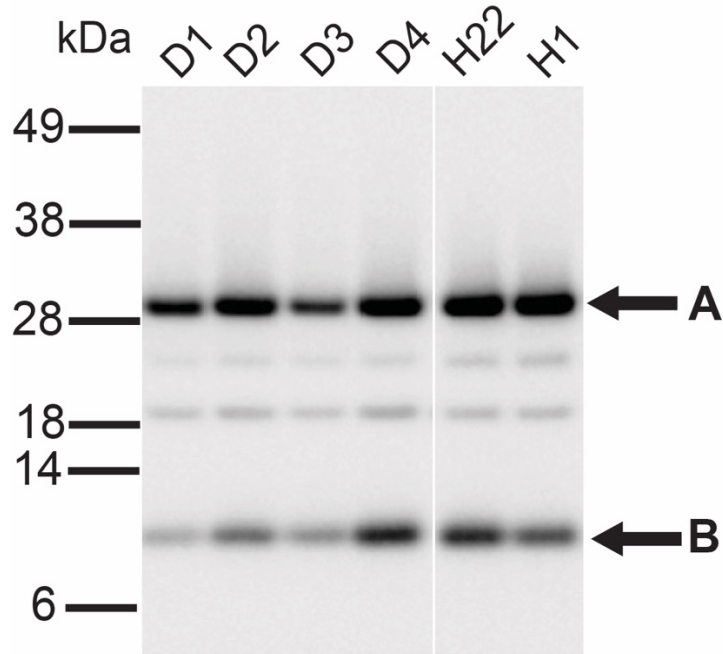

| Isolate name | Year | Country    | Continent     | EBI-ENA accession no. | Sequence ID | GenBank accession no. | Source                                      |
|--------------|------|------------|---------------|-----------------------|-------------|-----------------------|---------------------------------------------|
| 7994         | 2009 | India      | Asia          | ERR351210             | ERR351210   |                       | Abd El Ghany et al. PLoS Negl Trop Dis 2014 |
| 7772         | 2009 | India      | Asia          | ERR351208             | ERR351208   |                       | Abd El Ghany et al. PLoS Negl Trop Dis 2014 |
| 7683         | 2009 | India      | Asia          | ERR351207             | ERR351207   |                       | Abd El Ghany et al. PLoS Negl Trop Dis 2014 |
| 6801         | 2009 | India      | Asia          | ERR351206             | ERR351206   |                       | Abd El Ghany et al. PLoS Negl Trop Dis 2014 |
| 6734         | 2009 | India      | Asia          | ERR351205             | ERR351205   |                       | Abd El Ghany et al. PLoS Negl Trop Dis 2014 |
| 6557         | 2009 | India      | Asia          | ERR351203             | ERR351203   |                       | Abd El Ghany et al. PLoS Negl Trop Dis 2014 |
| 6259         | 2009 | India      | Asia          | ERR351199             | ERR351199   |                       | Abd El Ghany et al. PLoS Negl Trop Dis 2014 |
| 6016         | 2009 | India      | Asia          | ERR351193             | ERR351193   |                       | Abd El Ghany et al. PLoS Negl Trop Dis 2014 |
| 5663         | 2009 | India      | Asia          | ERR351192             | ERR351192   |                       | Abd El Ghany et al. PLoS Negl Trop Dis 2014 |
| 5417         | 2009 | India      | Asia          | ERR351191             | ERR351191   |                       | Abd El Ghany et al. PLoS Negl Trop Dis 2014 |
| 5286         | 2009 | India      | Asia          | ERR351188             | ERR351188   |                       | Abd El Ghany et al. PLoS Negl Trop Dis 2014 |
| 5202         | 2009 | India      | Asia          | ERR351185             | ERR351185   |                       | Abd El Ghany et al. PLoS Negl Trop Dis 2014 |
| 5185         | 2009 | India      | Asia          | ERR351179             | ERR351179   |                       | Abd El Ghany et al. PLoS Negl Trop Dis 2014 |
| 5046         | 2009 | India      | Asia          | ERR351175             | ERR351175   |                       | Abd El Ghany et al. PLoS Negl Trop Dis 2014 |
| 4966         | 2009 | India      | Asia          | ERR351174             | ERR351174   |                       | Abd El Ghany et al. PLoS Negl Trop Dis 2014 |
| UG026        | 2015 | Uganda     | Africa        |                       | UG026       | SAMN08744332          | Bwire et al. PLoS Negl Trop Dis 2018        |
| UG010        | 2016 | Uganda     | Africa        |                       | UG010       | SAMN08744330          | Bwire et al. PLoS Negl Trop Dis 2018        |
| UG020        | 2016 | Uganda     | Africa        |                       | UG020       | SAMN08744331          | Bwire et al. PLoS Negl Trop Dis 2018        |
| H1           | 2010 | Haiti      | North America |                       | H1          | GCA_00027564.5.1      | Chin et al. NEJM 2011                       |
| MJ1236       | 1994 | Bangladesh | Asia          |                       | MJ1236      | CP001485/CP001486     | Chun et al. Proc Natl Acad Sci USA 2009     |
| CIRS101      | 2002 | Bangladesh | Asia          |                       | CIRS101     | ACVW00000000          | Chun et al. Proc Natl Acad Sci USA 2009     |
| MO10         | 1992 | India      | Asia          |                       | MO10        | AAKF03000000          | Chun et al. Proc Natl Acad Sci USA 2009     |
| RC9          | 1985 | Kenya      | Africa        |                       | RC9         | ACHX00000000          | Chun et al. Proc Natl Acad Sci USA 2009     |



|                          |      |            |               |           |           |              |                                         |
|--------------------------|------|------------|---------------|-----------|-----------|--------------|-----------------------------------------|
| <b>B33</b>               | 2004 | Mozambique | Africa        |           | B33       | ACHZ00000000 | Chun et al. Proc Natl Acad Sci USA 2009 |
| <b>V01-CDC</b>           | 1991 | Chile      | South America | ERR576950 | ERR576950 |              | Didelot et al. PLoS Genet 2015          |
| <b>1525-CDC</b>          | 1994 | China      | Asia          | ERR579986 | ERR579986 |              | Didelot et al. PLoS Genet 2015          |
| <b>2578-CDC</b>          | 1985 | China      | Asia          | ERR579919 | ERR579919 |              | Didelot et al. PLoS Genet 2015          |
| <b>200106-CDC</b>        | 2001 | China      | Asia          | ERR579313 | ERR579313 |              | Didelot et al. PLoS Genet 2015          |
| <b>129-CDC</b>           | 1994 | China      | Asia          | ERR579311 | ERR579311 |              | Didelot et al. PLoS Genet 2015          |
| <b>9-CDC</b>             | 2001 | China      | Asia          | ERR579309 | ERR579309 |              | Didelot et al. PLoS Genet 2015          |
| <b>SC1998_098-1-CDC</b>  | 1998 | China      | Asia          | ERR579114 | ERR579114 |              | Didelot et al. PLoS Genet 2015          |
| <b>JX1998-1306-1-CDC</b> | 1998 | China      | Asia          | ERR579093 | ERR579093 |              | Didelot et al. PLoS Genet 2015          |
| <b>SC1998_242-1-CDC</b>  | 1998 | China      | Asia          | ERR579092 | ERR579092 |              | Didelot et al. PLoS Genet 2015          |
| <b>SC2000-CDC</b>        | 2000 | China      | Asia          | ERR579091 | ERR579091 |              | Didelot et al. PLoS Genet 2015          |
| <b>VC2248-1-CDC</b>      | 2008 | China      | Asia          | ERR579090 | ERR579090 |              | Didelot et al. PLoS Genet 2015          |
| <b>VC2454-CDC</b>        | 2005 | China      | Asia          | ERR579089 | ERR579089 |              | Didelot et al. PLoS Genet 2015          |
| <b>1283-CDC</b>          | 1984 | China      | Asia          | ERR579088 | ERR579088 |              | Didelot et al. PLoS Genet 2015          |
| <b>132-CDC</b>           | 1978 | China      | Asia          | ERR579087 | ERR579087 |              | Didelot et al. PLoS Genet 2015          |
| <b>143-CDC</b>           | 2001 | China      | Asia          | ERR579086 | ERR579086 |              | Didelot et al. PLoS Genet 2015          |
| <b>147-CDC</b>           | 2002 | China      | Asia          | ERR579085 | ERR579085 |              | Didelot et al. PLoS Genet 2015          |
| <b>1551-CDC</b>          | 1979 | China      | Asia          | ERR579083 | ERR579083 |              | Didelot et al. PLoS Genet 2015          |
| <b>1575-CDC</b>          | 1990 | China      | Asia          | ERR579082 | ERR579082 |              | Didelot et al. PLoS Genet 2015          |
| <b>1583-CDC</b>          | 1991 | China      | Asia          | ERR579081 | ERR579081 |              | Didelot et al. PLoS Genet 2015          |
| <b>1593-CDC</b>          | 1992 | China      | Asia          | ERR579080 | ERR579080 |              | Didelot et al. PLoS Genet 2015          |
| <b>1605-CDC</b>          | 1993 | China      | Asia          | ERR579079 | ERR579079 |              | Didelot et al. PLoS Genet 2015          |
| <b>1627-CDC</b>          | 1997 | China      | Asia          | ERR579078 | ERR579078 |              | Didelot et al. PLoS Genet 2015          |
| <b>1909-CDC</b>          | 1998 | China      | Asia          | ERR579077 | ERR579077 |              | Didelot et al. PLoS Genet 2015          |

|                 |      |       |      |           |           |  |                                |
|-----------------|------|-------|------|-----------|-----------|--|--------------------------------|
| <b>1944-CDC</b> | 2000 | China | Asia | ERR579076 | ERR579076 |  | Didelot et al. PLoS Genet 2015 |
| <b>2255-CDC</b> | 2008 | China | Asia | ERR579075 | ERR579075 |  | Didelot et al. PLoS Genet 2015 |
| <b>2308-CDC</b> | 1978 | China | Asia | ERR579074 | ERR579074 |  | Didelot et al. PLoS Genet 2015 |
| <b>2530-CDC</b> | 1996 | China | Asia | ERR579073 | ERR579073 |  | Didelot et al. PLoS Genet 2015 |
| <b>2574-CDC</b> | 1980 | China | Asia | ERR579072 | ERR579072 |  | Didelot et al. PLoS Genet 2015 |
| <b>2580-CDC</b> | 1989 | China | Asia | ERR579070 | ERR579070 |  | Didelot et al. PLoS Genet 2015 |
| <b>2605-CDC</b> | 1998 | China | Asia | ERR579069 | ERR579069 |  | Didelot et al. PLoS Genet 2015 |
| <b>2657-CDC</b> | 1995 | China | Asia | ERR579068 | ERR579068 |  | Didelot et al. PLoS Genet 2015 |
| <b>2710-CDC</b> | 1986 | China | Asia | ERR579067 | ERR579067 |  | Didelot et al. PLoS Genet 2015 |
| <b>2744-CDC</b> | 1962 | China | Asia | ERR579066 | ERR579066 |  | Didelot et al. PLoS Genet 2015 |
| <b>2752-CDC</b> | 1981 | China | Asia | ERR579065 | ERR579065 |  | Didelot et al. PLoS Genet 2015 |
| <b>2757-CDC</b> | 1987 | China | Asia | ERR579064 | ERR579064 |  | Didelot et al. PLoS Genet 2015 |
| <b>2783-CDC</b> | 1964 | China | Asia | ERR579063 | ERR579063 |  | Didelot et al. PLoS Genet 2015 |
| <b>2833-CDC</b> | 1979 | China | Asia | ERR579062 | ERR579062 |  | Didelot et al. PLoS Genet 2015 |
| <b>2848-CDC</b> | 1988 | China | Asia | ERR579061 | ERR579061 |  | Didelot et al. PLoS Genet 2015 |
| <b>2865-CDC</b> | 1961 | China | Asia | ERR579060 | ERR579060 |  | Didelot et al. PLoS Genet 2015 |
| <b>2873-CDC</b> | 1961 | China | Asia | ERR579059 | ERR579059 |  | Didelot et al. PLoS Genet 2015 |
| <b>2881-CDC</b> | 1961 | China | Asia | ERR579058 | ERR579058 |  | Didelot et al. PLoS Genet 2015 |
| <b>2894-CDC</b> | 1961 | China | Asia | ERR579057 | ERR579057 |  | Didelot et al. PLoS Genet 2015 |
| <b>2914-CDC</b> | 1966 | China | Asia | ERR579056 | ERR579056 |  | Didelot et al. PLoS Genet 2015 |
| <b>2921-CDC</b> | 1962 | China | Asia | ERR579055 | ERR579055 |  | Didelot et al. PLoS Genet 2015 |
| <b>2957-CDC</b> | 1964 | China | Asia | ERR579054 | ERR579054 |  | Didelot et al. PLoS Genet 2015 |
| <b>2981-CDC</b> | 1965 | China | Asia | ERR579053 | ERR579053 |  | Didelot et al. PLoS Genet 2015 |
| <b>3014-CDC</b> | 1969 | China | Asia | ERR579052 | ERR579052 |  | Didelot et al. PLoS Genet 2015 |

|                     |      |       |      |           |           |  |                                |
|---------------------|------|-------|------|-----------|-----------|--|--------------------------------|
| <b>3024-CDC</b>     | 1973 | China | Asia | ERR579051 | ERR579051 |  | Didelot et al. PLoS Genet 2015 |
| <b>3075-CDC</b>     | 1974 | China | Asia | ERR579050 | ERR579050 |  | Didelot et al. PLoS Genet 2015 |
| <b>3270-CDC</b>     | 1977 | China | Asia | ERR579049 | ERR579049 |  | Didelot et al. PLoS Genet 2015 |
| <b>3289-CDC</b>     | 1978 | China | Asia | ERR577143 | ERR577143 |  | Didelot et al. PLoS Genet 2015 |
| <b>3304-CDC</b>     | 1979 | China | Asia | ERR577142 | ERR577142 |  | Didelot et al. PLoS Genet 2015 |
| <b>3497-CDC</b>     | 1980 | China | Asia | ERR577141 | ERR577141 |  | Didelot et al. PLoS Genet 2015 |
| <b>3538-CDC</b>     | 1981 | China | Asia | ERR577140 | ERR577140 |  | Didelot et al. PLoS Genet 2015 |
| <b>3564-CDC</b>     | 1982 | China | Asia | ERR577139 | ERR577139 |  | Didelot et al. PLoS Genet 2015 |
| <b>3595-CDC</b>     | 1983 | China | Asia | ERR576996 | ERR576996 |  | Didelot et al. PLoS Genet 2015 |
| <b>3626-CDC</b>     | 1983 | China | Asia | ERR576995 | ERR576995 |  | Didelot et al. PLoS Genet 2015 |
| <b>3633-CDC</b>     | 1984 | China | Asia | ERR576988 | ERR576988 |  | Didelot et al. PLoS Genet 2015 |
| <b>3735-CDC</b>     | 1988 | China | Asia | ERR576987 | ERR576987 |  | Didelot et al. PLoS Genet 2015 |
| <b>4039-CDC</b>     | 1993 | China | Asia | ERR576986 | ERR576986 |  | Didelot et al. PLoS Genet 2015 |
| <b>4070-CDC</b>     | 1994 | China | Asia | ERR576985 | ERR576985 |  | Didelot et al. PLoS Genet 2015 |
| <b>4210-CDC</b>     | 1999 | China | Asia | ERR576984 | ERR576984 |  | Didelot et al. PLoS Genet 2015 |
| <b>63244-CDC</b>    | 1963 | China | Asia | ERR576980 | ERR576980 |  | Didelot et al. PLoS Genet 2015 |
| <b>642345-CDC</b>   | 1964 | China | Asia | ERR576979 | ERR576979 |  | Didelot et al. PLoS Genet 2015 |
| <b>93284-CDC</b>    | 1993 | China | Asia | ERR576977 | ERR576977 |  | Didelot et al. PLoS Genet 2015 |
| <b>936-CDC</b>      | 1998 | China | Asia | ERR576976 | ERR576976 |  | Didelot et al. PLoS Genet 2015 |
| <b>956-CDC</b>      | 2001 | China | Asia | ERR576975 | ERR576975 |  | Didelot et al. PLoS Genet 2015 |
| <b>AHV1003-CDC</b>  | 2010 | China | Asia | ERR576974 | ERR576974 |  | Didelot et al. PLoS Genet 2015 |
| <b>D118-CDC</b>     | 1961 | China | Asia | ERR576972 | ERR576972 |  | Didelot et al. PLoS Genet 2015 |
| <b>GD196110-CDC</b> | 1961 | China | Asia | ERR576971 | ERR576971 |  | Didelot et al. PLoS Genet 2015 |
| <b>V011506-CDC</b>  | 2001 | China | Asia | ERR576951 | ERR576951 |  | Didelot et al. PLoS Genet 2015 |

|                    |      |               |               |            |                         |  |                                |
|--------------------|------|---------------|---------------|------------|-------------------------|--|--------------------------------|
| <b>6310-CDC</b>    | 1961 | Indonesia     | Asia          | ERR576983  | ERR576983               |  | Didelot et al. PLoS Genet 2015 |
| <b>6311-CDC</b>    | 1961 | Indonesia     | Asia          | ERR576982  | ERR576982               |  | Didelot et al. PLoS Genet 2015 |
| <b>6312-CDC</b>    | 1961 | Indonesia     | Asia          | ERR576981  | ERR576981               |  | Didelot et al. PLoS Genet 2015 |
| <b>863-CDC</b>     | 1986 | Mauritania    | Africa        | ERR576978  | ERR576978               |  | Didelot et al. PLoS Genet 2015 |
| <b>X190-CDC</b>    | 1991 | Peru          | South America | ERR580006  | ERR580006               |  | Didelot et al. PLoS Genet 2015 |
| <b>C6706-CDC</b>   | 1991 | Peru          | South America | ERR576973  | ERR576973               |  | Didelot et al. PLoS Genet 2015 |
| <b>T21-CDC</b>     | 1990 | Thailand      | Asia          | ERR576970  | ERR576970               |  | Didelot et al. PLoS Genet 2015 |
| <b>CNRVC140126</b> | 1991 | Bolivia       | South America | ERR976497  | 16244_7_46              |  | Domman et al. Science 2017     |
| <b>CNRVC140125</b> | 1992 | Bolivia       | South America | ERR976496  | 16244_7_45              |  | Domman et al. Science 2017     |
| <b>CNRVC140124</b> | 1992 | Bolivia       | South America | ERR976495  | 16244_7_44              |  | Domman et al. Science 2017     |
| <b>CNRVC140123</b> | 1992 | Bolivia       | South America | ERR976494  | 16244_7_43              |  | Domman et al. Science 2017     |
| <b>CNRVC140117</b> | 1991 | Bolivia       | South America | ERR976488  | 16244_7_37              |  | Domman et al. Science 2017     |
| <b>CNRVC140122</b> | 1992 | Brazil        | South America | ERR976493  | 16244_7_42              |  | Domman et al. Science 2017     |
| <b>CNRVC140121</b> | 1991 | Brazil        | South America | ERR976492  | 16244_7_41              |  | Domman et al. Science 2017     |
| <b>CNRVC140118</b> | 1991 | Brazil        | South America | ERR976489  | 16244_7_38              |  | Domman et al. Science 2017     |
| <b>CNRVC950014</b> | 1995 | Ecuador       | South America | ERR1879579 | CNRVC950014_ATGTCA_L002 |  | Domman et al. Science 2017     |
| <b>CNRVC940183</b> | 1994 | French Guiana | South America | ERR1879578 | CNRVC940183_AGTTC_L002  |  | Domman et al. Science 2017     |
| <b>CNRVC930025</b> | 1993 | French Guiana | South America | ERR1879554 | CNRVC930025_TCCCGA_L001 |  | Domman et al. Science 2017     |
| <b>54267_1994</b>  | 1994 | Mexico        | North America | ERR163241  | 8014_8_9                |  | Domman et al. Science 2017     |
| <b>33297_1993</b>  | 1993 | Mexico        | North America | ERR163240  | 8014_8_8                |  | Domman et al. Science 2017     |
| <b>60483_1995</b>  | 1995 | Mexico        | North America | ERR163244  | 8014_8_12               |  | Domman et al. Science 2017     |
| <b>60452_1995</b>  | 1995 | Mexico        | North America | ERR163243  | 8014_8_11               |  | Domman et al. Science 2017     |
| <b>54328_1994</b>  | 1994 | Mexico        | North America | ERR163242  | 8014_8_10               |  | Domman et al. Science 2017     |
| <b>85</b>          | 2000 | Mexico        | North America | ERR108522  | 7138_2_7                |  | Domman et al. Science 2017     |

|                   |      |            |               |                         |                   |  |                                           |
|-------------------|------|------------|---------------|-------------------------|-------------------|--|-------------------------------------------|
| <b>54</b>         | 1999 | Mexico     | North America | ERR108518               | 7138_2_3          |  | Domman et al. Science 2017                |
| <b>688</b>        | 2006 | Mexico     | North America | ERR108537               | 7138_2_22         |  | Domman et al. Science 2017                |
| <b>838</b>        | 1999 | Mexico     | North America | ERR108517               | 7138_2_2          |  | Domman et al. Science 2017                |
| <b>82</b>         | 1998 | Mexico     | North America | ERR108516               | 7138_2_1          |  | Domman et al. Science 2017                |
| <b>87662</b>      | 1993 | Mexico     | North America | ERR044786               | 6437_7_9          |  | Domman et al. Science 2017                |
| <b>87667</b>      | 1993 | Mexico     | North America | ERR044785               | 6437_7_8          |  | Domman et al. Science 2017                |
| <b>116075</b>     | 1992 | Mexico     | North America | ERR044783               | 6437_7_6          |  | Domman et al. Science 2017                |
| <b>116073</b>     | 1991 | Mexico     | North America | ERR044781               | 6437_7_4          |  | Domman et al. Science 2017                |
| <b>116072</b>     | 1991 | Mexico     | North America | ERR044779               | 6437_7_2          |  | Domman et al. Science 2017                |
| <b>95430</b>      | 1997 | Mexico     | North America | ERR044791               | 6437_7_14         |  | Domman et al. Science 2017                |
| <b>Mex6</b>       | 1992 | Mexico     | North America | ERR042754               | 6353_8_3          |  | Domman et al. Science 2017                |
| <b>H_3687</b>     | 2013 | Mexico     | North America | ERR466829               | 12005_1_11        |  | Domman et al., Science 2017               |
| <b>H_4084</b>     | 2013 | Mexico     | North America | ERR466834               | 12005_1_16        |  | Domman et al., Science 2017               |
| <b>H_4090</b>     | 2013 | Mexico     | North America | ERR466835               | 12005_1_17        |  | Domman et al., Science 2017               |
| <b>H_4412</b>     | 2013 | Mexico     | North America | ERR466846               | 12014_1_28        |  | Domman et al., Science 2017               |
| <b>H_4659</b>     | 2013 | Mexico     | North America | ERR471121               | 12022_1_32        |  | Domman et al., Science 2017               |
| <b>H_6152</b>     | 2013 | Mexico     | North America | ERR471128               | 12022_1_39        |  | Domman et al., Science 2017               |
| <b>ZChol</b>      | 2016 | Zambia     | Africa        | SRR17283076/SRR17283077 | ZChol             |  | Fakoya et al. mBio 2022                   |
| <b>S152</b>       | 2003 | Mozambique | Africa        | ERS1938085              | 152_L008_R1       |  | Garrine et al. PLoS Neglect Trop Dis 2017 |
| <b>S121</b>       | 2003 | Mozambique | Africa        | ERS1938079              | 121_L008_R1       |  | Garrine et al. PLoS Neglect Trop Dis 2017 |
| <b>S1020229_6</b> | 2010 | Mozambique | Africa        | ERS1938072              | 1020229_6_L007_R1 |  | Garrine et al. PLoS Neglect Trop Dis 2017 |
| <b>S1019828_5</b> | 2010 | Mozambique | Africa        | ERS1938068              | 1019828_5_L007_R1 |  | Garrine et al. PLoS Neglect Trop Dis 2017 |
| <b>S0074</b>      | 2003 | Mozambique | Africa        | ERS1938060              | 0074_L002_R1      |  | Garrine et al. PLoS Neglect Trop Dis 2017 |
| <b>S0035</b>      | 2002 | Mozambique | Africa        | ERS1938059              | 0035_L008_R1      |  | Garrine et al. PLoS Neglect Trop Dis 2017 |

|                |      |            |               |            |                                               |                   |                                           |
|----------------|------|------------|---------------|------------|-----------------------------------------------|-------------------|-------------------------------------------|
| <b>S0034</b>   | 2002 | Mozambique | Africa        | ERS1938058 | 0034_L008_R1                                  |                   | Garrine et al. PLoS Neglect Trop Dis 2017 |
| <b>S0014</b>   | 2002 | Mozambique | Africa        | ERS1938051 | 0014_L008_R1                                  |                   | Garrine et al. PLoS Neglect Trop Dis 2017 |
| <b>HC_23A1</b> | 2010 | Haiti      | North America | SRR135546  | SRR135546                                     |                   | Hasan et al. PNAS 2012                    |
| <b>HC_49A2</b> | 2010 | Haiti      | North America | SRR135544  | SRR135544                                     |                   | Hasan et al. PNAS 2012                    |
| <b>N16961</b>  | 1975 | Bangladesh | Asia          |            | Vibrio_cholerae_O1_biovar_eltor_str_N16961_v2 | LT907989/LT907990 | Heidelberg et al. Nature 2000             |
| <b>VC-26</b>   | 2010 | Nepal      | Asia          | SRR308727  | SRR308727                                     |                   | Hendriksen et al. Mbio 2011               |
| <b>VC-26</b>   | 2010 | Nepal      | Asia          | SRR308726  | SRR308726                                     |                   | Hendriksen et al. Mbio 2011               |
| <b>VC-22</b>   | 2010 | Nepal      | Asia          | SRR308725  | SRR308725                                     |                   | Hendriksen et al. Mbio 2011               |
| <b>VC-21</b>   | 2010 | Nepal      | Asia          | SRR308724  | SRR308724                                     |                   | Hendriksen et al. Mbio 2011               |
| <b>VC-20</b>   | 2010 | Nepal      | Asia          | SRR308723  | SRR308723                                     |                   | Hendriksen et al. Mbio 2011               |
| <b>VC-19</b>   | 2010 | Nepal      | Asia          | SRR308722  | SRR308722                                     |                   | Hendriksen et al. Mbio 2011               |
| <b>VC-18</b>   | 2010 | Nepal      | Asia          | SRR308721  | SRR308721                                     |                   | Hendriksen et al. Mbio 2011               |
| <b>VC-17</b>   | 2010 | Nepal      | Asia          | SRR308720  | SRR308720                                     |                   | Hendriksen et al. Mbio 2011               |
| <b>VC-16</b>   | 2010 | Nepal      | Asia          | SRR308717  | SRR308717                                     |                   | Hendriksen et al. Mbio 2011               |
| <b>VC-15</b>   | 2010 | Nepal      | Asia          | SRR308716  | SRR308716                                     |                   | Hendriksen et al. Mbio 2011               |
| <b>VC-14</b>   | 2010 | Nepal      | Asia          | SRR308715  | SRR308715                                     |                   | Hendriksen et al. Mbio 2011               |
| <b>VC-13</b>   | 2010 | Nepal      | Asia          | SRR308713  | SRR308713                                     |                   | Hendriksen et al. Mbio 2011               |
| <b>VC-12</b>   | 2010 | Nepal      | Asia          | SRR308709  | SRR308709                                     |                   | Hendriksen et al. Mbio 2011               |
| <b>VC-11</b>   | 2010 | Nepal      | Asia          | SRR308708  | SRR308708                                     |                   | Hendriksen et al. Mbio 2011               |
| <b>VC-10</b>   | 2010 | Nepal      | Asia          | SRR308707  | SRR308707                                     |                   | Hendriksen et al. Mbio 2011               |
| <b>VC-9</b>    | 2010 | Nepal      | Asia          | SRR308706  | SRR308706                                     |                   | Hendriksen et al. Mbio 2011               |
| <b>VC-8</b>    | 2010 | Nepal      | Asia          | SRR308705  | SRR308705                                     |                   | Hendriksen et al. Mbio 2011               |
| <b>VC-7</b>    | 2010 | Nepal      | Asia          | SRR308704  | SRR308704                                     |                   | Hendriksen et al. Mbio 2011               |
| <b>VC-6</b>    | 2010 | Nepal      | Asia          | SRR308703  | SRR308703                                     |                   | Hendriksen et al. Mbio 2011               |
| <b>VC-5</b>    | 2010 | Nepal      | Asia          | SRR308693  | SRR308693                                     |                   | Hendriksen et al. Mbio 2011               |
| <b>VC-4</b>    | 2010 | Nepal      | Asia          | SRR308692  | SRR308692                                     |                   | Hendriksen et al. Mbio 2011               |
| <b>VC-3</b>    | 2010 | Nepal      | Asia          | SRR308691  | SRR308691                                     |                   | Hendriksen et al. Mbio 2011               |

|                    |      |                          |               |            |                       |  |                                      |
|--------------------|------|--------------------------|---------------|------------|-----------------------|--|--------------------------------------|
| <b>VC-2</b>        | 2010 | Nepal                    | Asia          | SRR308690  | SRR308690             |  | Hendriksen et al. Mbio 2011          |
| <b>VC-1</b>        | 2010 | Nepal                    | Asia          | SRR308665  | SRR308665             |  | Hendriksen et al. Mbio 2011          |
| <b>Tanz_100_1</b>  | 2015 | Tanzania                 | Africa        | ERS2318718 | IL100065177_S148_L008 |  | Kachwamba et al. BMC Infect Dis 2017 |
| <b>Tanz_78</b>     | 2015 | Tanzania                 | Africa        | ERS2318712 | IL100065171_S142_L008 |  | Kachwamba et al. BMC Infect Dis 2017 |
| <b>Tanz_65</b>     | 2015 | Tanzania                 | Africa        | ERS2318708 | IL100065167_S138_L008 |  | Kachwamba et al. BMC Infect Dis 2017 |
| <b>Tanz_60</b>     | 2012 | Tanzania                 | Africa        | ERS2318705 | IL100065164_S135_L008 |  | Kachwamba et al. BMC Infect Dis 2017 |
| <b>Tanz_58</b>     | 2011 | Tanzania                 | Africa        | ERS2318704 | IL100065163_S134_L008 |  | Kachwamba et al. BMC Infect Dis 2017 |
| <b>Tanz_56</b>     | 2012 | Tanzania                 | Africa        | ERS2318703 | IL100065162_S133_L008 |  | Kachwamba et al. BMC Infect Dis 2017 |
| <b>Tanz_48</b>     | 2015 | Tanzania                 | Africa        | ERS2318700 | IL100064947_S130_L008 |  | Kachwamba et al. BMC Infect Dis 2017 |
| <b>Tanz_42</b>     | 2015 | Tanzania                 | Africa        | ERS2318697 | IL100064944_S127_L008 |  | Kachwamba et al. BMC Infect Dis 2017 |
| <b>Tanz_33</b>     | 2015 | Tanzania                 | Africa        | ERS2318693 | IL100064940_S123_L008 |  | Kachwamba et al. BMC Infect Dis 2017 |
| <b>Tanz_20</b>     | 2015 | Tanzania                 | Africa        | ERS2318689 | IL100064936_S119_L008 |  | Kachwamba et al. BMC Infect Dis 2017 |
| <b>Tanz_14</b>     | 2015 | Tanzania                 | Africa        | ERS2318685 | IL100064932_S115_L008 |  | Kachwamba et al. BMC Infect Dis 2017 |
| <b>Tanz_9</b>      | 2015 | Tanzania                 | Africa        | ERS2318682 | IL100064929_S45_L002  |  | Kachwamba et al. BMC Infect Dis 2017 |
| <b>Tanz_3</b>      | 2015 | Tanzania                 | Africa        | ERS2318681 | IL100064928_S44_L002  |  | Kachwamba et al. BMC Infect Dis 2017 |
| <b>Tanz_2</b>      | 2015 | Tanzania                 | Africa        | ERS2318680 | IL100064927_S43_L002  |  | Kachwamba et al. BMC Infect Dis 2017 |
| <b>CP1050</b>      | 2010 | Bangladesh               | Asia          | SRR227335  | SRR227335             |  | Katz et al. Mbio 2013                |
| <b>CP1048</b>      | 2010 | Bangladesh               | Asia          | SRR227303  | SRR227303             |  | Katz et al. Mbio 2013                |
| <b>2010EL_1749</b> | 2010 | Cameroon                 | Africa        | SRR773655  | 2010EL_1749           |  | Katz et al. Mbio 2013                |
| <b>HC-22A1</b>     | 2010 | Haiti                    | North America | SRR191381  | SRR191381             |  | Katz et al. Mbio 2013                |
| <b>HC-68A1</b>     | 2010 | Haiti                    | North America | SRR191363  | SRR191363             |  | Katz et al. Mbio 2013                |
| <b>HC-40A1</b>     | 2010 | Haiti                    | North America | SRR135545  | SRR135545             |  | Katz et al. Mbio 2013                |
| <b>HCUF01</b>      | 2010 | Haiti                    | North America | SRR135540  | SRR135540             |  | Katz et al. Mbio 2013                |
| <b>2012EL-1410</b> | 2012 | Haiti                    | North America | SRR773397  | SR773397              |  | Katz et al. Mbio 2013                |
| <b>2011EL_1137</b> | 2009 | Republic of South Africa | Africa        | SRR774784  | 2011EL_1137           |  | Katz et al. Mbio 2013                |

|                |      |          |        |           |           |  |                            |
|----------------|------|----------|--------|-----------|-----------|--|----------------------------|
| <b>CP1042</b>  | 2010 | Thailand | Asia   | SRR227324 | SRR227324 |  | Katz et al. Mbio 2013      |
| <b>CP1041</b>  | 2004 | Zambia   | Africa | SRR227309 | SRR227309 |  | Katz et al. Mbio 2013      |
| <b>CP1038</b>  | 2009 | Zimbabwe | Africa | SRR227311 | SRR227311 |  | Katz et al. Mbio 2013      |
| <b>KNC1709</b> | 2009 | Kenya    | Africa | ERR114418 | 7346_8_53 |  | Kiiru et al. Plos One 2013 |
| <b>KNC8678</b> | 2009 | Kenya    | Africa | ERR114416 | 7346_8_51 |  | Kiiru et al. Plos One 2013 |
| <b>KNC8673</b> | 2009 | Kenya    | Africa | ERR114415 | 7346_8_50 |  | Kiiru et al. Plos One 2013 |
| <b>KNC151</b>  | 2010 | Kenya    | Africa | ERR117573 | 7298_7_7  |  | Kiiru et al. Plos One 2013 |
| <b>KNC135</b>  | 2009 | Kenya    | Africa | ERR117572 | 7298_7_6  |  | Kiiru et al. Plos One 2013 |
| <b>KNC145</b>  | 2010 | Kenya    | Africa | ERR117571 | 7298_7_5  |  | Kiiru et al. Plos One 2013 |
| <b>KNC1509</b> | 2009 | Kenya    | Africa | ERR117613 | 7298_7_47 |  | Kiiru et al. Plos One 2013 |
| <b>KNC8572</b> | 2009 | Kenya    | Africa | ERR117612 | 7298_7_46 |  | Kiiru et al. Plos One 2013 |
| <b>KNC8675</b> | 2009 | Kenya    | Africa | ERR117610 | 7298_7_44 |  | Kiiru et al. Plos One 2013 |
| <b>KNC207</b>  | 2009 | Kenya    | Africa | ERR117609 | 7298_7_43 |  | Kiiru et al. Plos One 2013 |
| <b>KNC1420</b> | 2009 | Kenya    | Africa | ERR117607 | 7298_7_41 |  | Kiiru et al. Plos One 2013 |
| <b>KNC8679</b> | 2008 | Kenya    | Africa | ERR117606 | 7298_7_40 |  | Kiiru et al. Plos One 2013 |
| <b>KNC233</b>  | 2009 | Kenya    | Africa | ERR117605 | 7298_7_39 |  | Kiiru et al. Plos One 2013 |
| <b>KNC206</b>  | 2009 | Kenya    | Africa | ERR117604 | 7298_7_38 |  | Kiiru et al. Plos One 2013 |
| <b>KNC231</b>  | 2009 | Kenya    | Africa | ERR117600 | 7298_7_34 |  | Kiiru et al. Plos One 2013 |
| <b>KNC8669</b> | 2010 | Kenya    | Africa | ERR117599 | 7298_7_33 |  | Kiiru et al. Plos One 2013 |
| <b>KNC155</b>  | 2010 | Kenya    | Africa | ERR117597 | 7298_7_31 |  | Kiiru et al. Plos One 2013 |
| <b>KNE168</b>  | 2010 | Kenya    | Africa | ERR117569 | 7298_7_3  |  | Kiiru et al. Plos One 2013 |
| <b>KNC8885</b> | 2010 | Kenya    | Africa | ERR117595 | 7298_7_29 |  | Kiiru et al. Plos One 2013 |
| <b>KNC156</b>  | 2009 | Kenya    | Africa | ERR117594 | 7298_7_28 |  | Kiiru et al. Plos One 2013 |
| <b>KNC1888</b> | 2007 | Kenya    | Africa | ERR117593 | 7298_7_27 |  | Kiiru et al. Plos One 2013 |
| <b>KNC157</b>  | 2009 | Kenya    | Africa | ERR117592 | 7298_7_26 |  | Kiiru et al. Plos One 2013 |
| <b>KNC161</b>  | 2010 | Kenya    | Africa | ERR117590 | 7298_7_24 |  | Kiiru et al. Plos One 2013 |
| <b>KNC147</b>  | 2010 | Kenya    | Africa | ERR117588 | 7298_7_22 |  | Kiiru et al. Plos One 2013 |
| <b>KNC11</b>   | 2010 | Kenya    | Africa | ERR117586 | 7298_7_20 |  | Kiiru et al. Plos One 2013 |



|                   |      |          |               |            |                         |  |                            |
|-------------------|------|----------|---------------|------------|-------------------------|--|----------------------------|
| <b>KNC158</b>     | 2010 | Kenya    | Africa        | ERR117583  | 7298_7_17               |  | Kiiru et al. Plos One 2013 |
| <b>KNC8889</b>    | 2010 | Kenya    | Africa        | ERR117581  | 7298_7_15               |  | Kiiru et al. Plos One 2013 |
| <b>KNC133</b>     | 2007 | Kenya    | Africa        | ERR117579  | 7298_7_13               |  | Kiiru et al. Plos One 2013 |
| <b>KNC8880</b>    | 2010 | Kenya    | Africa        | ERR117578  | 7298_7_12               |  | Kiiru et al. Plos One 2013 |
| <b>KNC56</b>      | 2010 | Kenya    | Africa        | ERR117577  | 7298_7_11               |  | Kiiru et al. Plos One 2013 |
| <b>KNEXXH</b>     | 2009 | Kenya    | Africa        | ERR117556  | 7298_6_86               |  | Kiiru et al. Plos One 2013 |
| <b>KNEXC</b>      | 2009 | Kenya    | Africa        | ERR117555  | 7298_6_85               |  | Kiiru et al. Plos One 2013 |
| <b>KNE3C</b>      | 2010 | Kenya    | Africa        | ERR117473  | 7298_5_3                |  | Kiiru et al. Plos One 2013 |
| <b>KNE3G</b>      | 2010 | Kenya    | Africa        | ERR117490  | 7298_5_20               |  | Kiiru et al. Plos One 2013 |
| <b>KNE170</b>     | 2010 | Kenya    | Africa        | ERR117485  | 7298_5_15               |  | Kiiru et al. Plos One 2013 |
| <b>KNE11B</b>     | 2010 | Kenya    | Africa        | ERR117484  | 7298_5_14               |  | Kiiru et al. Plos One 2013 |
| <b>KNE134B</b>    | 2009 | Kenya    | Africa        | ERR117482  | 7298_5_12               |  | Kiiru et al. Plos One 2013 |
| <b>KNE134</b>     | 2009 | Kenya    | Africa        | ERR117480  | 7298_5_10               |  | Kiiru et al. Plos One 2013 |
| <b>VE3</b>        | 2010 | Kenya    | Africa        | ERR037741  | 6084_8_20               |  | Kiiru et al. Plos One 2013 |
| <b>VE2</b>        | 2010 | Kenya    | Africa        | ERR037739  | 6084_8_19               |  | Kiiru et al. Plos One 2013 |
| <b>VE1</b>        | 2010 | Kenya    | Africa        | ERR037738  | 6084_8_18               |  | Kiiru et al. Plos One 2013 |
| <b>YA00122542</b> | 2018 | Zimbabwe | Africa        | ERR3342516 | YA00122542-VCH_S14_L001 |  | Mashe et al. NEJM 2020     |
| <b>YA00122540</b> | 2018 | Zimbabwe | Africa        | ERR3342515 | YA00122540-VCH_S12_L001 |  | Mashe et al. NEJM 2020     |
| <b>YA00122539</b> | 2018 | Zimbabwe | Africa        | ERR3342514 | YA00122539-VCH_S11_L001 |  | Mashe et al. NEJM 2020     |
| <b>YA00122538</b> | 2018 | Zimbabwe | Africa        | ERR3342513 | YA00122538-VCH_S23_L001 |  | Mashe et al. NEJM 2020     |
| <b>YA00122536</b> | 2018 | Zimbabwe | Africa        | ERR3342512 | YA00122536-VCH_S22_L001 |  | Mashe et al. NEJM 2020     |
| <b>YA00122534</b> | 2018 | Zimbabwe | Africa        | ERR3342511 | YA00122534-VCH_S20_L001 |  | Mashe et al. NEJM 2020     |
| <b>YA00122533</b> | 2018 | Zimbabwe | Africa        | ERR3342510 | YA00122533-VCH_S19_L001 |  | Mashe et al. NEJM 2020     |
| <b>YA00122532</b> | 2018 | Zimbabwe | Africa        | ERR3342509 | YA00122532-VCH_S18_L001 |  | Mashe et al. NEJM 2020     |
| <b>YA00122531</b> | 2018 | Zimbabwe | Africa        | ERR3342508 | YA00122531-VCH_S17_L001 |  | Mashe et al. NEJM 2020     |
| <b>YA00122530</b> | 2018 | Zimbabwe | Africa        | ERR3342507 | YA00122530-VCH_S16_L001 |  | Mashe et al. NEJM 2020     |
| <b>YA00120881</b> | 2018 | Zimbabwe | Africa        | ERR3342506 | YA00120881-VCH_S10_L001 |  | Mashe et al. NEJM 2020     |
| <b>env894</b>     | 2013 | Haiti    | North America | SRR8364258 | SRR8364258              |  | Mavian et al. PNAS 2020    |

|                |      |       |               |            |            |                         |
|----------------|------|-------|---------------|------------|------------|-------------------------|
| <b>HC330</b>   | 2013 | Haiti | North America | SRR8364340 | SRR8364340 | Mavian et al. PNAS 2020 |
| <b>HC309</b>   | 2013 | Haiti | North America | SRR8364342 | SRR8364342 | Mavian et al. PNAS 2020 |
| <b>HC380</b>   | 2013 | Haiti | North America | SRR8364346 | SRR8364346 | Mavian et al. PNAS 2020 |
| <b>HC391</b>   | 2013 | Haiti | North America | SRR8364345 | SRR8364345 | Mavian et al. PNAS 2020 |
| <b>HC318</b>   | 2013 | Haiti | North America | SRR8364341 | SRR8364341 | Mavian et al. PNAS 2020 |
| <b>HC441</b>   | 2013 | Haiti | North America | SRR8364344 | SRR8364344 | Mavian et al. PNAS 2020 |
| <b>HC560</b>   | 2013 | Haiti | North America | SRR8364269 | SRR8364269 | Mavian et al. PNAS 2020 |
| <b>env1112</b> | 2013 | Haiti | North America | SRR8364288 | SRR8364288 | Mavian et al. PNAS 2020 |
| <b>HC635</b>   | 2013 | Haiti | North America | SRR8364310 | SRR8364310 | Mavian et al. PNAS 2020 |
| <b>env1218</b> | 2013 | Haiti | North America | SRR8364430 | SRR8364430 | Mavian et al. PNAS 2020 |
| <b>HC861</b>   | 2013 | Haiti | North America | SRR8364311 | SRR8364311 | Mavian et al. PNAS 2020 |
| <b>env1320</b> | 2013 | Haiti | North America | SRR8364436 | SRR8364436 | Mavian et al. PNAS 2020 |
| <b>HC992</b>   | 2013 | Haiti | North America | SRR8364358 | SRR8364358 | Mavian et al. PNAS 2020 |
| <b>env1792</b> | 2014 | Haiti | North America | SRR8364256 | SRR8364256 | Mavian et al. PNAS 2020 |
| <b>HC1730</b>  | 2014 | Haiti | North America | SRR8364347 | SRR8364347 | Mavian et al. PNAS 2020 |
| <b>HC1799</b>  | 2015 | Haiti | North America | SRR8364353 | SRR8364353 | Mavian et al. PNAS 2020 |
| <b>HC1892</b>  | 2015 | Haiti | North America | SRR8364413 | SRR8364413 | Mavian et al. PNAS 2020 |
| <b>env4303</b> | 2015 | Haiti | North America | SRR8364261 | SRR8364261 | Mavian et al. PNAS 2020 |
| <b>HC1961</b>  | 2015 | Haiti | North America | SRR8364418 | SRR8364418 | Mavian et al. PNAS 2020 |
| <b>HC1975</b>  | 2015 | Haiti | North America | SRR8364420 | SRR8364420 | Mavian et al. PNAS 2020 |
| <b>HC1996</b>  | 2015 | Haiti | North America | SRR8364396 | SRR8364396 | Mavian et al. PNAS 2020 |
| <b>HC2003</b>  | 2015 | Haiti | North America | SRR8364392 | SRR8364392 | Mavian et al. PNAS 2020 |
| <b>HC2015</b>  | 2015 | Haiti | North America | SRR8364398 | SRR8364398 | Mavian et al. PNAS 2020 |
| <b>HC2036</b>  | 2015 | Haiti | North America | SRR8364443 | SRR8364443 | Mavian et al. PNAS 2020 |

|                 |      |            |               |            |            |                            |
|-----------------|------|------------|---------------|------------|------------|----------------------------|
| <b>env4449</b>  | 2015 | Haiti      | North America | SRR8364260 | SRR8364260 | Mavian et al. PNAS 2020    |
| <b>HC2068</b>   | 2015 | Haiti      | North America | SRR8364427 | SRR8364427 | Mavian et al. PNAS 2020    |
| <b>HC2118</b>   | 2016 | Haiti      | North America | SRR8364324 | SRR8364324 | Mavian et al. PNAS 2020    |
| <b>HC2117</b>   | 2016 | Haiti      | North America | SRR8364323 | SRR8364323 | Mavian et al. PNAS 2020    |
| <b>HC2119</b>   | 2016 | Haiti      | North America | SRR8364327 | SRR8364327 | Mavian et al. PNAS 2020    |
| <b>HC2123</b>   | 2016 | Haiti      | North America | SRR8364319 | SRR8364319 | Mavian et al. PNAS 2020    |
| <b>HC2151</b>   | 2016 | Haiti      | North America | SRR8364336 | SRR8364336 | Mavian et al. PNAS 2020    |
| <b>HC2165</b>   | 2016 | Haiti      | North America | SRR8364273 | SRR8364273 | Mavian et al. PNAS 2020    |
| <b>HC2220</b>   | 2016 | Haiti      | North America | SRR8364423 | SRR8364423 | Mavian et al. PNAS 2020    |
| <b>HC2335</b>   | 2016 | Haiti      | North America | SRR8364329 | SRR8364329 | Mavian et al. PNAS 2020    |
| <b>HC2397</b>   | 2017 | Haiti      | North America | SRR8364334 | SRR8364334 | Mavian et al. PNAS 2020    |
| <b>HC2417</b>   | 2017 | Haiti      | North America | SRR8364406 | SRR8364406 | Mavian et al. PNAS 2020    |
| <b>HC2439</b>   | 2017 | Haiti      | North America | SRR8364453 | SRR8364453 | Mavian et al. PNAS 2020    |
| <b>HC2459</b>   | 2017 | Haiti      | North America | SRR8364449 | SRR8364449 | Mavian et al. PNAS 2020    |
| <b>HC2508</b>   | 2017 | Haiti      | North America | SRR8364384 | SRR8364384 | Mavian et al. PNAS 2020    |
| <b>HC2554</b>   | 2017 | Haiti      | North America | SRR8364300 | SRR8364300 | Mavian et al. PNAS 2020    |
| <b>HC2541</b>   | 2017 | Haiti      | North America | SRR8364388 | SRR8364388 | Mavian et al. PNAS 2020    |
| <b>A5</b>       | 1989 | Angola     | Africa        | ERR025381  | 5174_7_4   | Mutreja et al. Nature 2011 |
| <b>A316</b>     | 1993 | Argentina  | South America | ERR018181  | 4056_8_8   | Mutreja et al. Nature 2011 |
| <b>A200</b>     | 1992 | Argentina  | South America | ERR018168  | 4056_7_8   | Mutreja et al. Nature 2011 |
| <b>A201</b>     | 1992 | Argentina  | South America | ERR018167  | 4056_7_7   | Mutreja et al. Nature 2011 |
| <b>A186</b>     | 1992 | Argentina  | South America | ERR018158  | 4056_7_1   | Mutreja et al. Nature 2011 |
| <b>GP143</b>    | 1978 | Bahrein    | Asia          | ERR018192  | 4075_3_6   | Mutreja et al. Nature 2011 |
| <b>MG116226</b> | 1991 | Bangladesh | Asia          | ERR025396  | 5174_8_9   | Mutreja et al. Nature 2011 |
| <b>A22</b>      | 1979 | Bangladesh | Asia          | ERR025386  | 5174_7_9   | Mutreja et al. Nature 2011 |

|                 |      |            |               |           |           |                            |
|-----------------|------|------------|---------------|-----------|-----------|----------------------------|
| <b>A19</b>      | 1971 | Bangladesh | Asia          | ERR025385 | 5174_7_8  | Mutreja et al. Nature 2011 |
| <b>A10</b>      | 1979 | Bangladesh | Asia          | ERR025383 | 5174_7_6  | Mutreja et al. Nature 2011 |
| <b>4662</b>     | 2001 | Bangladesh | Asia          | ERR025373 | 5174_6_7  | Mutreja et al. Nature 2011 |
| <b>A487(2)</b>  | 2007 | Bangladesh | Asia          | ERR018182 | 4056_8_9  | Mutreja et al. Nature 2011 |
| <b>A346(2)</b>  | 1994 | Bangladesh | Asia          | ERR018179 | 4056_8_6  | Mutreja et al. Nature 2011 |
| <b>A390</b>     | 1987 | Bangladesh | Asia          | ERR018177 | 4056_8_4  | Mutreja et al. Nature 2011 |
| <b>A397</b>     | 1987 | Bangladesh | Asia          | ERR018176 | 4056_8_3  | Mutreja et al. Nature 2011 |
| <b>A488(2)</b>  | 2006 | Bangladesh | Asia          | ERR018128 | 4056_2_7  | Mutreja et al. Nature 2011 |
| <b>MG116025</b> | 1991 | Bangladesh | Asia          | ERR018122 | 4056_2_12 | Mutreja et al. Nature 2011 |
| <b>A383</b>     | 2002 | Bangladesh | Asia          | ERR018121 | 4056_2_11 | Mutreja et al. Nature 2011 |
| <b>MJ1485</b>   | 1994 | Bangladesh | Asia          | ERR018120 | 4056_2_10 | Mutreja et al. Nature 2011 |
| <b>4672</b>     | 2000 | Bangladesh | Asia          | ERR019884 | 3002_8_6  | Mutreja et al. Nature 2011 |
| <b>4670</b>     | 1991 | Bangladesh | Asia          | ERR019883 | 3002_8_5  | Mutreja et al. Nature 2011 |
| <b>4661</b>     | 2001 | Bangladesh | Asia          | ERR018116 | 2956_6_6  | Mutreja et al. Nature 2011 |
| <b>4663</b>     | 2001 | Bangladesh | Asia          | ERR018115 | 2956_6_5  | Mutreja et al. Nature 2011 |
| <b>4679</b>     | 1999 | Bangladesh | Asia          | ERR018114 | 2956_6_4  | Mutreja et al. Nature 2011 |
| <b>4675</b>     | 2001 | Bangladesh | Asia          | ERR018113 | 2956_6_3  | Mutreja et al. Nature 2011 |
| <b>A193</b>     | 1992 | Bolivia    | South America | ERR018160 | 4056_7_11 | Mutreja et al. Nature 2011 |
| <b>A185</b>     | 1992 | Colombia   | South America | ERR018156 | 4056_6_9  | Mutreja et al. Nature 2011 |
| <b>A177</b>     | 1992 | Colombia   | South America | ERR018149 | 4056_6_2  | Mutreja et al. Nature 2011 |
| <b>A180</b>     | 1992 | Colombia   | South America | ERR018148 | 4056_6_12 | Mutreja et al. Nature 2011 |
| <b>A184</b>     | 1992 | Colombia   | South America | ERR018146 | 4056_6_10 | Mutreja et al. Nature 2011 |
| <b>A481</b>     | 2007 | Djibouti   | Africa        | ERR018175 | 4056_8_2  | Mutreja et al. Nature 2011 |
| <b>A482</b>     | 2007 | Djibouti   | Africa        | ERR018174 | 4056_8_12 | Mutreja et al. Nature 2011 |
| <b>A483</b>     | 2007 | Djibouti   | Africa        | ERR018172 | 4056_8_10 | Mutreja et al. Nature 2011 |
| <b>A18</b>      | 1977 | India      | Asia          | ERR025384 | 5174_7_7  | Mutreja et al. Nature 2011 |
| <b>4536</b>     | 2007 | India      | Asia          | ERR025375 | 5174_6_9  | Mutreja et al. Nature 2011 |

|                  |      |       |      |           |           |  |                            |
|------------------|------|-------|------|-----------|-----------|--|----------------------------|
| <b>4519</b>      | 2005 | India | Asia | ERR025374 | 5174_6_8  |  | Mutreja et al. Nature 2011 |
| <b>4646</b>      | 2007 | India | Asia | ERR025372 | 5174_6_6  |  | Mutreja et al. Nature 2011 |
| <b>4600</b>      | 2007 | India | Asia | ERR025371 | 5174_6_5  |  | Mutreja et al. Nature 2011 |
| <b>4488</b>      | 2006 | India | Asia | ERR025369 | 5174_6_3  |  | Mutreja et al. Nature 2011 |
| <b>4552</b>      | 2007 | India | Asia | ERR025368 | 5174_6_2  |  | Mutreja et al. Nature 2011 |
| <b>4585</b>      | 2007 | India | Asia | ERR025366 | 5174_6_1  |  | Mutreja et al. Nature 2011 |
| <b>4339</b>      | 2004 | India | Asia | ERR025361 | 5174_5_6  |  | Mutreja et al. Nature 2011 |
| <b>4538</b>      | 2007 | India | Asia | ERR025360 | 5174_5_5  |  | Mutreja et al. Nature 2011 |
| <b>4593</b>      | 2007 | India | Asia | ERR025359 | 5174_5_4  |  | Mutreja et al. Nature 2011 |
| <b>4623</b>      | 2007 | India | Asia | ERR025358 | 5174_5_3  |  | Mutreja et al. Nature 2011 |
| <b>4551</b>      | 2007 | India | Asia | ERR025357 | 5174_5_2  |  | Mutreja et al. Nature 2011 |
| <b>PRL64</b>     | 1992 | India | Asia | ERR018195 | 4075_3_9  |  | Mutreja et al. Nature 2011 |
| <b>PRL5</b>      | 1980 | India | Asia | ERR018189 | 4075_3_3  |  | Mutreja et al. Nature 2011 |
| <b>GP152</b>     | 1979 | India | Asia | ERR018188 | 4075_3_2  |  | Mutreja et al. Nature 2011 |
| <b>IDHO1'726</b> | 2009 | India | Asia | ERR018187 | 4075_3_12 |  | Mutreja et al. Nature 2011 |
| <b>GP60</b>      | 1973 | India | Asia | ERR018186 | 4075_3_11 |  | Mutreja et al. Nature 2011 |
| <b>A130</b>      | 1989 | India | Asia | ERR018154 | 4056_6_7  |  | Mutreja et al. Nature 2011 |
| <b>A131</b>      | 1989 | India | Asia | ERR018153 | 4056_6_6  |  | Mutreja et al. Nature 2011 |
| <b>MBRN14</b>    | 2004 | India | Asia | ERR018130 | 4056_2_9  |  | Mutreja et al. Nature 2011 |
| <b>V5</b>        | 1989 | India | Asia | ERR018127 | 4056_2_6  |  | Mutreja et al. Nature 2011 |
| <b>V109</b>      | 1990 | India | Asia | ERR018126 | 4056_2_5  |  | Mutreja et al. Nature 2011 |
| <b>V212-1</b>    | 1991 | India | Asia | ERR018125 | 4056_2_4  |  | Mutreja et al. Nature 2011 |
| <b>VC51</b>      | 1992 | India | Asia | ERR018124 | 4056_2_3  |  | Mutreja et al. Nature 2011 |
| <b>MBN17</b>     | 2004 | India | Asia | ERR018123 | 4056_2_2  |  | Mutreja et al. Nature 2011 |
| <b>A330</b>      | 1993 | India | Asia | ERR018119 | 4056_2_1  |  | Mutreja et al. Nature 2011 |
| <b>4322</b>      | 2004 | India | Asia | ERR019881 | 3002_8_3  |  | Mutreja et al. Nature 2011 |
| <b>4656</b>      | 2006 | India | Asia | ERR018112 | 2956_6_2  |  | Mutreja et al. Nature 2011 |
| <b>4605</b>      | 2007 | India | Asia | ERR018111 | 2956_6_1  |  | Mutreja et al. Nature 2011 |

|              |      |            |               |           |           |                            |
|--------------|------|------------|---------------|-----------|-----------|----------------------------|
| <b>A6</b>    | 1957 | Indonesia  | Asia          | ERR025382 | 5174_7_5  | Mutreja et al. Nature 2011 |
| <b>7685</b>  | 2009 | Kenya      | Africa        | ERR028076 | 4370_3_8  | Mutreja et al. Nature 2011 |
| <b>7686</b>  | 2009 | Kenya      | Africa        | ERR028075 | 4370_3_7  | Mutreja et al. Nature 2011 |
| <b>7687</b>  | 2009 | Kenya      | Africa        | ERR028074 | 4370_3_6  | Mutreja et al. Nature 2011 |
| <b>7684</b>  | 2009 | Kenya      | Africa        | ERR028068 | 4370_3_11 | Mutreja et al. Nature 2011 |
| <b>7682</b>  | 2009 | Kenya      | Africa        | ERR028066 | 4370_3_1  | Mutreja et al. Nature 2011 |
| <b>6215</b>  | 2005 | Kenya      | Africa        | ERR019297 | 4370_2_9  | Mutreja et al. Nature 2011 |
| <b>6193</b>  | 2005 | Kenya      | Africa        | ERR019296 | 4370_2_8  | Mutreja et al. Nature 2011 |
| <b>6194</b>  | 2007 | Kenya      | Africa        | ERR019295 | 4370_2_7  | Mutreja et al. Nature 2011 |
| <b>6197</b>  | 2007 | Kenya      | Africa        | ERR019292 | 4370_2_4  | Mutreja et al. Nature 2011 |
| <b>6201</b>  | 2007 | Kenya      | Africa        | ERR019291 | 4370_2_3  | Mutreja et al. Nature 2011 |
| <b>6210</b>  | 2007 | Kenya      | Africa        | ERR019290 | 4370_2_2  | Mutreja et al. Nature 2011 |
| <b>6212</b>  | 2007 | Kenya      | Africa        | ERR019289 | 4370_2_12 | Mutreja et al. Nature 2011 |
| <b>6191</b>  | 2005 | Kenya      | Africa        | ERR019288 | 4370_2_11 | Mutreja et al. Nature 2011 |
| <b>6214</b>  | 2007 | Kenya      | Africa        | ERR019287 | 4370_2_10 | Mutreja et al. Nature 2011 |
| <b>GP140</b> | 1978 | Malaysia   | Asia          | ERR018193 | 4075_3_7  | Mutreja et al. Nature 2011 |
| <b>A231</b>  | 1991 | Mexico     | North America | ERR018161 | 4056_7_12 | Mutreja et al. Nature 2011 |
| <b>A232</b>  | 1991 | Mexico     | North America | ERR018159 | 4056_7_10 | Mutreja et al. Nature 2011 |
| <b>1627</b>  | 2005 | Mozambique | Africa        | ERR025377 | 5174_7_1  | Mutreja et al. Nature 2011 |
| <b>1362</b>  | 2005 | Mozambique | Africa        | ERR025367 | 5174_6_10 | Mutreja et al. Nature 2011 |
| <b>1346</b>  | 2005 | Mozambique | Africa        | ERR025356 | 5174_5_1  | Mutreja et al. Nature 2011 |
| <b>A152</b>  | 1991 | Mozambique | Africa        | ERR018152 | 4056_6_5  | Mutreja et al. Nature 2011 |
| <b>A154</b>  | 1991 | Mozambique | Africa        | ERR018151 | 4056_6_4  | Mutreja et al. Nature 2011 |
| <b>A155</b>  | 1991 | Mozambique | Africa        | ERR018150 | 4056_6_3  | Mutreja et al. Nature 2011 |
| <b>A32</b>   | 1991 | Peru       | South America | ERR025390 | 5174_8_3  | Mutreja et al. Nature 2011 |
| <b>A31</b>   | 1991 | Peru       | South America | ERR025389 | 5174_8_2  | Mutreja et al. Nature 2011 |
| <b>A29</b>   | 1991 | Peru       | South America | ERR025388 | 5174_8_1  | Mutreja et al. Nature 2011 |

|                    |      |          |               |           |             |                       |                            |
|--------------------|------|----------|---------------|-----------|-------------|-----------------------|----------------------------|
| <b>A27</b>         | 1991 | Peru     | South America | ERR025378 | 5174_7_10   |                       | Mutreja et al. Nature 2011 |
| <b>4784</b>        | 2009 | Tanzania | Africa        | ERR025370 | 5174_6_4    |                       | Mutreja et al. Nature 2011 |
| <b>A4</b>          | 1973 | Unknown  |               | ERR025380 | 5174_7_3    |                       | Mutreja et al. Nature 2011 |
| <b>A109</b>        | 1990 | Unknown  |               | ERR018147 | 4056_6_11   |                       | Mutreja et al. Nature 2011 |
| <b>4113</b>        | 2003 | Vietnam  | Asia          | ERR025364 | 5174_5_9    |                       | Mutreja et al. Nature 2011 |
| <b>4121</b>        | 2004 | Vietnam  | Asia          | ERR025362 | 5174_5_7    |                       | Mutreja et al. Nature 2011 |
| <b>A245</b>        | 1989 | Vietnam  | Asia          | ERR018171 | 4056_8_1    |                       | Mutreja et al. Nature 2011 |
| <b>A241</b>        | 1989 | Vietnam  | Asia          | ERR018169 | 4056_7_9    |                       | Mutreja et al. Nature 2011 |
| <b>4122</b>        | 2007 | Vietnam  | Asia          | ERR019885 | 3002_8_7    |                       | Mutreja et al. Nature 2011 |
| <b>4111</b>        | 2002 | Vietnam  | Asia          | ERR019880 | 3002_8_2    |                       | Mutreja et al. Nature 2011 |
| <b>4110</b>        | 1995 | Vietnam  | Asia          | ERR019879 | 3002_8_1    |                       | Mutreja et al. Nature 2011 |
| <b>2010EL_1798</b> | 2010 | Haiti    | North America |           | 2010EL_1798 | AELI00000000.1        | Reimer et al. EID 2011     |
| <b>2010EL_1792</b> | 2010 | Haiti    | North America |           | 2010EL_1792 | AELJ00000000.1        | Reimer et al. EID 2011     |
| <b>2010EL_1786</b> | 2010 | Haiti    | North America |           | 2010EL_1786 | CP003069.1/CP003070.1 | Reimer et al. EID 2011     |
| <b>2011EL_1089</b> | 2010 | Haiti    | North America | SRR773660 | 2011EL_1089 |                       | Reimer et al. EID 2011     |
| <b>S9KCH9</b>      | 2010 | Pakistan | Asia          | ERR051772 | 6714_6_5    |                       | Shah et al. EID 2014       |
| <b>S7KCH20</b>     | 2010 | Pakistan | Asia          | ERR051770 | 6714_6_3    |                       | Shah et al. EID 2014       |
| <b>S4KCH16</b>     | 2010 | Pakistan | Asia          | ERR051767 | 6714_5_23   |                       | Shah et al. EID 2014       |
| <b>S2KCH17</b>     | 2010 | Pakistan | Asia          | ERR051765 | 6714_5_21   |                       | Shah et al. EID 2014       |
| <b>S23HH18</b>     | 2010 | Pakistan | Asia          | ERR051786 | 6714_6_19   |                       | Shah et al. EID 2014       |
| <b>S6KCH7</b>      | 2010 | Pakistan | Asia          | ERR051769 | 6714_6_2    |                       | Shah et al. EID 2014       |
| <b>S5KCH10</b>     | 2010 | Pakistan | Asia          | ERR051768 | 6714_6_1    |                       | Shah et al. EID 2014       |
| <b>F8D25</b>       | 2010 | Pakistan | Asia          | ERR051752 | 6714_5_8    |                       | Shah et al. EID 2014       |
| <b>S14P9</b>       | 2010 | Pakistan | Asia          | ERR051777 | 6714_6_10   |                       | Shah et al. EID 2014       |
| <b>F4D48</b>       | 2010 | Pakistan | Asia          | ERR051748 | 6714_5_4    |                       | Shah et al. EID 2014       |
| <b>S26R24</b>      | 2010 | Pakistan | Asia          | ERR051789 | 6714_6_22   |                       | Shah et al. EID 2014       |
| <b>F1DN4</b>       | 2010 | Pakistan | Asia          | ERR051745 | 6714_5_1    |                       | Shah et al. EID 2014       |

|                |      |            |               |             |           |  |                      |
|----------------|------|------------|---------------|-------------|-----------|--|----------------------|
| <b>S27RG11</b> | 2010 | Pakistan   | Asia          | ERR051790   | 6714_6_23 |  | Shah et al. EID 2014 |
| <b>S24RG6</b>  | 2010 | Pakistan   | Asia          | ERR051787   | 6714_6_20 |  | Shah et al. EID 2014 |
| <b>F14KPD3</b> | 2010 | Pakistan   | Asia          | ERR051758   | 6714_5_14 |  | Shah et al. EID 2014 |
| <b>F2D59</b>   | 2010 | Pakistan   | Asia          | ERR051746   | 6714_5_2  |  | Shah et al. EID 2014 |
| <b>F11D4</b>   | 2010 | Pakistan   | Asia          | ERR051755   | 6714_5_11 |  | Shah et al. EID 2014 |
| <b>F7D30</b>   | 2010 | Pakistan   | Asia          | ERR051751   | 6714_5_7  |  | Shah et al. EID 2014 |
| <b>S22HH17</b> | 2010 | Pakistan   | Asia          | ERR051785   | 6714_6_18 |  | Shah et al. EID 2014 |
| <b>S20HH14</b> | 2010 | Pakistan   | Asia          | ERR051783   | 6714_6_16 |  | Shah et al. EID 2014 |
| <b>S16HH1</b>  | 2010 | Pakistan   | Asia          | ERR051779   | 6714_6_12 |  | Shah et al. EID 2014 |
| <b>S8KCH18</b> | 2010 | Pakistan   | Asia          | ERR051771   | 6714_6_4  |  | Shah et al. EID 2014 |
| <b>F17KTH4</b> | 2010 | Pakistan   | Asia          | ERR051761   | 6714_5_17 |  | Shah et al. EID 2014 |
| <b>F18KTH3</b> | 2010 | Pakistan   | Asia          | ERR051762   | 6714_5_18 |  | Shah et al. EID 2014 |
| <b>S17HH3</b>  | 2010 | Pakistan   | Asia          | ERR051780   | 6714_6_13 |  | Shah et al. EID 2014 |
| <b>F12D1</b>   | 2010 | Pakistan   | Asia          | ERR051756   | 6714_5_12 |  | Shah et al. EID 2014 |
| <b>F5D38</b>   | 2010 | Pakistan   | Asia          | ERR051749   | 6714_5_5  |  | Shah et al. EID 2014 |
| <b>S1KCH15</b> | 2010 | Pakistan   | Asia          | ERR051764   | 6714_5_20 |  | Shah et al. EID 2014 |
| <b>S21HH15</b> | 2010 | Pakistan   | Asia          | ERR051784   | 6714_6_17 |  | Shah et al. EID 2014 |
| <b>S25R22</b>  | 2010 | Pakistan   | Asia          | ERR051788   | 6714_6_21 |  | Shah et al. EID 2014 |
| <b>S10P57</b>  | 2010 | Pakistan   | Asia          | ERR051773   | 6714_6_6  |  | Shah et al. EID 2014 |
| <b>F19KTH2</b> | 2010 | Pakistan   | Asia          | ERR051763   | 6714_5_19 |  | Shah et al. EID 2014 |
| <b>S12P76</b>  | 2010 | Pakistan   | Asia          | ERR051775   | 6714_6_8  |  | Shah et al. EID 2014 |
| <b>S13P83</b>  | 2010 | Pakistan   | Asia          | ERR051776   | 6714_6_9  |  | Shah et al. EID 2014 |
| <b>S18HH4</b>  | 2010 | Pakistan   | Asia          | ERR051781   | 6714_6_14 |  | Shah et al. EID 2014 |
| <b>S19HH5</b>  | 2010 | Pakistan   | Asia          | ERR051782   | 6714_6_15 |  | Shah et al. EID 2014 |
| <b>F15KTH7</b> | 2010 | Pakistan   | Asia          | ERR051759   | 6714_5_15 |  | Shah et al. EID 2014 |
| <b>F16KTH6</b> | 2010 | Pakistan   | Asia          | ERR051760   | 6714_5_16 |  | Shah et al. EID 2014 |
| <b>H22</b>     | 2022 | Haiti      | North America | SRR22351617 | H22       |  | This Study           |
| <b>D1</b>      | 2021 | Bangladesh | Asia          | SRR22351616 | D1        |  | This Study           |



|                    |      |                                  |        |             |             |  |                          |
|--------------------|------|----------------------------------|--------|-------------|-------------|--|--------------------------|
| <b>D2</b>          | 2022 | Bangladesh                       | Asia   | SRR22351615 | D2          |  | This Study               |
| <b>D3</b>          | 2022 | Bangladesh                       | Asia   | SRR22351614 | D3          |  | This Study               |
| <b>D4</b>          | 2022 | Bangladesh                       | Asia   | SRR22351613 | D4          |  | This Study               |
| <b>EM1626</b>      | 2011 | Bangladesh                       | Asia   | SRR491153   | SRR491153   |  | Unpublished EBI-ENA      |
| <b>CP1040</b>      | 2004 | Zambia                           | Africa | SRR227307   | SRR227307   |  | Unpublished EBI-ENA      |
| <b>CNRVC110078</b> | 2011 | Bangladesh                       | Asia   | ERR2265590  | CNRVC110078 |  | Weill et al. Nature 2019 |
| <b>CNRVC150256</b> | 2015 | Democratic Republic of the Congo | Africa | ERR2265661  | CNRVC150256 |  | Weill et al. Nature 2019 |
| <b>CNRVC150071</b> | 2015 | Democratic Republic of the Congo | Africa | ERR2265651  | CNRVC150071 |  | Weill et al. Nature 2019 |
| <b>CNRVC150056</b> | 2015 | Democratic Republic of the Congo | Africa | ERR2265650  | CNRVC150056 |  | Weill et al. Nature 2019 |
| <b>THSTI_56712</b> | 2017 | India                            | Asia   | ERR2270662  | THSTI_56712 |  | Weill et al. Nature 2019 |
| <b>THSTI_56695</b> | 2017 | India                            | Asia   | ERR2270661  | THSTI_56695 |  | Weill et al. Nature 2019 |
| <b>THSTI_56650</b> | 2017 | India                            | Asia   | ERR2270660  | THSTI_56650 |  | Weill et al. Nature 2019 |
| <b>THSTI_55199</b> | 2017 | India                            | Asia   | ERR2270659  | THSTI_55199 |  | Weill et al. Nature 2019 |
| <b>THSTI_52665</b> | 2016 | India                            | Asia   | ERR2270658  | THSTI_52665 |  | Weill et al. Nature 2019 |
| <b>THSTI_52629</b> | 2016 | India                            | Asia   | ERR2270657  | THSTI_52629 |  | Weill et al. Nature 2019 |
| <b>THSTI_52588</b> | 2016 | India                            | Asia   | ERR2270656  | THSTI_52588 |  | Weill et al. Nature 2019 |
| <b>THSTI_52586</b> | 2016 | India                            | Asia   | ERR2270655  | THSTI_52586 |  | Weill et al. Nature 2019 |
| <b>THSTI_46073</b> | 2015 | India                            | Asia   | ERR2269953  | THSTI_46073 |  | Weill et al. Nature 2019 |
| <b>THSTI_45983</b> | 2015 | India                            | Asia   | ERR2269952  | THSTI_45983 |  | Weill et al. Nature 2019 |
| <b>THSTI_45869</b> | 2015 | India                            | Asia   | ERR2269951  | THSTI_45869 |  | Weill et al. Nature 2019 |
| <b>THSTI_45544</b> | 2015 | India                            | Asia   | ERR2269950  | THSTI_45544 |  | Weill et al. Nature 2019 |
| <b>THSTI_41081</b> | 2014 | India                            | Asia   | ERR2269949  | THSTI_41081 |  | Weill et al. Nature 2019 |
| <b>THSTI_41055</b> | 2014 | India                            | Asia   | ERR2269948  | THSTI_41055 |  | Weill et al. Nature 2019 |
| <b>THSTI_41049</b> | 2014 | India                            | Asia   | ERR2269947  | THSTI_41049 |  | Weill et al. Nature 2019 |
| <b>THSTI_36268</b> | 2013 | India                            | Asia   | ERR2269946  | THSTI_36268 |  | Weill et al. Nature 2019 |
| <b>THSTI_36136</b> | 2013 | India                            | Asia   | ERR2269945  | THSTI_36136 |  | Weill et al. Nature 2019 |
| <b>THSTI_36133</b> | 2013 | India                            | Asia   | ERR2269944  | THSTI_36133 |  | Weill et al. Nature 2019 |

|                    |      |       |      |            |                         |                          |
|--------------------|------|-------|------|------------|-------------------------|--------------------------|
| <b>THSTI_36124</b> | 2013 | India | Asia | ERR2269930 | THSTI_36124             | Weill et al. Nature 2019 |
| <b>THSTI_33102</b> | 2012 | India | Asia | ERR2269929 | THSTI_33102             | Weill et al. Nature 2019 |
| <b>THSTI_32676</b> | 2012 | India | Asia | ERR2269928 | THSTI_32676             | Weill et al. Nature 2019 |
| <b>THSTI_31698</b> | 2012 | India | Asia | ERR2269927 | THSTI_31698             | Weill et al. Nature 2019 |
| <b>THSTI_27071</b> | 2011 | India | Asia | ERR2269926 | THSTI_27071             | Weill et al. Nature 2019 |
| <b>THSTI_26907</b> | 2011 | India | Asia | ERR2269925 | THSTI_26907             | Weill et al. Nature 2019 |
| <b>THSTI_26871</b> | 2011 | India | Asia | ERR2269924 | THSTI_26871             | Weill et al. Nature 2019 |
| <b>THSTI_26866</b> | 2011 | India | Asia | ERR2269923 | THSTI_26866             | Weill et al. Nature 2019 |
| <b>THSTI_23835</b> | 2010 | India | Asia | ERR2269922 | THSTI_23835             | Weill et al. Nature 2019 |
| <b>THSTI_23485</b> | 2010 | India | Asia | ERR2269921 | THSTI_23485             | Weill et al. Nature 2019 |
| <b>THSTI_20370</b> | 2010 | India | Asia | ERR2269808 | THSTI_20370             | Weill et al. Nature 2019 |
| <b>CNRVC150140</b> | 2015 | India | Asia | ERR2265652 | CNRVC150140             | Weill et al. Nature 2019 |
| <b>CNRVC140176</b> | 2014 | India | Asia | ERR2265649 | CNRVC140176             | Weill et al. Nature 2019 |
| <b>CNRVC170252</b> | 2015 | Iran  | Asia | ERR2269838 | CNRVC170252             | Weill et al. Nature 2019 |
| <b>CNRVC170250</b> | 2013 | Iran  | Asia | ERR2269837 | CNRVC170250             | Weill et al. Nature 2019 |
| <b>CNRVC170249</b> | 2013 | Iran  | Asia | ERR2269836 | CNRVC170249             | Weill et al. Nature 2019 |
| <b>CNRVC170248</b> | 2012 | Iran  | Asia | ERR2269835 | CNRVC170248             | Weill et al. Nature 2019 |
| <b>CNRVC160018</b> | 2007 | Iraq  | Asia | ERR2265666 | CNRVC160018_TCATTC_L001 | Weill et al. Nature 2019 |
| <b>CNRVC160017</b> | 2007 | Iraq  | Asia | ERR2265665 | CNRVC160017_TATAAT_L001 | Weill et al. Nature 2019 |
| <b>CNRVC160016</b> | 2007 | Iraq  | Asia | ERR2265664 | CNRVC160016_TACAGC_L001 | Weill et al. Nature 2019 |
| <b>CNRVC160014</b> | 2007 | Iraq  | Asia | ERR2265663 | CNRVC160014_GCGCTA_L001 | Weill et al. Nature 2019 |
| <b>CNRVC160013</b> | 2007 | Iraq  | Asia | ERR2265662 | CNRVC160013_CTCAGA_L001 | Weill et al. Nature 2019 |
| <b>CNRVC150181</b> | 2015 | Iraq  | Asia | ERR2265660 | CNRVC150181_CCAACA_L001 | Weill et al. Nature 2019 |
| <b>CNRVC150177</b> | 2015 | Iraq  | Asia | ERR2265659 | CNRVC150177_CACTCA_L001 | Weill et al. Nature 2019 |
| <b>CNRVC150171</b> | 2015 | Iraq  | Asia | ERR2265658 | CNRVC150171_ATGAGC_L001 | Weill et al. Nature 2019 |
| <b>CNRVC150170</b> | 2015 | Iraq  | Asia | ERR2265657 | CNRVC150170_ACTGAT_L001 | Weill et al. Nature 2019 |
| <b>CNRVC150169</b> | 2015 | Iraq  | Asia | ERR2265656 | CNRVC150169_GGTAGC_L001 | Weill et al. Nature 2019 |
| <b>CNRVC150168</b> | 2015 | Iraq  | Asia | ERR2265655 | CNRVC150168_GAGTGG_L001 | Weill et al. Nature 2019 |

|                        |      |             |        |            |             |                          |
|------------------------|------|-------------|--------|------------|-------------|--------------------------|
| <b>31_1</b>            | 2015 | Kenya       | Africa | ERR2265589 | VC_31_1     | Weill et al. Nature 2019 |
| <b>4621STDY6714780</b> | 2016 | Kenya       | Africa | ERS1572815 | 22204_7_320 | Weill et al. Nature 2019 |
| <b>4621STDY6714778</b> | 2010 | Kenya       | Africa | ERS1572813 | 22204_7_318 | Weill et al. Nature 2019 |
| <b>4621STDY6714774</b> | 2012 | Kenya       | Africa | ERS1572809 | 22204_7_314 | Weill et al. Nature 2019 |
| <b>4621STDY6714768</b> | 2012 | Kenya       | Africa | ERS1572803 | 22204_7_308 | Weill et al. Nature 2019 |
| <b>4621STDY6714763</b> | 2012 | Kenya       | Africa | ERS1572798 | 22204_7_303 | Weill et al. Nature 2019 |
| <b>4621STDY6714758</b> | 2015 | Kenya       | Africa | ERS1572793 | 22204_7_298 | Weill et al. Nature 2019 |
| <b>4621STDY6714750</b> | 2015 | Kenya       | Africa | ERS1572785 | 22204_7_290 | Weill et al. Nature 2019 |
| <b>4621STDY6714749</b> | 2015 | Kenya       | Africa | ERS1572784 | 22204_7_289 | Weill et al. Nature 2019 |
| <b>4621STDY6714748</b> | 2015 | Kenya       | Africa | ERS1572783 | 22204_7_288 | Weill et al. Nature 2019 |
| <b>CNRVC170165</b>     | 2017 | South Sudan | Africa | ERR2265673 | CNRVC170165 | Weill et al. Nature 2019 |
| <b>CNRVC170164</b>     | 2017 | South Sudan | Africa | ERR2265672 | CNRVC170164 | Weill et al. Nature 2019 |
| <b>CNRVC170161</b>     | 2017 | South Sudan | Africa | ERR2265671 | CNRVC170161 | Weill et al. Nature 2019 |
| <b>CNRVC170160</b>     | 2017 | South Sudan | Africa | ERR2265670 | CNRVC170160 | Weill et al. Nature 2019 |
| <b>CNRVC170159</b>     | 2017 | South Sudan | Africa | ERR2265669 | CNRVC170159 | Weill et al. Nature 2019 |
| <b>CNRVC160462</b>     | 2016 | South Sudan | Africa | ERR2265668 | CNRVC160462 | Weill et al. Nature 2019 |
| <b>CNRVC160461</b>     | 2016 | South Sudan | Africa | ERR2265667 | CNRVC160461 | Weill et al. Nature 2019 |
| <b>CNRVC150165</b>     | 2015 | South Sudan | Africa | ERR2265654 | CNRVC150165 | Weill et al. Nature 2019 |
| <b>CNRVC150141</b>     | 2015 | South Sudan | Africa | ERR2265653 | CNRVC150141 | Weill et al. Nature 2019 |
| <b>CNRVC140079</b>     | 2014 | South Sudan | Africa | ERR2265648 | CNRVC140079 | Weill et al. Nature 2019 |
| <b>CNRVC140077</b>     | 2014 | South Sudan | Africa | ERR2265647 | CNRVC140077 | Weill et al. Nature 2019 |
| <b>CNRVC140072</b>     | 2014 | South Sudan | Africa | ERR2265646 | CNRVC140072 | Weill et al. Nature 2019 |
| <b>CNRVC140069</b>     | 2014 | South Sudan | Africa | ERR2265645 | CNRVC140069 | Weill et al. Nature 2019 |
| <b>CNRVC140054</b>     | 2014 | South Sudan | Africa | ERR2265591 | CNRVC140054 | Weill et al. Nature 2019 |
| <b>CNRVC170242</b>     | 2017 | Yemen       | Asia   | ERR2269834 | CNRVC170242 | Weill et al. Nature 2019 |

|                    |      |       |      |            |             |  |                          |
|--------------------|------|-------|------|------------|-------------|--|--------------------------|
| <b>CNRVC170241</b> | 2017 | Yemen | Asia | ERR2269833 | CNRVC170241 |  | Weill et al. Nature 2019 |
| <b>CNRVC170240</b> | 2017 | Yemen | Asia | ERR2269832 | CNRVC170240 |  | Weill et al. Nature 2019 |
| <b>CNRVC170208</b> | 2017 | Yemen | Asia | ERR2269811 | CNRVC170208 |  | Weill et al. Nature 2019 |
| <b>CNRVC170207</b> | 2017 | Yemen | Asia | ERR2269810 | CNRVC170207 |  | Weill et al. Nature 2019 |
| <b>CNRVC170206</b> | 2017 | Yemen | Asia | ERR2269809 | CNRVC170206 |  | Weill et al. Nature 2019 |
| <b>CNRVC170205</b> | 2017 | Yemen | Asia | ERR2269718 | CNRVC170205 |  | Weill et al. Nature 2019 |
| <b>CNRVC170204</b> | 2017 | Yemen | Asia | ERR2269717 | CNRVC170204 |  | Weill et al. Nature 2019 |
| <b>CNRVC170203</b> | 2017 | Yemen | Asia | ERR2269716 | CNRVC170203 |  | Weill et al. Nature 2019 |
| <b>CNRVC170202</b> | 2017 | Yemen | Asia | ERR2269715 | CNRVC170202 |  | Weill et al. Nature 2019 |
| <b>CNRVC170201</b> | 2017 | Yemen | Asia | ERR2269714 | CNRVC170201 |  | Weill et al. Nature 2019 |
| <b>CNRVC170200</b> | 2017 | Yemen | Asia | ERR2269713 | CNRVC170200 |  | Weill et al. Nature 2019 |
| <b>CNRVC170199</b> | 2017 | Yemen | Asia | ERR2269712 | CNRVC170199 |  | Weill et al. Nature 2019 |
| <b>CNRVC170198</b> | 2017 | Yemen | Asia | ERR2269711 | CNRVC170198 |  | Weill et al. Nature 2019 |
| <b>CNRVC170197</b> | 2017 | Yemen | Asia | ERR2269710 | CNRVC170197 |  | Weill et al. Nature 2019 |
| <b>CNRVC170196</b> | 2017 | Yemen | Asia | ERR2269709 | CNRVC170196 |  | Weill et al. Nature 2019 |
| <b>CNRVC170195</b> | 2017 | Yemen | Asia | ERR2269650 | CNRVC170195 |  | Weill et al. Nature 2019 |
| <b>CNRVC170194</b> | 2017 | Yemen | Asia | ERR2269649 | CNRVC170194 |  | Weill et al. Nature 2019 |
| <b>CNRVC170193</b> | 2017 | Yemen | Asia | ERR2269648 | CNRVC170193 |  | Weill et al. Nature 2019 |
| <b>CNRVC170192</b> | 2017 | Yemen | Asia | ERR2269647 | CNRVC170192 |  | Weill et al. Nature 2019 |
| <b>CNRVC170191</b> | 2017 | Yemen | Asia | ERR2269646 | CNRVC170191 |  | Weill et al. Nature 2019 |
| <b>CNRVC170190</b> | 2017 | Yemen | Asia | ERR2269645 | CNRVC170190 |  | Weill et al. Nature 2019 |
| <b>CNRVC170189</b> | 2017 | Yemen | Asia | ERR2269644 | CNRVC170189 |  | Weill et al. Nature 2019 |
| <b>CNRVC170188</b> | 2017 | Yemen | Asia | ERR2269643 | CNRVC170188 |  | Weill et al. Nature 2019 |
| <b>CNRVC170187</b> | 2017 | Yemen | Asia | ERR2269642 | CNRVC170187 |  | Weill et al. Nature 2019 |
| <b>CNRVC170186</b> | 2017 | Yemen | Asia | ERR2269641 | CNRVC170186 |  | Weill et al. Nature 2019 |
| <b>CNRVC170185</b> | 2017 | Yemen | Asia | ERR2269640 | CNRVC170185 |  | Weill et al. Nature 2019 |
| <b>CNRVC170184</b> | 2017 | Yemen | Asia | ERR2269622 | CNRVC170184 |  | Weill et al. Nature 2019 |
| <b>CNRVC170183</b> | 2017 | Yemen | Asia | ERR2269621 | CNRVC170183 |  | Weill et al. Nature 2019 |

|                    |      |             |        |            |                         |  |                           |
|--------------------|------|-------------|--------|------------|-------------------------|--|---------------------------|
| <b>CNRVC170182</b> | 2017 | Yemen       | Asia   | ERR2269620 | CNRVC170182             |  | Weill et al. Nature 2019  |
| <b>CNRVC170181</b> | 2017 | Yemen       | Asia   | ERR2269619 | CNRVC170181             |  | Weill et al. Nature 2019  |
| <b>CNRVC170180</b> | 2017 | Yemen       | Asia   | ERR2269618 | CNRVC170180             |  | Weill et al. Nature 2019  |
| <b>CNRVC170179</b> | 2017 | Yemen       | Asia   | ERR2269617 | CNRVC170179             |  | Weill et al. Nature 2019  |
| <b>CNRVC170178</b> | 2017 | Yemen       | Asia   | ERR2269616 | CNRVC170178             |  | Weill et al. Nature 2019  |
| <b>CNRVC170177</b> | 2016 | Yemen       | Asia   | ERR2269615 | CNRVC170177             |  | Weill et al. Nature 2019  |
| <b>CNRVC170176</b> | 2016 | Yemen       | Asia   | ERR2269614 | CNRVC170176             |  | Weill et al. Nature 2019  |
| <b>CNRVC170175</b> | 2016 | Yemen       | Asia   | ERR2269613 | CNRVC170175             |  | Weill et al. Nature 2019  |
| <b>CNRVC170174</b> | 2016 | Yemen       | Asia   | ERR2265678 | CNRVC170174             |  | Weill et al. Nature 2019  |
| <b>CNRVC170173</b> | 2016 | Yemen       | Asia   | ERR2265677 | CNRVC170173             |  | Weill et al. Nature 2019  |
| <b>CNRVC170170</b> | 2016 | Yemen       | Asia   | ERR2265676 | CNRVC170170             |  | Weill et al. Nature 2019  |
| <b>CNRVC170169</b> | 2016 | Yemen       | Asia   | ERR2265675 | CNRVC170169             |  | Weill et al. Nature 2019  |
| <b>CNRVC170168</b> | 2016 | Yemen       | Asia   | ERR2265674 | CNRVC170168             |  | Weill et al. Nature 2019  |
| <b>CNRVC990299</b> | 1999 | Afghanistan | Asia   | ERR1879649 | CNRVC990299_CCGTCC_L001 |  | Weill et al. Science 2017 |
| <b>CNRVC990298</b> | 1999 | Afghanistan | Asia   | ERR1879648 | CNRVC990298_ATGTCA_L001 |  | Weill et al. Science 2017 |
| <b>CNRVC940149</b> | 1994 | Albania     | Europe | ERR1879577 | CNRVC940149_AGTCOA_L002 |  | Weill et al. Science 2017 |
| <b>CNRVC070154</b> | 1994 | Algeria     | Africa | ERR1878560 | CNRVC070154_GGCTAC_L001 |  | Weill et al. Science 2017 |
| <b>CNRVC070120</b> | 1994 | Algeria     | Africa | ERR1878555 | CNRVC070120_TAGCTT_L001 |  | Weill et al. Science 2017 |
| <b>CNRVC970008</b> | 1990 | Algeria     | Africa | ERR976476  | 16244_7_25              |  | Weill et al. Science 2017 |
| <b>CNRVC950418</b> | 1974 | Algeria     | Africa | ERR976444  | 16244_6_87              |  | Weill et al. Science 2017 |
| <b>CNRVC930187</b> | 1982 | Algeria     | Africa | ERR976413  | 16244_6_56              |  | Weill et al. Science 2017 |
| <b>CNRVC930172</b> | 1986 | Algeria     | Africa | ERR976412  | 16244_6_55              |  | Weill et al. Science 2017 |
| <b>CNRVC930169</b> | 1986 | Algeria     | Africa | ERR976409  | 16244_6_52              |  | Weill et al. Science 2017 |
| <b>CNRVC930168</b> | 1982 | Algeria     | Africa | ERR976408  | 16244_6_51              |  | Weill et al. Science 2017 |
| <b>CNRVC930167</b> | 1974 | Algeria     | Africa | ERR976407  | 16244_6_50              |  | Weill et al. Science 2017 |
| <b>CNRVC930166</b> | 1975 | Algeria     | Africa | ERR976406  | 16244_6_49              |  | Weill et al. Science 2017 |
| <b>CNRVC930164</b> | 1983 | Algeria     | Africa | ERR976405  | 16244_6_48              |  | Weill et al. Science 2017 |
| <b>CNRVC920172</b> | 1987 | Algeria     | Africa | ERR976395  | 16244_6_38              |  | Weill et al. Science 2017 |

|                      |      |        |        |            |                           |                           |
|----------------------|------|--------|--------|------------|---------------------------|---------------------------|
| <b>RKI-ZBS2-CH19</b> | 1972 | Angola | Africa | ERR1880793 | RKI-ZBS2-CH19_GCGCTA_L002 | Weill et al. Science 2017 |
| <b>CNRVC950002</b>   | 1995 | Angola | Africa | ERR998664  | 16356_8_9                 | Weill et al. Science 2017 |
| <b>CNRVC950007</b>   | 1995 | Angola | Africa | ERR998665  | 16356_8_10                | Weill et al. Science 2017 |
| <b>CNRVC940012</b>   | 1994 | Angola | Africa | ERR976533  | 16244_7_82                | Weill et al. Science 2017 |
| <b>CNRVC940011</b>   | 1994 | Angola | Africa | ERR976532  | 16244_7_81                | Weill et al. Science 2017 |
| <b>CNRVC920027</b>   | 1992 | Angola | Africa | ERR976522  | 16244_7_71                | Weill et al. Science 2017 |
| <b>CNRVC950569</b>   | 1970 | Angola | Africa | ERR976457  | 16244_7_6                 | Weill et al. Science 2017 |
| <b>CNRVC140132</b>   | 1988 | Angola | Africa | ERR976503  | 16244_7_52                | Weill et al. Science 2017 |
| <b>CNRVC140131</b>   | 1988 | Angola | Africa | ERR976502  | 16244_7_51                | Weill et al. Science 2017 |
| <b>CNRVC140130</b>   | 1988 | Angola | Africa | ERR976501  | 16244_7_50                | Weill et al. Science 2017 |
| <b>CNRVC950568</b>   | 1970 | Angola | Africa | ERR976456  | 16244_7_5                 | Weill et al. Science 2017 |
| <b>CNRVC140129</b>   | 1988 | Angola | Africa | ERR976500  | 16244_7_49                | Weill et al. Science 2017 |
| <b>CNRVC140128</b>   | 1988 | Angola | Africa | ERR976499  | 16244_7_48                | Weill et al. Science 2017 |
| <b>CNRVC140127</b>   | 1988 | Angola | Africa | ERR976498  | 16244_7_47                | Weill et al. Science 2017 |
| <b>CNRVC920194</b>   | 1990 | Angola | Africa | ERR976396  | 16244_6_39                | Weill et al. Science 2017 |
| <b>CNRVC900105</b>   | 1990 | Angola | Africa | ERR976391  | 16244_6_34                | Weill et al. Science 2017 |
| <b>CNRVC100183</b>   | 2010 | Benin  | Africa | ERR1878587 | CNRVC100183               | Weill et al. Science 2017 |
| <b>CNRVC100176</b>   | 2010 | Benin  | Africa | ERR1878586 | CNRVC100176               | Weill et al. Science 2017 |
| <b>CNRVC070164</b>   | 2007 | Benin  | Africa | ERR1878561 | CNRVC070164               | Weill et al. Science 2017 |
| <b>CNRVC050140</b>   | 2005 | Benin  | Africa | ERR1878134 | CNRVC050140               | Weill et al. Science 2017 |
| <b>CNRVC050139</b>   | 2005 | Benin  | Africa | ERR1878133 | CNRVC050139               | Weill et al. Science 2017 |
| <b>CNRVC040132</b>   | 2004 | Benin  | Africa | ERR1878110 | CNRVC040132               | Weill et al. Science 2017 |
| <b>CNRVC040127</b>   | 2004 | Benin  | Africa | ERR1878109 | CNRVC040127               | Weill et al. Science 2017 |
| <b>CNRVC030084</b>   | 2003 | Benin  | Africa | ERR1878092 | CNRVC030084               | Weill et al. Science 2017 |
| <b>CNRVC030082</b>   | 2003 | Benin  | Africa | ERR1878091 | CNRVC030082               | Weill et al. Science 2017 |
| <b>CNRVC020367</b>   | 2002 | Benin  | Africa | ERR1877957 | CNRVC020367               | Weill et al. Science 2017 |
| <b>CNRVC020361</b>   | 2002 | Benin  | Africa | ERR1877956 | CNRVC020361               | Weill et al. Science 2017 |
| <b>CNRVC970152</b>   | 1997 | Benin  | Africa | ERR998750  | 16356_8_95                | Weill et al. Science 2017 |

|                    |      |              |        |            |                         |  |                           |
|--------------------|------|--------------|--------|------------|-------------------------|--|---------------------------|
| <b>CNRVC970147</b> | 1997 | Benin        | Africa | ERR998749  | 16356_8_94              |  | Weill et al. Science 2017 |
| <b>CNRVC960579</b> | 1970 | Benin        | Africa | ERR976460  | 16244_7_9               |  | Weill et al. Science 2017 |
| <b>CNRVC960575</b> | 1970 | Benin        | Africa | ERR976459  | 16244_7_8               |  | Weill et al. Science 2017 |
| <b>CNRVC910267</b> | 1991 | Benin        | Africa | ERR976515  | 16244_7_64              |  | Weill et al. Science 2017 |
| <b>CNRVC910266</b> | 1991 | Benin        | Africa | ERR976514  | 16244_7_63              |  | Weill et al. Science 2017 |
| <b>CNRVC910036</b> | 1991 | Benin        | Africa | ERR976513  | 16244_7_62              |  | Weill et al. Science 2017 |
| <b>CNRVC980046</b> | 1985 | Benin        | Africa | ERR976483  | 16244_7_32              |  | Weill et al. Science 2017 |
| <b>CNRVC990234</b> | 1999 | Burkina Faso | Africa | ERR1879646 | CNRVC990234_CTATAC_L002 |  | Weill et al. Science 2017 |
| <b>CNRVC070334</b> | 2005 | Burkina Faso | Africa | ERR1878563 | CNRVC070334             |  | Weill et al. Science 2017 |
| <b>CNRVC070316</b> | 2005 | Burkina Faso | Africa | ERR1878562 | CNRVC070316             |  | Weill et al. Science 2017 |
| <b>CNRVC010206</b> | 2001 | Burkina Faso | Africa | ERR1877949 | CNRVC010206             |  | Weill et al. Science 2017 |
| <b>CNRVC010205</b> | 2001 | Burkina Faso | Africa | ERR1877948 | CNRVC010205             |  | Weill et al. Science 2017 |
| <b>CNRVC950806</b> | 1995 | Burkina Faso | Africa | ERR998688  | 16356_8_33              |  | Weill et al. Science 2017 |
| <b>CNRVC950801</b> | 1995 | Burkina Faso | Africa | ERR998687  | 16356_8_32              |  | Weill et al. Science 2017 |
| <b>CNRVC950702</b> | 1995 | Burkina Faso | Africa | ERR998672  | 16356_8_17              |  | Weill et al. Science 2017 |
| <b>CNRVC950700</b> | 1995 | Burkina Faso | Africa | ERR998671  | 16356_8_16              |  | Weill et al. Science 2017 |
| <b>CNRVC980360</b> | 1998 | Burkina Faso | Africa | ERR976573  | 16244_8_27              |  | Weill et al. Science 2017 |
| <b>CNRVC980359</b> | 1998 | Burkina Faso | Africa | ERR976572  | 16244_8_26              |  | Weill et al. Science 2017 |
| <b>CNRVC980049</b> | 1984 | Burkina Faso | Africa | ERR976486  | 16244_7_35              |  | Weill et al. Science 2017 |
| <b>CNRVC980048</b> | 1984 | Burkina Faso | Africa | ERR976485  | 16244_7_34              |  | Weill et al. Science 2017 |
| <b>CNRVC980040</b> | 1984 | Burkina Faso | Africa | ERR976479  | 16244_7_28              |  | Weill et al. Science 2017 |
| <b>CNRVC950405</b> | 1974 | Burkina Faso | Africa | ERR976443  | 16244_6_86              |  | Weill et al. Science 2017 |
| <b>CNRVC950396</b> | 1974 | Burkina Faso | Africa | ERR976442  | 16244_6_85              |  | Weill et al. Science 2017 |
| <b>CNRVC950106</b> | 1974 | Burkina Faso | Africa | ERR976419  | 16244_6_62              |  | Weill et al. Science 2017 |
| <b>CNRVC950105</b> | 1974 | Burkina Faso | Africa | ERR976418  | 16244_6_61              |  | Weill et al. Science 2017 |
| <b>CNRVC970056</b> | 1997 | Burundi      | Africa | ERR1879636 | CNRVC970056_CATTTT_L002 |  | Weill et al. Science 2017 |
| <b>CNRVC010062</b> | 2001 | Burundi      | Africa | ERR1877942 | CNRVC010062             |  | Weill et al. Science 2017 |
| <b>CNRVC010061</b> | 2001 | Burundi      | Africa | ERR1877941 | CNRVC010061             |  | Weill et al. Science 2017 |

|                    |      |          |        |            |                         |                           |
|--------------------|------|----------|--------|------------|-------------------------|---------------------------|
| <b>C8466</b>       | 1992 | Burundi  | Africa | ERR1877618 | CDCC8466_rep            | Weill et al. Science 2017 |
| <b>C8465</b>       | 1992 | Burundi  | Africa | ERR1877617 | CDCC8465_rep            | Weill et al. Science 2017 |
| <b>CNRVC930425</b> | 1993 | Burundi  | Africa | ERR976530  | 16244_7_79              | Weill et al. Science 2017 |
| <b>CNRVC930417</b> | 1993 | Burundi  | Africa | ERR976529  | 16244_7_78              | Weill et al. Science 2017 |
| <b>CNRVC990194</b> | 1999 | Cambodia | Asia   | ERR1879644 | CNRVC990194_CGGAAT_L002 | Weill et al. Science 2017 |
| <b>CNRVC930067</b> | 1963 | Cambodia | Asia   | ERR1879567 | CNRVC930067_GCCAAT_L002 | Weill et al. Science 2017 |
| <b>CNRVC910040</b> | 1991 | Cambodia | Asia   | ERR1879548 | CNRVC910040_CAGATC_L001 | Weill et al. Science 2017 |
| <b>CNRVC150239</b> | 1993 | Cambodia | Asia   | ERR1879538 | CNRVC150239_CGGAAT_L001 | Weill et al. Science 2017 |
| <b>CNRVC990329</b> | 1999 | Cameroon | Africa | ERR1879650 | CNRVC990329_CGATGT_L001 | Weill et al. Science 2017 |
| <b>CNRVC110128</b> | 2010 | Cameroon | Africa | ERR1878598 | CNRVC110128             | Weill et al. Science 2017 |
| <b>CNRVC110120</b> | 2011 | Cameroon | Africa | ERR1878597 | CNRVC110120             | Weill et al. Science 2017 |
| <b>CNRVC110113</b> | 2011 | Cameroon | Africa | ERR1878596 | CNRVC110113             | Weill et al. Science 2017 |
| <b>CNRVC110096</b> | 2010 | Cameroon | Africa | ERR1878595 | CNRVC110096             | Weill et al. Science 2017 |
| <b>CNRVC100186</b> | 2010 | Cameroon | Africa | ERR1878588 | CNRVC100186             | Weill et al. Science 2017 |
| <b>CNRVC090182</b> | 2009 | Cameroon | Africa | ERR1878580 | CNRVC090182             | Weill et al. Science 2017 |
| <b>CNRVC080764</b> | 2008 | Cameroon | Africa | ERR1878574 | CNRVC080764             | Weill et al. Science 2017 |
| <b>CNRVC080762</b> | 2008 | Cameroon | Africa | ERR1878573 | CNRVC080762             | Weill et al. Science 2017 |
| <b>CNRVC060111</b> | 2006 | Cameroon | Africa | ERR1878152 | CNRVC060111             | Weill et al. Science 2017 |
| <b>CNRVC050011</b> | 2005 | Cameroon | Africa | ERR1878129 | CNRVC050011             | Weill et al. Science 2017 |
| <b>CNRVC050008</b> | 2005 | Cameroon | Africa | ERR1878128 | CNRVC050008             | Weill et al. Science 2017 |
| <b>CNRVC040110</b> | 2004 | Cameroon | Africa | ERR1878108 | CNRVC040110             | Weill et al. Science 2017 |
| <b>CNRVC040082</b> | 2002 | Cameroon | Africa | ERR1878107 | CNRVC040082             | Weill et al. Science 2017 |
| <b>CNRVC040074</b> | 2001 | Cameroon | Africa | ERR1878106 | CNRVC040074             | Weill et al. Science 2017 |
| <b>CNRVC040061</b> | 2004 | Cameroon | Africa | ERR1878105 | CNRVC040061             | Weill et al. Science 2017 |
| <b>CNRVC010221</b> | 2001 | Cameroon | Africa | ERR1877950 | CNRVC010221             | Weill et al. Science 2017 |
| <b>CNRVC010023</b> | 2000 | Cameroon | Africa | ERR1877645 | CNRVC010023             | Weill et al. Science 2017 |
| <b>CNRVC000323</b> | 2000 | Cameroon | Africa | ERR1877643 | CNRVC000323             | Weill et al. Science 2017 |
| <b>F135</b>        | 1993 | Cameroon | Africa | ERR1879651 | CDCF135_rep             | Weill et al. Science 2017 |



|                    |      |                          |        |            |             |  |                           |
|--------------------|------|--------------------------|--------|------------|-------------|--|---------------------------|
| <b>CNRVC970036</b> | 1997 | Cameroon                 | Africa | ERR998731  | 16356_8_76  |  | Weill et al. Science 2017 |
| <b>CNRVC970024</b> | 1997 | Cameroon                 | Africa | ERR998728  | 16356_8_73  |  | Weill et al. Science 2017 |
| <b>CNRVC970022</b> | 1997 | Cameroon                 | Africa | ERR998727  | 16356_8_72  |  | Weill et al. Science 2017 |
| <b>CNRVC970019</b> | 1997 | Cameroon                 | Africa | ERR998726  | 16356_8_71  |  | Weill et al. Science 2017 |
| <b>CNRVC970014</b> | 1997 | Cameroon                 | Africa | ERR998725  | 16356_8_70  |  | Weill et al. Science 2017 |
| <b>CNRVC960293</b> | 1996 | Cameroon                 | Africa | ERR998712  | 16356_8_57  |  | Weill et al. Science 2017 |
| <b>CNRVC960246</b> | 1996 | Cameroon                 | Africa | ERR998703  | 16356_8_48  |  | Weill et al. Science 2017 |
| <b>CNRVC950011</b> | 1995 | Cameroon                 | Africa | ERR998666  | 16356_8_11  |  | Weill et al. Science 2017 |
| <b>CNRVC980022</b> | 1997 | Cameroon                 | Africa | ERR976555  | 16244_8_9   |  | Weill et al. Science 2017 |
| <b>CNRVC980021</b> | 1997 | Cameroon                 | Africa | ERR976554  | 16244_8_8   |  | Weill et al. Science 2017 |
| <b>CNRVC980398</b> | 1998 | Cameroon                 | Africa | ERR976579  | 16244_8_33  |  | Weill et al. Science 2017 |
| <b>CNRVC980397</b> | 1998 | Cameroon                 | Africa | ERR976578  | 16244_8_32  |  | Weill et al. Science 2017 |
| <b>CNRVC980396</b> | 1998 | Cameroon                 | Africa | ERR976577  | 16244_8_31  |  | Weill et al. Science 2017 |
| <b>CNRVC980395</b> | 1998 | Cameroon                 | Africa | ERR976576  | 16244_8_30  |  | Weill et al. Science 2017 |
| <b>CNRVC980328</b> | 1998 | Cameroon                 | Africa | ERR976570  | 16244_8_24  |  | Weill et al. Science 2017 |
| <b>CNRVC980323</b> | 1998 | Cameroon                 | Africa | ERR976568  | 16244_8_22  |  | Weill et al. Science 2017 |
| <b>CNRVC980061</b> | 1998 | Cameroon                 | Africa | ERR976562  | 16244_8_16  |  | Weill et al. Science 2017 |
| <b>CNRVC980060</b> | 1998 | Cameroon                 | Africa | ERR976561  | 16244_8_15  |  | Weill et al. Science 2017 |
| <b>CNRVC950143</b> | 1970 | Cameroon                 | Africa | ERR976424  | 16244_6_67  |  | Weill et al. Science 2017 |
| <b>CNRVC950142</b> | 1970 | Cameroon                 | Africa | ERR976423  | 16244_6_66  |  | Weill et al. Science 2017 |
| <b>CNRVC950141</b> | 1970 | Cameroon                 | Africa | ERR976422  | 16244_6_65  |  | Weill et al. Science 2017 |
| <b>CNRVC950140</b> | 1970 | Cameroon                 | Africa | ERR976421  | 16244_6_64  |  | Weill et al. Science 2017 |
| <b>CNRVC950138</b> | 1970 | Cameroon                 | Africa | ERR976420  | 16244_6_63  |  | Weill et al. Science 2017 |
| <b>CNRVC930042</b> | 1970 | Cameroon                 | Africa | ERR976400  | 16244_6_43  |  | Weill et al. Science 2017 |
| <b>CNRVC110272</b> | 2011 | Central African Republic | Africa | ERR1878603 | CNRVC110272 |  | Weill et al. Science 2017 |
| <b>CNRVC110266</b> | 2011 | Central African Republic | Africa | ERR1878602 | CNRVC110266 |  | Weill et al. Science 2017 |
| <b>CNRVC970143</b> | 1997 | Central African Republic | Africa | ERR998748  | 16356_8_93  |  | Weill et al. Science 2017 |

|                    |      |                          |        |            |                         |  |                           |
|--------------------|------|--------------------------|--------|------------|-------------------------|--|---------------------------|
| <b>CNRVC970141</b> | 1997 | Central African Republic | Africa | ERR998747  | 16356_8_92              |  | Weill et al. Science 2017 |
| <b>CNRVC970127</b> | 1997 | Central African Republic | Africa | ERR998745  | 16356_8_90              |  | Weill et al. Science 2017 |
| <b>CNRVC970126</b> | 1997 | Central African Republic | Africa | ERR998744  | 16356_8_89              |  | Weill et al. Science 2017 |
| <b>CNRVC970125</b> | 1997 | Central African Republic | Africa | ERR998743  | 16356_8_88              |  | Weill et al. Science 2017 |
| <b>CNRVC970123</b> | 1997 | Central African Republic | Africa | ERR998742  | 16356_8_87              |  | Weill et al. Science 2017 |
| <b>CNRVC970112</b> | 1997 | Central African Republic | Africa | ERR998740  | 16356_8_85              |  | Weill et al. Science 2017 |
| <b>CNRVC970110</b> | 1997 | Central African Republic | Africa | ERR998739  | 16356_8_84              |  | Weill et al. Science 2017 |
| <b>CNRVC970109</b> | 1997 | Central African Republic | Africa | ERR998738  | 16356_8_83              |  | Weill et al. Science 2017 |
| <b>CNRVC970108</b> | 1997 | Central African Republic | Africa | ERR998737  | 16356_8_82              |  | Weill et al. Science 2017 |
| <b>CNRVC970079</b> | 1997 | Central African Republic | Africa | ERR998736  | 16356_8_81              |  | Weill et al. Science 2017 |
| <b>CNRVC970075</b> | 1997 | Central African Republic | Africa | ERR998735  | 16356_8_80              |  | Weill et al. Science 2017 |
| <b>CNRVC980374</b> | 1998 | Chad                     | Africa | ERR1879638 | CNRVC980374_TCCCGA_L002 |  | Weill et al. Science 2017 |
| <b>CNRVC110241</b> | 2011 | Chad                     | Africa | ERR1878600 | CNRVC110241             |  | Weill et al. Science 2017 |
| <b>CNRVC110230</b> | 2011 | Chad                     | Africa | ERR1878599 | CNRVC110230             |  | Weill et al. Science 2017 |
| <b>CNRVC100246</b> | 2010 | Chad                     | Africa | ERR1878591 | CNRVC100246             |  | Weill et al. Science 2017 |
| <b>CNRVC100240</b> | 2010 | Chad                     | Africa | ERR1878590 | CNRVC100240             |  | Weill et al. Science 2017 |
| <b>CNRVC010203</b> | 2001 | Chad                     | Africa | ERR1877947 | CNRVC010203             |  | Weill et al. Science 2017 |
| <b>CNRVC010123</b> | 2001 | Chad                     | Africa | ERR1877946 | CNRVC010123_ACTTGA_L001 |  | Weill et al. Science 2017 |
| <b>CNRVC010120</b> | 2001 | Chad                     | Africa | ERR1877945 | CNRVC010120             |  | Weill et al. Science 2017 |
| <b>CNRVC940184</b> | 1994 | Chad                     | Africa | ERR998662  | 16356_8_7               |  | Weill et al. Science 2017 |
| <b>CNRVC960273</b> | 1996 | Chad                     | Africa | ERR998711  | 16356_8_56              |  | Weill et al. Science 2017 |
| <b>CNRVC960265</b> | 1996 | Chad                     | Africa | ERR998708  | 16356_8_53              |  | Weill et al. Science 2017 |
| <b>CNRVC960243</b> | 1996 | Chad                     | Africa | ERR998702  | 16356_8_47              |  | Weill et al. Science 2017 |
| <b>CNRVC960234</b> | 1996 | Chad                     | Africa | ERR998701  | 16356_8_46              |  | Weill et al. Science 2017 |
| <b>CNRVC960228</b> | 1996 | Chad                     | Africa | ERR998700  | 16356_8_45              |  | Weill et al. Science 2017 |
| <b>CNRVC940163</b> | 1994 | Chad                     | Africa | ERR998656  | 16356_8_1               |  | Weill et al. Science 2017 |

|                    |      |               |        |            |                         |  |                           |
|--------------------|------|---------------|--------|------------|-------------------------|--|---------------------------|
| <b>CNRVC950366</b> | 1974 | Chad          | Africa | ERR976440  | 16244_6_83              |  | Weill et al. Science 2017 |
| <b>CNRVC950364</b> | 1972 | Chad          | Africa | ERR976439  | 16244_6_82              |  | Weill et al. Science 2017 |
| <b>CNRVC950360</b> | 1974 | Chad          | Africa | ERR976438  | 16244_6_81              |  | Weill et al. Science 2017 |
| <b>CNRVC950358</b> | 1974 | Chad          | Africa | ERR976437  | 16244_6_80              |  | Weill et al. Science 2017 |
| <b>CNRVC950087</b> | 1972 | Chad          | Africa | ERR976416  | 16244_6_59              |  | Weill et al. Science 2017 |
| <b>CNRVC950040</b> | 1972 | Chad          | Africa | ERR976415  | 16244_6_58              |  | Weill et al. Science 2017 |
| <b>CNRVC930046</b> | 1971 | Chad          | Africa | ERR976401  | 16244_6_44              |  | Weill et al. Science 2017 |
| <b>CNRVC930061</b> | 1961 | China         | Asia   | ERR1879565 | CNRVC930061_TGACCA_L002 |  | Weill et al. Science 2017 |
| <b>CNRVC030594</b> | 2003 | Comoros       | Africa | ERR1878104 | CNRVC030594             |  | Weill et al. Science 2017 |
| <b>CNRVC030593</b> | 2003 | Comoros       | Africa | ERR1878103 | CNRVC030593             |  | Weill et al. Science 2017 |
| <b>CNRVC020003</b> | 2002 | Comoros       | Africa | ERR1877953 | CNRVC020003             |  | Weill et al. Science 2017 |
| <b>CNRVC010045</b> | 2001 | Comoros       | Africa | ERR1877648 | CNRVC010045             |  | Weill et al. Science 2017 |
| <b>CNRVC010008</b> | 2001 | Comoros       | Africa | ERR1877644 | CNRVC010008_GCCAAT_L001 |  | Weill et al. Science 2017 |
| <b>CNRVC000085</b> | 2000 | Comoros       | Africa | ERR1877640 | CNRVC000085             |  | Weill et al. Science 2017 |
| <b>CNRVC980029</b> | 1998 | Comoros       | Africa | ERR976558  | 16244_8_12              |  | Weill et al. Science 2017 |
| <b>CNRVC980026</b> | 1998 | Comoros       | Africa | ERR976557  | 16244_8_11              |  | Weill et al. Science 2017 |
| <b>CNRVC980023</b> | 1998 | Comoros       | Africa | ERR976556  | 16244_8_10              |  | Weill et al. Science 2017 |
| <b>CNRVC950543</b> | 1975 | Comoros       | Africa | ERR976453  | 16244_7_2               |  | Weill et al. Science 2017 |
| <b>CNRVC950540</b> | 1975 | Comoros       | Africa | ERR976452  | 16244_7_1               |  | Weill et al. Science 2017 |
| <b>CNRVC950535</b> | 1975 | Comoros       | Africa | ERR976451  | 16244_6_94              |  | Weill et al. Science 2017 |
| <b>CNRVC150245</b> | 1988 | Cote d'Ivoire | Africa | ERR1879542 | CNRVC150245_GCGCTA_L001 |  | Weill et al. Science 2017 |
| <b>CNRVC150231</b> | 1988 | Cote d'Ivoire | Africa | ERR1879535 | CNRVC150231_CATGGC_L001 |  | Weill et al. Science 2017 |
| <b>CNRVC150227</b> | 1988 | Cote d'Ivoire | Africa | ERR1879435 | CNRVC150227_CACCGG_L001 |  | Weill et al. Science 2017 |
| <b>CNRVC150210</b> | 1988 | Cote d'Ivoire | Africa | ERR1879384 | CNRVC150210_AGTCAA_L001 |  | Weill et al. Science 2017 |
| <b>CNRVC080497</b> | 2006 | Cote d'Ivoire | Africa | ERR1878572 | CNRVC080497             |  | Weill et al. Science 2017 |
| <b>CNRVC080496</b> | 2006 | Cote d'Ivoire | Africa | ERR1878571 | CNRVC080496             |  | Weill et al. Science 2017 |
| <b>CNRVC030567</b> | 2003 | Cote d'Ivoire | Africa | ERR1878102 | CNRVC030567             |  | Weill et al. Science 2017 |
| <b>CNRVC030485</b> | 2003 | Cote d'Ivoire | Africa | ERR1878100 | CNRVC030485             |  | Weill et al. Science 2017 |

|                    |      |                                  |        |            |                         |                           |
|--------------------|------|----------------------------------|--------|------------|-------------------------|---------------------------|
| <b>CNRVC020404</b> | 2002 | Cote d'Ivoire                    | Africa | ERR1878089 | CNRVC020404             | Weill et al. Science 2017 |
| <b>CNRVC010042</b> | 2001 | Cote d'Ivoire                    | Africa | ERR1877647 | CNRVC010042             | Weill et al. Science 2017 |
| <b>CNRVC010038</b> | 2001 | Cote d'Ivoire                    | Africa | ERR1877646 | CNRVC010038_CAGATC_L001 | Weill et al. Science 2017 |
| <b>CNRVC950758</b> | 1995 | Cote d'Ivoire                    | Africa | ERR998685  | 16356_8_30              | Weill et al. Science 2017 |
| <b>CNRVC950756</b> | 1995 | Cote d'Ivoire                    | Africa | ERR998684  | 16356_8_29              | Weill et al. Science 2017 |
| <b>CNRVC950755</b> | 1995 | Cote d'Ivoire                    | Africa | ERR998683  | 16356_8_28              | Weill et al. Science 2017 |
| <b>CNRVC950753</b> | 1995 | Cote d'Ivoire                    | Africa | ERR998682  | 16356_8_27              | Weill et al. Science 2017 |
| <b>CNRVC980421</b> | 1998 | Cote d'Ivoire                    | Africa | ERR976582  | 16244_8_36              | Weill et al. Science 2017 |
| <b>CNRVC980420</b> | 1998 | Cote d'Ivoire                    | Africa | ERR976581  | 16244_8_35              | Weill et al. Science 2017 |
| <b>CNRVC940035</b> | 1993 | Cote d'Ivoire                    | Africa | ERR976536  | 16244_7_85              | Weill et al. Science 2017 |
| <b>CNRVC940034</b> | 1994 | Cote d'Ivoire                    | Africa | ERR976535  | 16244_7_84              | Weill et al. Science 2017 |
| <b>CNRVC940030</b> | 1993 | Cote d'Ivoire                    | Africa | ERR976534  | 16244_7_83              | Weill et al. Science 2017 |
| <b>CNRVC960552</b> | 1970 | Cote d'Ivoire                    | Africa | ERR976458  | 16244_7_7               | Weill et al. Science 2017 |
| <b>CNRVC910375</b> | 1991 | Cote d'Ivoire                    | Africa | ERR976519  | 16244_7_68              | Weill et al. Science 2017 |
| <b>CNRVC140141</b> | 1988 | Cote d'Ivoire                    | Africa | ERR976512  | 16244_7_61              | Weill et al. Science 2017 |
| <b>CNRVC140140</b> | 1988 | Cote d'Ivoire                    | Africa | ERR976511  | 16244_7_60              | Weill et al. Science 2017 |
| <b>CNRVC950203</b> | 1970 | Cote d'Ivoire                    | Africa | ERR976428  | 16244_6_71              | Weill et al. Science 2017 |
| <b>CNRVC950191</b> | 1973 | Cote d'Ivoire                    | Africa | ERR976427  | 16244_6_70              | Weill et al. Science 2017 |
| <b>CNRVC950189</b> | 1973 | Cote d'Ivoire                    | Africa | ERR976426  | 16244_6_69              | Weill et al. Science 2017 |
| <b>CNRVC950182</b> | 1973 | Cote d'Ivoire                    | Africa | ERR976425  | 16244_6_68              | Weill et al. Science 2017 |
| <b>CNRVC930171</b> | 1984 | Cote d'Ivoire                    | Africa | ERR976411  | 16244_6_54              | Weill et al. Science 2017 |
| <b>CNRVC140013</b> | 2014 | Democratic Republic of the Congo | Africa | ERR1878608 | CNRVC140013             | Weill et al. Science 2017 |
| <b>CNRVC140012</b> | 2014 | Democratic Republic of the Congo | Africa | ERR1878607 | CNRVC140012             | Weill et al. Science 2017 |
| <b>CNRVC080370</b> | 2008 | Democratic Republic of the Congo | Africa | ERR1878568 | CNRVC080370             | Weill et al. Science 2017 |
| <b>CNRVC080133</b> | 2008 | Democratic Republic of the Congo | Africa | ERR1878567 | CNRVC080133             | Weill et al. Science 2017 |
| <b>CNRVC070530</b> | 2007 | Democratic Republic of the Congo | Africa | ERR1878564 | CNRVC070530             | Weill et al. Science 2017 |
| <b>CNRVC070045</b> | 2007 | Democratic Republic of the Congo | Africa | ERR1878552 | CNRVC070045             | Weill et al. Science 2017 |

|                    |      |                                  |        |            |                         |  |                           |
|--------------------|------|----------------------------------|--------|------------|-------------------------|--|---------------------------|
| <b>CNRVC060153</b> | 2006 | Democratic Republic of the Congo | Africa | ERR1878155 | CNRVC060153             |  | Weill et al. Science 2017 |
| <b>CNRVC060003</b> | 2006 | Democratic Republic of the Congo | Africa | ERR1878148 | CNRVC060003             |  | Weill et al. Science 2017 |
| <b>CNRVC050284</b> | 2005 | Democratic Republic of the Congo | Africa | ERR1878136 | CNRVC050284             |  | Weill et al. Science 2017 |
| <b>CNRVC050077</b> | 2005 | Democratic Republic of the Congo | Africa | ERR1878132 | CNRVC050077             |  | Weill et al. Science 2017 |
| <b>CNRVC040299</b> | 2004 | Democratic Republic of the Congo | Africa | ERR1878116 | CNRVC040299             |  | Weill et al. Science 2017 |
| <b>CNRVC030519</b> | 2002 | Democratic Republic of the Congo | Africa | ERR1878101 | CNRVC030519             |  | Weill et al. Science 2017 |
| <b>CNRVC030469</b> | 2003 | Democratic Republic of the Congo | Africa | ERR1878097 | CNRVC030469             |  | Weill et al. Science 2017 |
| <b>CNRVC030293</b> | 2003 | Democratic Republic of the Congo | Africa | ERR1878093 | CNRVC030293             |  | Weill et al. Science 2017 |
| <b>CNRVC030032</b> | 2003 | Democratic Republic of the Congo | Africa | ERR1878090 | CNRVC030032             |  | Weill et al. Science 2017 |
| <b>CNRVC020284</b> | 2002 | Democratic Republic of the Congo | Africa | ERR1877955 | CNRVC020284             |  | Weill et al. Science 2017 |
| <b>CNRVC010254</b> | 2001 | Democratic Republic of the Congo | Africa | ERR1877952 | CNRVC010254             |  | Weill et al. Science 2017 |
| <b>CNRVC010243</b> | 2001 | Democratic Republic of the Congo | Africa | ERR1877951 | CNRVC010243_GATCAG_L001 |  | Weill et al. Science 2017 |
| <b>CNRVC970135</b> | 1997 | Democratic Republic of the Congo | Africa | ERR998746  | 16356_8_91              |  | Weill et al. Science 2017 |
| <b>CNRVC970113</b> | 1997 | Democratic Republic of the Congo | Africa | ERR998741  | 16356_8_86              |  | Weill et al. Science 2017 |
| <b>CNRVC970064</b> | 1997 | Democratic Republic of the Congo | Africa | ERR998734  | 16356_8_79              |  | Weill et al. Science 2017 |
| <b>CNRVC970058</b> | 1997 | Democratic Republic of the Congo | Africa | ERR998733  | 16356_8_78              |  | Weill et al. Science 2017 |
| <b>CNRVC970028</b> | 1997 | Democratic Republic of the Congo | Africa | ERR998730  | 16356_8_75              |  | Weill et al. Science 2017 |
| <b>CNRVC970027</b> | 1997 | Democratic Republic of the Congo | Africa | ERR998729  | 16356_8_74              |  | Weill et al. Science 2017 |
| <b>CNRVC970007</b> | 1997 | Democratic Republic of the Congo | Africa | ERR998724  | 16356_8_69              |  | Weill et al. Science 2017 |
| <b>CNRVC970004</b> | 1997 | Democratic Republic of the Congo | Africa | ERR998723  | 16356_8_68              |  | Weill et al. Science 2017 |
| <b>CNRVC960308</b> | 1996 | Democratic Republic of the Congo | Africa | ERR998714  | 16356_8_59              |  | Weill et al. Science 2017 |
| <b>CNRVC960218</b> | 1996 | Democratic Republic of the Congo | Africa | ERR998698  | 16356_8_43              |  | Weill et al. Science 2017 |
| <b>CNRVC960127</b> | 1996 | Democratic Republic of the Congo | Africa | ERR998697  | 16356_8_42              |  | Weill et al. Science 2017 |
| <b>CNRVC960124</b> | 1996 | Democratic Republic of the Congo | Africa | ERR998696  | 16356_8_41              |  | Weill et al. Science 2017 |

|                    |           |                                  |        |           |            |  |                           |
|--------------------|-----------|----------------------------------|--------|-----------|------------|--|---------------------------|
| <b>CNRVC940173</b> | 1994      | Democratic Republic of the Congo | Africa | ERR998659 | 16356_8_4  |  | Weill et al. Science 2017 |
| <b>CNRVC960118</b> | 1996      | Democratic Republic of the Congo | Africa | ERR998694 | 16356_8_39 |  | Weill et al. Science 2017 |
| <b>CNRVC950746</b> | 1995      | Democratic Republic of the Congo | Africa | ERR998681 | 16356_8_26 |  | Weill et al. Science 2017 |
| <b>CNRVC950695</b> | 1995      | Democratic Republic of the Congo | Africa | ERR998669 | 16356_8_14 |  | Weill et al. Science 2017 |
| <b>CNRVC950694</b> | 1995      | Democratic Republic of the Congo | Africa | ERR998668 | 16356_8_13 |  | Weill et al. Science 2017 |
| <b>CNRVC950693</b> | 1995      | Democratic Republic of the Congo | Africa | ERR998667 | 16356_8_12 |  | Weill et al. Science 2017 |
| <b>CNRVC970176</b> | 1997      | Democratic Republic of the Congo | Africa | ERR976550 | 16244_8_4  |  | Weill et al. Science 2017 |
| <b>CNRVC970174</b> | 1997      | Democratic Republic of the Congo | Africa | ERR976548 | 16244_8_2  |  | Weill et al. Science 2017 |
| <b>CNRVC940143</b> | 1994      | Democratic Republic of the Congo | Africa | ERR976544 | 16244_7_93 |  | Weill et al. Science 2017 |
| <b>CNRVC940131</b> | 1994      | Democratic Republic of the Congo | Africa | ERR976540 | 16244_7_89 |  | Weill et al. Science 2017 |
| <b>CNRVC930185</b> | 1993      | Democratic Republic of the Congo | Africa | ERR976526 | 16244_7_75 |  | Weill et al. Science 2017 |
| <b>CNRVC930153</b> | 1993      | Democratic Republic of the Congo | Africa | ERR976525 | 16244_7_74 |  | Weill et al. Science 2017 |
| <b>CNRVC920169</b> | 1992      | Democratic Republic of the Congo | Africa | ERR976524 | 16244_7_73 |  | Weill et al. Science 2017 |
| <b>CNRVC910429</b> | 1991      | Democratic Republic of the Congo | Africa | ERR976521 | 16244_7_70 |  | Weill et al. Science 2017 |
| <b>CNRVC980050</b> | 1984_1986 | Democratic Republic of the Congo | Africa | ERR976487 | 16244_7_36 |  | Weill et al. Science 2017 |
| <b>CNRVC980047</b> | 1988      | Democratic Republic of the Congo | Africa | ERR976484 | 16244_7_33 |  | Weill et al. Science 2017 |
| <b>CNRVC930170</b> | 1984      | Democratic Republic of the Congo | Africa | ERR976410 | 16244_6_53 |  | Weill et al. Science 2017 |
| <b>CNRVC930163</b> | 1988      | Democratic Republic of the Congo | Africa | ERR976404 | 16244_6_47 |  | Weill et al. Science 2017 |
| <b>L384</b>        | 2013      | Democratic Republic of the Congo | Africa | ERR572837 | 12971_7_75 |  | Weill et al. Science 2017 |
| <b>L377</b>        | 2013      | Democratic Republic of the Congo | Africa | ERR572836 | 12971_7_74 |  | Weill et al. Science 2017 |
| <b>L354</b>        | 2011      | Democratic Republic of the Congo | Africa | ERR572821 | 12971_7_59 |  | Weill et al. Science 2017 |
| <b>L342</b>        | 2001      | Democratic Republic of the Congo | Africa | ERR572810 | 12971_7_48 |  | Weill et al. Science 2017 |
| <b>L339</b>        | 2012      | Democratic Republic of the Congo | Africa | ERR572807 | 12971_7_45 |  | Weill et al. Science 2017 |
| <b>L310</b>        | 2011      | Democratic Republic of the Congo | Africa | ERR572781 | 12971_7_19 |  | Weill et al. Science 2017 |

|                    |      |                                  |        |            |                         |  |                           |
|--------------------|------|----------------------------------|--------|------------|-------------------------|--|---------------------------|
| <b>L300</b>        | 2011 | Democratic Republic of the Congo | Africa | ERR572772  | 12971_7_10              |  | Weill et al. Science 2017 |
| <b>L284</b>        | 2008 | Democratic Republic of the Congo | Africa | ERR572757  | 12971_6_75              |  | Weill et al. Science 2017 |
| <b>L283</b>        | 2008 | Democratic Republic of the Congo | Africa | ERR572756  | 12971_6_74              |  | Weill et al. Science 2017 |
| <b>L372</b>        | 2013 | Democratic Republic of the Congo | Africa | ERR572563  | 12971_4_50              |  | Weill et al. Science 2017 |
| <b>L363</b>        | 2013 | Democratic Republic of the Congo | Africa | ERR572559  | 12971_4_46              |  | Weill et al. Science 2017 |
| <b>L184</b>        | 2012 | Democratic Republic of the Congo | Africa | ERR572548  | 12971_4_35              |  | Weill et al. Science 2017 |
| <b>L78</b>         | 2009 | Democratic Republic of the Congo | Africa | ERR572538  | 12971_4_25              |  | Weill et al. Science 2017 |
| <b>L1</b>          | 2009 | Democratic Republic of the Congo | Africa | ERR572514  | 12971_4_1               |  | Weill et al. Science 2017 |
| <b>L193</b>        | 2012 | Democratic Republic of the Congo | Africa | ERR386712  | 10868_2_93              |  | Weill et al. Science 2017 |
| <b>L204</b>        | 2012 | Democratic Republic of the Congo | Africa | ERR386711  | 10868_2_92              |  | Weill et al. Science 2017 |
| <b>726</b>         | 2009 | Democratic Republic of the Congo | Africa | ERR386698  | 10868_2_79              |  | Weill et al. Science 2017 |
| <b>L198</b>        | 2012 | Democratic Republic of the Congo | Africa | ERR386695  | 10868_2_76              |  | Weill et al. Science 2017 |
| <b>3</b>           | 2009 | Democratic Republic of the Congo | Africa | ERR386690  | 10868_2_71              |  | Weill et al. Science 2017 |
| <b>L174</b>        | 2012 | Democratic Republic of the Congo | Africa | ERR386688  | 10868_2_69              |  | Weill et al. Science 2017 |
| <b>2</b>           | 2009 | Democratic Republic of the Congo | Africa | ERR386683  | 10868_2_64              |  | Weill et al. Science 2017 |
| <b>217</b>         | 2009 | Democratic Republic of the Congo | Africa | ERR386672  | 10868_2_53              |  | Weill et al. Science 2017 |
| <b>L201</b>        | 2012 | Democratic Republic of the Congo | Africa | ERR386647  | 10868_2_28              |  | Weill et al. Science 2017 |
| <b>622</b>         | 2009 | Democratic Republic of the Congo | Africa | ERR386629  | 10868_2_10              |  | Weill et al. Science 2017 |
| <b>CNRVC930301</b> | 1993 | Djibouti                         | Africa | ERR1879572 | CNRVC930301_GATCAG_L001 |  | Weill et al. Science 2017 |
| <b>CNRVC070020</b> | 2007 | Djibouti                         | Africa | ERR1878551 | CNRVC070020             |  | Weill et al. Science 2017 |
| <b>CNRVC010048</b> | 2000 | Djibouti                         | Africa | ERR1877938 | CNRVC010048             |  | Weill et al. Science 2017 |
| <b>CNRVC010046</b> | 2000 | Djibouti                         | Africa | ERR1877649 | CNRVC010046_CTTGTA_L001 |  | Weill et al. Science 2017 |
| <b>F1393</b>       | 1993 | Djibouti                         | Africa | ERR1879652 | CDCF1393                |  | Weill et al. Science 2017 |
| <b>CNRVC010018</b> | 1994 | Djibouti                         | Africa | ERR976599  | 16244_8_53              |  | Weill et al. Science 2017 |
| <b>CNRVC010017</b> | 1994 | Djibouti                         | Africa | ERR976598  | 16244_8_52              |  | Weill et al. Science 2017 |

|                    |      |                   |        |            |                         |  |                           |
|--------------------|------|-------------------|--------|------------|-------------------------|--|---------------------------|
| <b>CNRVC010015</b> | 1994 | Djibouti          | Africa | ERR976597  | 16244_8_51              |  | Weill et al. Science 2017 |
| <b>CNRVC970177</b> | 1997 | Djibouti          | Africa | ERR976551  | 16244_8_5               |  | Weill et al. Science 2017 |
| <b>CNRVC970175</b> | 1997 | Djibouti          | Africa | ERR976549  | 16244_8_3               |  | Weill et al. Science 2017 |
| <b>CNRVC980158</b> | 1997 | Djibouti          | Africa | ERR976565  | 16244_8_19              |  | Weill et al. Science 2017 |
| <b>CNRVC980044</b> | 1985 | Djibouti          | Africa | ERR976482  | 16244_7_31              |  | Weill et al. Science 2017 |
| <b>CNRVC980039</b> | 1985 | Djibouti          | Africa | ERR976478  | 16244_7_27              |  | Weill et al. Science 2017 |
| <b>CNRVC930027</b> | 1966 | Egypt             | Africa | ERR976397  | 16244_6_40              |  | Weill et al. Science 2017 |
| <b>CNRVC050073</b> | 2005 | Equatorial Guinea | Africa | ERR1878131 | CNRVC050073             |  | Weill et al. Science 2017 |
| <b>CNRVC050060</b> | 2005 | Equatorial Guinea | Africa | ERR1878130 | CNRVC050060             |  | Weill et al. Science 2017 |
| <b>CNRVC150254</b> | 1998 | Ethiopia          | Africa | ERR1879545 | CNRVC150254             |  | Weill et al. Science 2017 |
| <b>CNRVC150218</b> | 1985 | Ethiopia          | Africa | ERR1879392 | CNRVC150218_GTTTCG_L001 |  | Weill et al. Science 2017 |
| <b>CNRVC150213</b> | 1998 | Ethiopia          | Africa | ERR1879387 | CNRVC150213_CCGTCC_L001 |  | Weill et al. Science 2017 |
| <b>CNRVC960596</b> | 1970 | Ethiopia          | Africa | ERR976463  | 16244_7_12              |  | Weill et al. Science 2017 |
| <b>CNRVC930038</b> | 1970 | Ethiopia          | Africa | ERR976399  | 16244_6_42              |  | Weill et al. Science 2017 |
| <b>CNRVC930079</b> | 1970 | France            | Europe | ERR1879569 | CNRVC930079_TCGAAG_L002 |  | Weill et al. Science 2017 |
| <b>CNRVC970170</b> | 1997 | Gabon             | Africa | ERR976547  | 16244_8_1               |  | Weill et al. Science 2017 |
| <b>262_14</b>      | 2014 | Ghana             | Africa | ERR1024526 | 16853_4_64              |  | Weill et al. Science 2017 |
| <b>468_14</b>      | 2014 | Ghana             | Africa | ERR1024524 | 16853_4_62              |  | Weill et al. Science 2017 |
| <b>19_14</b>       | 2014 | Ghana             | Africa | ERR1024521 | 16853_4_59              |  | Weill et al. Science 2017 |
| <b>712_11</b>      | 2011 | Ghana             | Africa | ERR1024518 | 16853_4_56              |  | Weill et al. Science 2017 |
| <b>CNRVC960627</b> | 1970 | Ghana             | Africa | ERR976465  | 16244_7_14              |  | Weill et al. Science 2017 |
| <b>CNRVC960623</b> | 1970 | Ghana             | Africa | ERR976464  | 16244_7_13              |  | Weill et al. Science 2017 |
| <b>CNRVC950224</b> | 1971 | Ghana             | Africa | ERR976430  | 16244_6_73              |  | Weill et al. Science 2017 |
| <b>CNRVC950223</b> | 1971 | Ghana             | Africa | ERR976429  | 16244_6_72              |  | Weill et al. Science 2017 |
| <b>CNRVC150217</b> | 1982 | Ghana/Nigeria     | Africa | ERR1879391 | CNRVC150217_GTGCC_L001  |  | Weill et al. Science 2017 |
| <b>CNRVC900108</b> | 1990 | Guinea            | Africa | ERR1879546 | CNRVC900108_ACAGTG_L001 |  | Weill et al. Science 2017 |
| <b>CNRVC040206</b> | 2004 | Guinea            | Africa | ERR1878112 | CNRVC040206             |  | Weill et al. Science 2017 |
| <b>CNRVC950724</b> | 1995 | Guinea            | Africa | ERR998677  | 16356_8_22              |  | Weill et al. Science 2017 |



|                    |           |               |               |            |             |  |                           |
|--------------------|-----------|---------------|---------------|------------|-------------|--|---------------------------|
| <b>CNRVC950723</b> | 1995      | Guinea        | Africa        | ERR998676  | 16356_8_21  |  | Weill et al. Science 2017 |
| <b>CNRVC950699</b> | 1995      | Guinea        | Africa        | ERR998670  | 16356_8_15  |  | Weill et al. Science 2017 |
| <b>CNRVC980367</b> | 1998      | Guinea        | Africa        | ERR976574  | 16244_8_28  |  | Weill et al. Science 2017 |
| <b>CNRVC940141</b> | 1994      | Guinea        | Africa        | ERR976542  | 16244_7_91  |  | Weill et al. Science 2017 |
| <b>CNRVC940128</b> | 1994      | Guinea        | Africa        | ERR976539  | 16244_7_88  |  | Weill et al. Science 2017 |
| <b>CNRVC940109</b> | 1994      | Guinea        | Africa        | ERR976538  | 16244_7_87  |  | Weill et al. Science 2017 |
| <b>CNRVC940103</b> | 1994      | Guinea        | Africa        | ERR976537  | 16244_7_86  |  | Weill et al. Science 2017 |
| <b>CNRVC960635</b> | 1970      | Guinea        | Africa        | ERR976467  | 16244_7_16  |  | Weill et al. Science 2017 |
| <b>CNRVC960629</b> | 1970      | Guinea        | Africa        | ERR976466  | 16244_7_15  |  | Weill et al. Science 2017 |
| <b>CNRVC930127</b> | 1970      | Guinea        | Africa        | ERR976403  | 16244_6_46  |  | Weill et al. Science 2017 |
| <b>L237</b>        | 2012      | Guinea        | Africa        | ERR386704  | 10868_2_85  |  | Weill et al. Science 2017 |
| <b>L211</b>        | 2012      | Guinea        | Africa        | ERR386666  | 10868_2_47  |  | Weill et al. Science 2017 |
| <b>L233</b>        | 2012      | Guinea        | Africa        | ERR386658  | 10868_2_39  |  | Weill et al. Science 2017 |
| <b>CNRVC120195</b> | 2012      | Guinea Bissau | Africa        | ERR1878605 | CNRVC120195 |  | Weill et al. Science 2017 |
| <b>CNRVC120194</b> | 2012      | Guinea Bissau | Africa        | ERR1878604 | CNRVC120194 |  | Weill et al. Science 2017 |
| <b>K6979</b>       | 2008      | Guinea Bissau | Africa        | ERR1880773 | CDCK6979    |  | Weill et al. Science 2017 |
| <b>K6975</b>       | 2008      | Guinea Bissau | Africa        | ERR1880772 | CDCK6975    |  | Weill et al. Science 2017 |
| <b>F5144</b>       | 1997      | Guinea Bissau | Africa        | ERR1880762 | CDCF5144    |  | Weill et al. Science 2017 |
| <b>CNRVC140133</b> | 1994-1995 | Guinea Bissau | Africa        | ERR976504  | 16244_7_53  |  | Weill et al. Science 2017 |
| <b>CNRVC100278</b> | 2010      | Haiti         | North America | ERR1878592 | CNRVC100278 |  | Weill et al. Science 2017 |
| <b>THSTI_VC63</b>  | 1992      | India         | Asia          | ERR1880844 | THSTI_VC63  |  | Weill et al. Science 2017 |
| <b>THSTI_VC4</b>   | 1992      | India         | Asia          | ERR1880843 | THSTI_VC4   |  | Weill et al. Science 2017 |
| <b>THSTI_V8</b>    | 1989      | India         | Asia          | ERR1880842 | THSTI_V8    |  | Weill et al. Science 2017 |
| <b>THSTI_V157</b>  | 1991      | India         | Asia          | ERR1880841 | THSTI_V157  |  | Weill et al. Science 2017 |
| <b>THSTI_V156</b>  | 1991      | India         | Asia          | ERR1880840 | THSTI_V156  |  | Weill et al. Science 2017 |
| <b>THSTI_V149</b>  | 1990      | India         | Asia          | ERR1880839 | THSTI_V149  |  | Weill et al. Science 2017 |
| <b>THSTI_V12</b>   | 1989      | India         | Asia          | ERR1880838 | THSTI_V12   |  | Weill et al. Science 2017 |
| <b>THSTI_V108</b>  | 1990      | India         | Asia          | ERR1880837 | THSTI_V108  |  | Weill et al. Science 2017 |

|                |      |       |      |            |                |                           |
|----------------|------|-------|------|------------|----------------|---------------------------|
| THSTI_RC12     | 2001 | India | Asia | ERR1880836 | THSTI_RC12     | Weill et al. Science 2017 |
| THSTI_NLC8     | 1999 | India | Asia | ERR1880835 | THSTI_NLC8     | Weill et al. Science 2017 |
| THSTI_L9496    | 2006 | India | Asia | ERR1880834 | THSTI_L9496    | Weill et al. Science 2017 |
| THSTI_L19089   | 2006 | India | Asia | ERR1880833 | THSTI_L19089   | Weill et al. Science 2017 |
| THSTI_K9398    | 2005 | India | Asia | ERR1880832 | THSTI_K9398    | Weill et al. Science 2017 |
| THSTI_K12759   | 2005 | India | Asia | ERR1880831 | THSTI_K12759   | Weill et al. Science 2017 |
| THSTI_J4770    | 2004 | India | Asia | ERR1880830 | THSTI_J4770    | Weill et al. Science 2017 |
| THSTI_J16173   | 2004 | India | Asia | ERR1880829 | THSTI_J16173   | Weill et al. Science 2017 |
| THSTI_IDH02959 | 2010 | India | Asia | ERR1880828 | THSTI_IDH02959 | Weill et al. Science 2017 |
| THSTI_IDH02834 | 2010 | India | Asia | ERR1880827 | THSTI_IDH02834 | Weill et al. Science 2017 |
| THSTI_IDH02367 | 2009 | India | Asia | ERR1880826 | THSTI_IDH02367 | Weill et al. Science 2017 |
| THSTI_IDH01405 | 2009 | India | Asia | ERR1880825 | THSTI_IDH01405 | Weill et al. Science 2017 |
| THSTI_IDH01272 | 2008 | India | Asia | ERR1880824 | THSTI_IDH01272 | Weill et al. Science 2017 |
| THSTI_IDH00563 | 2008 | India | Asia | ERR1880823 | THSTI_IDH00563 | Weill et al. Science 2017 |
| THSTI_IDH00136 | 2007 | India | Asia | ERR1880822 | THSTI_IDH00136 | Weill et al. Science 2017 |
| THSTI_IDH0002  | 2007 | India | Asia | ERR1880821 | THSTI_IDH0002  | Weill et al. Science 2017 |
| THSTI_I17260   | 2003 | India | Asia | ERR1880820 | THSTI_I17260   | Weill et al. Science 2017 |
| THSTI_I16615   | 2003 | India | Asia | ERR1880819 | THSTI_I16615   | Weill et al. Science 2017 |
| THSTI_H12381   | 2002 | India | Asia | ERR1880818 | THSTI_H12381   | Weill et al. Science 2017 |
| THSTI_H11801   | 2002 | India | Asia | ERR1880817 | THSTI_H11801   | Weill et al. Science 2017 |
| THSTI_GP160bis | 1980 | India | Asia | ERR1880816 | THSTI_GP160bis | Weill et al. Science 2017 |
| THSTI_G27875   | 2001 | India | Asia | ERR1880814 | THSTI_G27875   | Weill et al. Science 2017 |
| THSTI_E12067   | 1999 | India | Asia | ERR1880813 | THSTI_E12067   | Weill et al. Science 2017 |
| THSTI_D31153   | 1998 | India | Asia | ERR1880812 | THSTI_D31153   | Weill et al. Science 2017 |
| THSTI_D16133   | 1998 | India | Asia | ERR1880811 | THSTI_D16133   | Weill et al. Science 2017 |
| THSTI_CRC198   | 2000 | India | Asia | ERR1880810 | THSTI_CRC198   | Weill et al. Science 2017 |

|              |      |             |      |            |                         |                           |
|--------------|------|-------------|------|------------|-------------------------|---------------------------|
| THSTI_CRC155 | 2000 | India       | Asia | ERR1880809 | THSTI_CRC155            | Weill et al. Science 2017 |
| THSTI_CO908  | 1995 | India       | Asia | ERR1880808 | THSTI_CO908             | Weill et al. Science 2017 |
| THSTI_CO783  | 1994 | India       | Asia | ERR1880807 | THSTI_CO783             | Weill et al. Science 2017 |
| THSTI_CO553  | 1994 | India       | Asia | ERR1880806 | THSTI_CO553             | Weill et al. Science 2017 |
| THSTI_CO368  | 1993 | India       | Asia | ERR1880805 | THSTI_CO368             | Weill et al. Science 2017 |
| THSTI_CO327  | 1993 | India       | Asia | ERR1880804 | THSTI_CO327             | Weill et al. Science 2017 |
| THSTI_CO1089 | 1995 | India       | Asia | ERR1880803 | THSTI_CO1089            | Weill et al. Science 2017 |
| THSTI_C18932 | 1997 | India       | Asia | ERR1880802 | THSTI_C18932            | Weill et al. Science 2017 |
| THSTI_AM305  | 1997 | India       | Asia | ERR1880801 | THSTI_AM305             | Weill et al. Science 2017 |
| THSTI_AM232  | 1996 | India       | Asia | ERR1880800 | THSTI_AM232             | Weill et al. Science 2017 |
| THSTI_AM120  | 1996 | India       | Asia | ERR1880799 | THSTI_AM120             | Weill et al. Science 2017 |
| CNRVC970077  | 1997 | India       | Asia | ERR1879637 | CNRVC970077_CCAACA_L002 | Weill et al. Science 2017 |
| CNRVC960215  | 1996 | India       | Asia | ERR1879597 | CNRVC960215_ATGAGC_L002 | Weill et al. Science 2017 |
| CNRVC930066  | 1964 | India       | Asia | ERR1879566 | CNRVC930066_ACAGTG_L002 | Weill et al. Science 2017 |
| CNRVC930036  | 1962 | India       | Asia | ERR1879562 | CNRVC930036_TCGGCA_L001 | Weill et al. Science 2017 |
| CNRVC930003  | 1992 | India       | Asia | ERR1879553 | CNRVC930003_TCATTC_L001 | Weill et al. Science 2017 |
| CNRVC080397  | 2008 | India       | Asia | ERR1878570 | CNRVC080397             | Weill et al. Science 2017 |
| CNRVC060089  | 2006 | India       | Asia | ERR1878151 | CNRVC060089             | Weill et al. Science 2017 |
| CNRVC060333  | 2006 | India/Nepal | Asia | ERR1878548 | CNRVC060333             | Weill et al. Science 2017 |
| CNRVC010100  | 2001 | Indonesia   | Asia | ERR1877943 | CNRVC010100             | Weill et al. Science 2017 |
| CNRVC960842  | 1965 | Iran        | Asia | ERR1879605 | CNRVC960842_AGTCAA_L001 | Weill et al. Science 2017 |
| CNRVC960800  | 1965 | Iran        | Asia | ERR1879604 | CNRVC960800_GGCTAC_L001 | Weill et al. Science 2017 |
| CNRVC960799  | 1965 | Iran        | Asia | ERR1879603 | CNRVC960799_GTGAAA_L001 | Weill et al. Science 2017 |
| CNRVC930076  | 1965 | Iran        | Asia | ERR1879568 | CNRVC930076_CAGATC_L002 | Weill et al. Science 2017 |
| CNRVC960872  | 1965 | Iran        | Asia | ERR1879607 | 960872_S21              | Weill et al. Science 2017 |
| CNRVC960871  | 1965 | Iran        | Asia | ERR1879606 | 960871_S20              | Weill et al. Science 2017 |
| CNRVC960768  | 1966 | Iraq        | Asia | ERR1879601 | CNRVC960768_TAGCTT_L001 | Weill et al. Science 2017 |
| CNRVC950800  | 1995 | Iraq        | Asia | ERR1879594 | CNRVC950800_CTATAC_L001 | Weill et al. Science 2017 |

|                    |      |           |        |            |                            |                           |
|--------------------|------|-----------|--------|------------|----------------------------|---------------------------|
| <b>CNRVC950798</b> | 1995 | Iraq      | Asia   | ERR1879593 | CNRVC950798_CTAGCT_L001    | Weill et al. Science 2017 |
| <b>CNRVC950792</b> | 1995 | Iraq      | Asia   | ERR1879588 | CNRVC950792_GAGTGG_L002    | Weill et al. Science 2017 |
| <b>CNRVC030438</b> | 2003 | Iraq      | Asia   | ERR1878096 | CNRVC030438_CGGAAT_L001    | Weill et al. Science 2017 |
| <b>CNRVC960778</b> | 1966 | Iraq      | Asia   | ERR1879602 | 960778_S19                 | Weill et al. Science 2017 |
| <b>CNRVC960911</b> | 1970 | Israel    | Asia   | ERR1879626 | CNRVC960911_AGTTCCTCC_L001 | Weill et al. Science 2017 |
| <b>CNRVC960899</b> | 1970 | Israel    | Asia   | ERR1879625 | CNRVC960899_CAACTA_L002    | Weill et al. Science 2017 |
| <b>CNRVC960891</b> | 1970 | Israel    | Asia   | ERR1879624 | 960891_S16                 | Weill et al. Science 2017 |
| <b>CNRVC930033</b> | 1970 | Israel    | Asia   | ERR1879561 | 930033_S15                 | Weill et al. Science 2017 |
| <b>12_1970</b>     | 1970 | Israel    | Asia   | ERR042749  | 6353_7_21                  | Weill et al. Science 2017 |
| <b>4_1970</b>      | 1970 | Israel    | Asia   | ERR042748  | 6353_7_20                  | Weill et al. Science 2017 |
| <b>1_1970</b>      | 1970 | Israel    | Asia   | ERR042745  | 6353_7_17                  | Weill et al. Science 2017 |
| <b>CNRVC950250</b> | 1974 | Italy     | Europe | ERR1879585 | CNRVC950250_GTTTCG_L002    | Weill et al. Science 2017 |
| <b>CNRVC150244</b> | 1973 | Italy     | Europe | ERR1879541 | CNRVC150244_CTCAGA_L001    | Weill et al. Science 2017 |
| <b>CNRVC150230</b> | 1994 | Italy     | Europe | ERR1879438 | CNRVC150230_CAGGCG_L001    | Weill et al. Science 2017 |
| <b>CNRVC960918</b> | 1970 | Jordan    | Asia   | ERR1879627 | 960918_S18                 | Weill et al. Science 2017 |
| <b>CNRVC150252</b> | 1998 | Kenya     | Africa | ERR1879544 | CNRVC150252                | Weill et al. Science 2017 |
| <b>CNRVC150251</b> | 1998 | Kenya     | Africa | ERR1879543 | CNRVC150251                | Weill et al. Science 2017 |
| <b>CNRVC150243</b> | 1998 | Kenya     | Africa | ERR1879540 | CNRVC150243_CTATAC_L001    | Weill et al. Science 2017 |
| <b>CNRVC150240</b> | 1998 | Kenya     | Africa | ERR1879539 | CNRVC150240_CTAGCT_L001    | Weill et al. Science 2017 |
| <b>CNRVC150211</b> | 1998 | Kenya     | Africa | ERR1879385 | CNRVC150211_AGTTCCTCC_L001 | Weill et al. Science 2017 |
| <b>CNRVC060120</b> | 2006 | Kenya     | Africa | ERR1878154 | CNRVC060120                | Weill et al. Science 2017 |
| <b>CNRVC060119</b> | 2006 | Kenya     | Africa | ERR1878153 | CNRVC060119                | Weill et al. Science 2017 |
| <b>CNRVC910416</b> | 1991 | Kurdistan | Asia   | ERR1879550 | CNRVC910416_TAATCG_L001    | Weill et al. Science 2017 |
| <b>CNRVC990209</b> | 1999 | Laos      | Asia   | ERR1879645 | CNRVC990209_CTAGCT_L002    | Weill et al. Science 2017 |
| <b>CNRVC960922</b> | 1970 | Lebanon   | Asia   | ERR1879628 | CNRVC960922_CACCGG_L002    | Weill et al. Science 2017 |
| <b>CNRVC150223</b> | 1993 | Lebanon   | Asia   | ERR1879432 | CNRVC150223_ATGAGC_L001    | Weill et al. Science 2017 |
| <b>CNRVC150215</b> | 1993 | Lebanon   | Asia   | ERR1879389 | CNRVC150215_GTCCGC_L001    | Weill et al. Science 2017 |
| <b>CNRVC930044</b> | 1970 | Lebanon   | Asia   | ERR1879563 | 930044_S17                 | Weill et al. Science 2017 |

|                    |      |            |        |            |                         |  |                           |
|--------------------|------|------------|--------|------------|-------------------------|--|---------------------------|
| <b>CNRVC030477</b> | 2003 | Liberia    | Africa | ERR1878099 | CNRVC030477             |  | Weill et al. Science 2017 |
| <b>CNRVC030475</b> | 2003 | Liberia    | Africa | ERR1878098 | CNRVC030475             |  | Weill et al. Science 2017 |
| <b>CNRVC020393</b> | 2002 | Liberia    | Africa | ERR1878088 | CNRVC020393             |  | Weill et al. Science 2017 |
| <b>CNRVC020062</b> | 2002 | Liberia    | Africa | ERR1877954 | CNRVC020062             |  | Weill et al. Science 2017 |
| <b>CNRVC960223</b> | 1996 | Liberia    | Africa | ERR998699  | 16356_8_44              |  | Weill et al. Science 2017 |
| <b>CNRVC940165</b> | 1994 | Liberia    | Africa | ERR998658  | 16356_8_3               |  | Weill et al. Science 2017 |
| <b>CNRVC950730</b> | 1995 | Liberia    | Africa | ERR998679  | 16356_8_24              |  | Weill et al. Science 2017 |
| <b>CNRVC950728</b> | 1995 | Liberia    | Africa | ERR998678  | 16356_8_23              |  | Weill et al. Science 2017 |
| <b>CNRVC940164</b> | 1994 | Liberia    | Africa | ERR998657  | 16356_8_2               |  | Weill et al. Science 2017 |
| <b>CNRVC940162</b> | 1994 | Liberia    | Africa | ERR976546  | 16244_7_95              |  | Weill et al. Science 2017 |
| <b>CNRVC940147</b> | 1994 | Liberia    | Africa | ERR976545  | 16244_7_94              |  | Weill et al. Science 2017 |
| <b>CNRVC940142</b> | 1994 | Liberia    | Africa | ERR976543  | 16244_7_92              |  | Weill et al. Science 2017 |
| <b>CNRVC960946</b> | 1970 | Liberia    | Africa | ERR976469  | 16244_7_18              |  | Weill et al. Science 2017 |
| <b>CNRVC960928</b> | 1970 | Liberia    | Africa | ERR976468  | 16244_7_17              |  | Weill et al. Science 2017 |
| <b>CNRVC960951</b> | 1970 | Libya      | Africa | ERR976471  | 16244_7_20              |  | Weill et al. Science 2017 |
| <b>CNRVC960949</b> | 1970 | Libya      | Africa | ERR976470  | 16244_7_19              |  | Weill et al. Science 2017 |
| <b>CNRVC010055</b> | 2001 | Madagascar | Africa | ERR1877940 | CNRVC010055_TTAGGC_L001 |  | Weill et al. Science 2017 |
| <b>CNRVC010051</b> | 2000 | Madagascar | Africa | ERR1877939 | CNRVC010051_ATCACG_L001 |  | Weill et al. Science 2017 |
| <b>CNRVC000065</b> | 2000 | Madagascar | Africa | ERR976596  | 16244_8_50              |  | Weill et al. Science 2017 |
| <b>CNRVC000064</b> | 2000 | Madagascar | Africa | ERR976595  | 16244_8_49              |  | Weill et al. Science 2017 |
| <b>CNRVC000062</b> | 2000 | Madagascar | Africa | ERR976594  | 16244_8_48              |  | Weill et al. Science 2017 |
| <b>CNRVC000060</b> | 2000 | Madagascar | Africa | ERR976593  | 16244_8_47              |  | Weill et al. Science 2017 |
| <b>CNRVC000059</b> | 2000 | Madagascar | Africa | ERR976592  | 16244_8_46              |  | Weill et al. Science 2017 |
| <b>CNRVC000058</b> | 2000 | Madagascar | Africa | ERR976591  | 16244_8_45              |  | Weill et al. Science 2017 |
| <b>CNRVC000056</b> | 1999 | Madagascar | Africa | ERR976590  | 16244_8_44              |  | Weill et al. Science 2017 |
| <b>CNRVC000055</b> | 1999 | Madagascar | Africa | ERR976589  | 16244_8_43              |  | Weill et al. Science 2017 |
| <b>CNRVC990078</b> | 1999 | Madagascar | Africa | ERR976588  | 16244_8_42              |  | Weill et al. Science 2017 |
| <b>F5097</b>       | 1997 | Malawi     | Africa | ERR1880761 | CDCF5097                |  | Weill et al. Science 2017 |

|                    |      |            |        |            |                         |  |                           |
|--------------------|------|------------|--------|------------|-------------------------|--|---------------------------|
| <b>F5096</b>       | 1997 | Malawi     | Africa | ERR1879658 | CDCF5096                |  | Weill et al. Science 2017 |
| <b>CNRVC920049</b> | 1992 | Malawi     | Africa | ERR976523  | 16244_7_72              |  | Weill et al. Science 2017 |
| <b>CNRVC920170</b> | 1989 | Malawi     | Africa | ERR976394  | 16244_6_37              |  | Weill et al. Science 2017 |
| <b>CNRVC900123</b> | 1990 | Malawi     | Africa | ERR976393  | 16244_6_36              |  | Weill et al. Science 2017 |
| <b>CNRVC900117</b> | 1990 | Malawi     | Africa | ERR976392  | 16244_6_35              |  | Weill et al. Science 2017 |
| <b>CNRVC950100</b> | 1973 | Malaysia   | Asia   | ERR1879580 | CNRVC950100_CCGTCC_L002 |  | Weill et al. Science 2017 |
| <b>CNRVC060010</b> | 2005 | Mali       | Africa | ERR1878150 | CNRVC060010             |  | Weill et al. Science 2017 |
| <b>CNRVC060009</b> | 2006 | Mali       | Africa | ERR1878149 | CNRVC060009             |  | Weill et al. Science 2017 |
| <b>K0108</b>       | 2003 | Mali       | Africa | ERR1880771 | CDCK0108                |  | Weill et al. Science 2017 |
| <b>K0107</b>       | 2003 | Mali       | Africa | ERR1880770 | CDCK0107                |  | Weill et al. Science 2017 |
| <b>CNRVC960250</b> | 1996 | Mali       | Africa | ERR998704  | 16356_8_49              |  | Weill et al. Science 2017 |
| <b>CNRVC950708</b> | 1995 | Mali       | Africa | ERR998674  | 16356_8_19              |  | Weill et al. Science 2017 |
| <b>CNRVC950707</b> | 1995 | Mali       | Africa | ERR998673  | 16356_8_18              |  | Weill et al. Science 2017 |
| <b>CNRVC980043</b> | 1985 | Mali       | Africa | ERR976481  | 16244_7_30              |  | Weill et al. Science 2017 |
| <b>CNRVC980041</b> | 1984 | Mali       | Africa | ERR976480  | 16244_7_29              |  | Weill et al. Science 2017 |
| <b>CNRVC960952</b> | 1970 | Mali       | Africa | ERR976472  | 16244_7_21              |  | Weill et al. Science 2017 |
| <b>CNRVC930075</b> | 1970 | Mali       | Africa | ERR976402  | 16244_6_45              |  | Weill et al. Science 2017 |
| <b>CNRVC070144</b> | 2005 | Mauritania | Africa | ERR1878559 | CNRVC070144             |  | Weill et al. Science 2017 |
| <b>CNRVC070142</b> | 2006 | Mauritania | Africa | ERR1878558 | CNRVC070142             |  | Weill et al. Science 2017 |
| <b>CNRVC070136</b> | 2006 | Mauritania | Africa | ERR1878557 | CNRVC070136             |  | Weill et al. Science 2017 |
| <b>CNRVC070124</b> | 2005 | Mauritania | Africa | ERR1878556 | CNRVC070124             |  | Weill et al. Science 2017 |
| <b>CNRVC960263</b> | 1996 | Mauritania | Africa | ERR1879599 | 960263_S14              |  | Weill et al. Science 2017 |
| <b>CNRVC960260</b> | 1996 | Mauritania | Africa | ERR1879598 | 960260_S13              |  | Weill et al. Science 2017 |
| <b>CNRVC940180</b> | 1994 | Morocco    | Africa | ERR998661  | 16356_8_6               |  | Weill et al. Science 2017 |
| <b>CNRVC940179</b> | 1994 | Morocco    | Africa | ERR998660  | 16356_8_5               |  | Weill et al. Science 2017 |
| <b>CNRVC940137</b> | 1994 | Morocco    | Africa | ERR976541  | 16244_7_90              |  | Weill et al. Science 2017 |
| <b>CNRVC930255</b> | 1993 | Morocco    | Africa | ERR976527  | 16244_7_76              |  | Weill et al. Science 2017 |
| <b>CNRVC910386</b> | 1991 | Morocco    | Africa | ERR976520  | 16244_7_69              |  | Weill et al. Science 2017 |

|                    |      |            |         |            |                         |  |                           |
|--------------------|------|------------|---------|------------|-------------------------|--|---------------------------|
| <b>CNRVC910349</b> | 1991 | Morocco    | Africa  | ERR976518  | 16244_7_67              |  | Weill et al. Science 2017 |
| <b>CNRVC910347</b> | 1991 | Morocco    | Africa  | ERR976517  | 16244_7_66              |  | Weill et al. Science 2017 |
| <b>CNRVC950498</b> | 1972 | Morocco    | Africa  | ERR976450  | 16244_6_93              |  | Weill et al. Science 2017 |
| <b>CNRVC950487</b> | 1972 | Morocco    | Africa  | ERR976449  | 16244_6_92              |  | Weill et al. Science 2017 |
| <b>CNRVC950476</b> | 1972 | Morocco    | Africa  | ERR976448  | 16244_6_91              |  | Weill et al. Science 2017 |
| <b>CNRVC950468</b> | 1972 | Morocco    | Africa  | ERR976447  | 16244_6_90              |  | Weill et al. Science 2017 |
| <b>CNRVC950466</b> | 1972 | Morocco    | Africa  | ERR976446  | 16244_6_89              |  | Weill et al. Science 2017 |
| <b>CNRVC950431</b> | 1974 | Morocco    | Africa  | ERR976445  | 16244_6_88              |  | Weill et al. Science 2017 |
| <b>CNRVC900125</b> | 1990 | Mozambique | Africa  | ERR1879547 | CNRVC900125_GCCAAT_L001 |  | Weill et al. Science 2017 |
| <b>F5149</b>       | 1997 | Mozambique | Africa  | ERR1880763 | CDCF5149                |  | Weill et al. Science 2017 |
| <b>C8178</b>       | 1992 | Mozambique | Africa  | ERR1877616 | CDCC8178_rep            |  | Weill et al. Science 2017 |
| <b>B_64</b>        | 2004 | Mozambique | Africa  | ERR044797  | 6437_7_20               |  | Weill et al. Science 2017 |
| <b>CNRVC990039</b> | 1999 | Mozambique | Africa  | ERR976587  | 16244_8_41              |  | Weill et al. Science 2017 |
| <b>CNRVC990038</b> | 1999 | Mozambique | Africa  | ERR976586  | 16244_8_40              |  | Weill et al. Science 2017 |
| <b>CNRVC990019</b> | 1999 | Mozambique | Africa  | ERR976585  | 16244_8_39              |  | Weill et al. Science 2017 |
| <b>CNRVC950641</b> | 1972 | Myanmar    | Asia    | ERR1879587 | CNRVC950641_GTCCGC_L001 |  | Weill et al. Science 2017 |
| <b>CNRVC930029</b> | 1971 | Myanmar    | Asia    | ERR1879559 | CNRVC930029_TCGAAG_L001 |  | Weill et al. Science 2017 |
| <b>CNRVC940135</b> | 1994 | Nepal      | Asia    | ERR1879576 | CNRVC940135_GGCTAC_L002 |  | Weill et al. Science 2017 |
| <b>CNRVC960976</b> | 1962 | New Guinea | Oceania | ERR1879629 | CNRVC960976_CACGAT_L002 |  | Weill et al. Science 2017 |
| <b>CNRVC140167</b> | 2010 | Niger      | Africa  | ERR1878612 | CNRVC140167             |  | Weill et al. Science 2017 |
| <b>CNRVC140160</b> | 2010 | Niger      | Africa  | ERR1878611 | CNRVC140160             |  | Weill et al. Science 2017 |
| <b>CNRVC080124</b> | 2008 | Niger      | Africa  | ERR1878566 | CNRVC080124             |  | Weill et al. Science 2017 |
| <b>CNRVC080122</b> | 2008 | Niger      | Africa  | ERR1878565 | CNRVC080122             |  | Weill et al. Science 2017 |
| <b>CNRVC060273</b> | 2006 | Niger      | Africa  | ERR1878545 | CNRVC060273             |  | Weill et al. Science 2017 |
| <b>CNRVC060272</b> | 2006 | Niger      | Africa  | ERR1878544 | CNRVC060272             |  | Weill et al. Science 2017 |
| <b>CNRVC040210</b> | 2004 | Niger      | Africa  | ERR1878114 | CNRVC040210             |  | Weill et al. Science 2017 |
| <b>CNRVC040209</b> | 2004 | Niger      | Africa  | ERR1878113 | CNRVC040209             |  | Weill et al. Science 2017 |
| <b>CNRVC000005</b> | 1999 | Niger      | Africa  | ERR1877637 | CNRVC000005_CGATGT_L001 |  | Weill et al. Science 2017 |

|                    |      |         |        |            |             |  |                           |
|--------------------|------|---------|--------|------------|-------------|--|---------------------------|
| <b>CNRVC940190</b> | 1994 | Niger   | Africa | ERR998663  | 16356_8_8   |  | Weill et al. Science 2017 |
| <b>CNRVC960003</b> | 1996 | Niger   | Africa | ERR998689  | 16356_8_34  |  | Weill et al. Science 2017 |
| <b>CNRVC950759</b> | 1995 | Niger   | Africa | ERR998686  | 16356_8_31  |  | Weill et al. Science 2017 |
| <b>CNRVC910279</b> | 1991 | Niger   | Africa | ERR976516  | 16244_7_65  |  | Weill et al. Science 2017 |
| <b>CNRVC960971</b> | 1970 | Niger   | Africa | ERR976474  | 16244_7_23  |  | Weill et al. Science 2017 |
| <b>CNRVC960959</b> | 1970 | Niger   | Africa | ERR976473  | 16244_7_22  |  | Weill et al. Science 2017 |
| <b>CNRVC140150</b> | 2014 | Nigeria | Africa | ERR1878610 | CNRVC140150 |  | Weill et al. Science 2017 |
| <b>CNRVC140027</b> | 2014 | Nigeria | Africa | ERR1878609 | CNRVC140027 |  | Weill et al. Science 2017 |
| <b>CNRVC110262</b> | 2011 | Nigeria | Africa | ERR1878601 | CNRVC110262 |  | Weill et al. Science 2017 |
| <b>CNRVC110060</b> | 2011 | Nigeria | Africa | ERR1878594 | CNRVC110060 |  | Weill et al. Science 2017 |
| <b>CNRVC110058</b> | 2011 | Nigeria | Africa | ERR1878593 | CNRVC110058 |  | Weill et al. Science 2017 |
| <b>CNRVC100224</b> | 2010 | Nigeria | Africa | ERR1878589 | CNRVC100224 |  | Weill et al. Science 2017 |
| <b>CNRVC100159</b> | 2010 | Nigeria | Africa | ERR1878583 | CNRVC100159 |  | Weill et al. Science 2017 |
| <b>CNRVC090177</b> | 2009 | Nigeria | Africa | ERR1878579 | CNRVC090177 |  | Weill et al. Science 2017 |
| <b>CNRVC090175</b> | 2009 | Nigeria | Africa | ERR1878578 | CNRVC090175 |  | Weill et al. Science 2017 |
| <b>CNRVC060280</b> | 2006 | Nigeria | Africa | ERR1878547 | CNRVC060280 |  | Weill et al. Science 2017 |
| <b>CNRVC060279</b> | 2006 | Nigeria | Africa | ERR1878546 | CNRVC060279 |  | Weill et al. Science 2017 |
| <b>CNRVC050334</b> | 2005 | Nigeria | Africa | ERR1878147 | CNRVC050334 |  | Weill et al. Science 2017 |
| <b>CNRVC050323</b> | 2005 | Nigeria | Africa | ERR1878146 | CNRVC050323 |  | Weill et al. Science 2017 |
| <b>F4170</b>       | 1997 | Nigeria | Africa | ERR1879657 | CDCF4170    |  | Weill et al. Science 2017 |
| <b>F4169</b>       | 1997 | Nigeria | Africa | ERR1879656 | CDCF4169    |  | Weill et al. Science 2017 |
| <b>CNRVC960271</b> | 1996 | Nigeria | Africa | ERR998709  | 16356_8_54  |  | Weill et al. Science 2017 |
| <b>CNRVC960258</b> | 1996 | Nigeria | Africa | ERR998707  | 16356_8_52  |  | Weill et al. Science 2017 |
| <b>CNRVC960254</b> | 1996 | Nigeria | Africa | ERR998706  | 16356_8_51  |  | Weill et al. Science 2017 |
| <b>CNRVC960252</b> | 1996 | Nigeria | Africa | ERR998705  | 16356_8_50  |  | Weill et al. Science 2017 |
| <b>CNRVC960028</b> | 1996 | Nigeria | Africa | ERR998692  | 16356_8_37  |  | Weill et al. Science 2017 |
| <b>CNRVC950238</b> | 1970 | Nigeria | Africa | ERR976432  | 16244_6_75  |  | Weill et al. Science 2017 |
| <b>CNRVC950235</b> | 1970 | Nigeria | Africa | ERR976431  | 16244_6_74  |  | Weill et al. Science 2017 |



|                    |      |                          |        |            |                         |                           |
|--------------------|------|--------------------------|--------|------------|-------------------------|---------------------------|
| <b>CNRVC961005</b> | 1964 | Pakistan                 | Asia   | ERR1879630 | CNRVC961005_CACTCA_L002 | Weill et al. Science 2017 |
| <b>CNRVC150220</b> | 1992 | Pakistan                 | Asia   | ERR1879429 | CNRVC150220_GAGTGG_L001 | Weill et al. Science 2017 |
| <b>CNRVC090144</b> | 2009 | Pakistan                 | Asia   | ERR1878577 | CNRVC090144             | Weill et al. Science 2017 |
| <b>CNRVC090143</b> | 2009 | Pakistan                 | Asia   | ERR1878576 | CNRVC090143             | Weill et al. Science 2017 |
| <b>CNRVC090123</b> | 2009 | Pakistan                 | Asia   | ERR1878575 | CNRVC090123             | Weill et al. Science 2017 |
| <b>CNRVC050280</b> | 2005 | Pakistan                 | Asia   | ERR1878135 | CNRVC050280             | Weill et al. Science 2017 |
| <b>Gaz11</b>       | 1994 | Palestine                | Asia   | ERR042733  | 6353_7_5                | Weill et al. Science 2017 |
| <b>Gaz21</b>       | 1994 | Palestine                | Asia   | ERR042738  | 6353_7_10               | Weill et al. Science 2017 |
| <b>Gaz2</b>        | 1994 | Palestine                | Asia   | ERR042729  | 6353_7_1                | Weill et al. Science 2017 |
| <b>CNRVC950218</b> | 1973 | Philippines              | Asia   | ERR1879584 | CNRVC950218_GTGGCC_L002 | Weill et al. Science 2017 |
| <b>CNRVC940044</b> | 1963 | Philippines              | Asia   | ERR1879573 | CNRVC940044_ACTTGA_L002 | Weill et al. Science 2017 |
| <b>CNRVC930060</b> | 1961 | Philippines              | Asia   | ERR1879564 | CNRVC930060_CGATGT_L002 | Weill et al. Science 2017 |
| <b>CNRVC140139</b> | 1974 | Portugal                 | Europe | ERR976510  | 16244_7_59              | Weill et al. Science 2017 |
| <b>CNRVC140137</b> | 1974 | Portugal                 | Europe | ERR976508  | 16244_7_57              | Weill et al. Science 2017 |
| <b>CNRVC140136</b> | 1971 | Portugal                 | Europe | ERR976507  | 16244_7_56              | Weill et al. Science 2017 |
| <b>CNRVC140135</b> | 1971 | Portugal                 | Europe | ERR976506  | 16244_7_55              | Weill et al. Science 2017 |
| <b>CNRVC140134</b> | 1971 | Portugal                 | Europe | ERR976505  | 16244_7_54              | Weill et al. Science 2017 |
| <b>NICD_69175</b>  | 1980 | Republic of South Africa | Africa | ERR1880792 | NICD_69175              | Weill et al. Science 2017 |
| <b>NICD_69173</b>  | 1980 | Republic of South Africa | Africa | ERR1880791 | NICD_69173              | Weill et al. Science 2017 |
| <b>NICD_69147</b>  | 1980 | Republic of South Africa | Africa | ERR1880786 | NICD_69147              | Weill et al. Science 2017 |
| <b>NICD_4076</b>   | 2001 | Republic of South Africa | Africa | ERR1880790 | NICD_4076               | Weill et al. Science 2017 |
| <b>NICD_273</b>    | 1998 | Republic of South Africa | Africa | ERR1880789 | NICD_273                | Weill et al. Science 2017 |
| <b>NICD_16879</b>  | 2001 | Republic of South Africa | Africa | ERR1880788 | NICD_16879              | Weill et al. Science 2017 |
| <b>NICD_16756</b>  | 2001 | Republic of South Africa | Africa | ERR1880787 | NICD_16756              | Weill et al. Science 2017 |
| <b>NICD_16744</b>  | 2001 | Republic of South Africa | Africa | ERR1877613 | NICD_16744              | Weill et al. Science 2017 |
| <b>NICD_16230</b>  | 2001 | Republic of South Africa | Africa | ERR1880785 | NICD_16230              | Weill et al. Science 2017 |

|                    |      |                          |        |            |                          |  |                           |
|--------------------|------|--------------------------|--------|------------|--------------------------|--|---------------------------|
| <b>NICD_16211</b>  | 2001 | Republic of South Africa | Africa | ERR1880784 | NICD_16211               |  | Weill et al. Science 2017 |
| <b>NICD_15959</b>  | 2001 | Republic of South Africa | Africa | ERR1880783 | NICD_15959               |  | Weill et al. Science 2017 |
| <b>NICD_15907</b>  | 2001 | Republic of South Africa | Africa | ERR1880782 | NICD_15907               |  | Weill et al. Science 2017 |
| <b>NICD_15104</b>  | 2001 | Republic of South Africa | Africa | ERR1880781 | NICD_15104               |  | Weill et al. Science 2017 |
| <b>NICD_15070</b>  | 2001 | Republic of South Africa | Africa | ERR1880780 | NICD_15070               |  | Weill et al. Science 2017 |
| <b>NICD_14794</b>  | 2001 | Republic of South Africa | Africa | ERR1880779 | NICD_14794               |  | Weill et al. Science 2017 |
| <b>NICD_14191</b>  | 2001 | Republic of South Africa | Africa | ERR1880778 | NICD_14191               |  | Weill et al. Science 2017 |
| <b>NICD_1405</b>   | 2001 | Republic of South Africa | Africa | ERR1880777 | NICD_1405                |  | Weill et al. Science 2017 |
| <b>NICD_1264</b>   | 2001 | Republic of South Africa | Africa | ERR1880776 | NICD_1264                |  | Weill et al. Science 2017 |
| <b>NICD_1242</b>   | 2001 | Republic of South Africa | Africa | ERR1880775 | NICD_1242                |  | Weill et al. Science 2017 |
| <b>NICD_1241</b>   | 2001 | Republic of South Africa | Africa | ERR1880774 | NICD_1241                |  | Weill et al. Science 2017 |
| <b>F8479</b>       | 2002 | Republic of South Africa | Africa | ERR1880769 | CDCF8479                 |  | Weill et al. Science 2017 |
| <b>F8478</b>       | 2002 | Republic of South Africa | Africa | ERR1880768 | CDCF8478                 |  | Weill et al. Science 2017 |
| <b>CNRVC990256</b> | 1999 | Republic of the Congo    | Africa | ERR1879647 | CNRVC990256_GTGGCC_L001  |  | Weill et al. Science 2017 |
| <b>CNRVC070012</b> | 2007 | Republic of the Congo    | Africa | ERR1878550 | CNRVC070012              |  | Weill et al. Science 2017 |
| <b>CNRVC070011</b> | 2007 | Republic of the Congo    | Africa | ERR1878549 | CNRVC070011              |  | Weill et al. Science 2017 |
| <b>CNRVC980034</b> | 1998 | Republic of the Congo    | Africa | ERR976560  | 16244_8_14               |  | Weill et al. Science 2017 |
| <b>CNRVC980030</b> | 1998 | Republic of the Congo    | Africa | ERR976559  | 16244_8_13               |  | Weill et al. Science 2017 |
| <b>CNRVC940047</b> | 1991 | Romania                  | Europe | ERR1879574 | CNRVC940047_GATCAG_L002  |  | Weill et al. Science 2017 |
| <b>CNRVC150224</b> | 1990 | Romania                  | Europe | ERR1879433 | CNRVC150224_ATTCTCT_L001 |  | Weill et al. Science 2017 |
| <b>CNRVC150222</b> | 1987 | Romania                  | Europe | ERR1879431 | CNRVC150222_ACTGAT_L001  |  | Weill et al. Science 2017 |
| <b>CNRVC150221</b> | 1991 | Romania                  | Europe | ERR1879430 | CNRVC150221_GGTAGC_L001  |  | Weill et al. Science 2017 |
| <b>CNRVC150219</b> | 1994 | Romania                  | Europe | ERR1879393 | CNRVC150219_CGTACG_L001  |  | Weill et al. Science 2017 |
| <b>CNRVC150214</b> | 1981 | Romania                  | Europe | ERR1879388 | CNRVC150214_GTAGAG_L001  |  | Weill et al. Science 2017 |
| <b>CNRVC150134</b> | 1990 | Russian Federation       | Europe | ERR1878616 | 150134_S11               |  | Weill et al. Science 2017 |

|                    |      |                    |        |            |                             |                           |
|--------------------|------|--------------------|--------|------------|-----------------------------|---------------------------|
| <b>CNRVC150133</b> | 1990 | Russian Federation | Europe | ERR1878615 | 150133_S10                  | Weill et al. Science 2017 |
| <b>CNRVC000212</b> | 2000 | Rwanda             | Africa | ERR1877642 | CNRVC000212_ACAGTG_L001     | Weill et al. Science 2017 |
| <b>CNRVC000209</b> | 2000 | Rwanda             | Africa | ERR1877641 | CNRVC000209                 | Weill et al. Science 2017 |
| <b>B9632</b>       | 1998 | Rwanda             | Africa | ERR1877615 | CDCB9632_rep                | Weill et al. Science 2017 |
| <b>B9631</b>       | 1998 | Rwanda             | Africa | ERR1877614 | CDCB9631_rep                | Weill et al. Science 2017 |
| <b>CNRVC960329</b> | 1996 | Rwanda             | Africa | ERR998722  | 16356_8_67                  | Weill et al. Science 2017 |
| <b>CNRVC960328</b> | 1996 | Rwanda             | Africa | ERR998721  | 16356_8_66                  | Weill et al. Science 2017 |
| <b>CNRVC960317</b> | 1996 | Rwanda             | Africa | ERR998716  | 16356_8_61                  | Weill et al. Science 2017 |
| <b>CNRVC960312</b> | 1996 | Rwanda             | Africa | ERR998715  | 16356_8_60                  | Weill et al. Science 2017 |
| <b>CNRVC960299</b> | 1996 | Rwanda             | Africa | ERR998713  | 16356_8_58                  | Weill et al. Science 2017 |
| <b>CNRVC980324</b> | 1998 | Rwanda             | Africa | ERR976569  | 16244_8_23                  | Weill et al. Science 2017 |
| <b>CNRVC980195</b> | 1998 | Rwanda             | Africa | ERR976567  | 16244_8_21                  | Weill et al. Science 2017 |
| <b>CNRVC980194</b> | 1998 | Rwanda             | Africa | ERR976566  | 16244_8_20                  | Weill et al. Science 2017 |
| <b>CNRVC930409</b> | 1993 | Rwanda             | Africa | ERR976528  | 16244_7_77                  | Weill et al. Science 2017 |
| <b>CNRVC940051</b> | 1988 | Rwanda             | Africa | ERR976414  | 16244_6_57                  | Weill et al. Science 2017 |
| <b>SaoTome21</b>   | 1989 | Sao Tome           | Africa | ERR1880798 | Sao_Tome_21_TGACCA_L001_rep | Weill et al. Science 2017 |
| <b>CNRVC920176</b> | 1989 | Sao Tome           | Africa | ERR1879552 | CNRVC920176_ATCACG_L001     | Weill et al. Science 2017 |
| <b>CNRVC950340</b> | 1974 | Senegal            | Africa | ERR1879586 | CNRVC950340_CGTACG_L002     | Weill et al. Science 2017 |
| <b>CNRVC150226</b> | 1994 | Senegal            | Africa | ERR1879434 | CNRVC150226_CAACTA_L001     | Weill et al. Science 2017 |
| <b>CNRVC040314</b> | 2004 | Senegal            | Africa | ERR1878127 | CNRVC040314                 | Weill et al. Science 2017 |
| <b>CNRVC040303</b> | 2004 | Senegal            | Africa | ERR1878117 | CNRVC040303                 | Weill et al. Science 2017 |
| <b>CNRVC960327</b> | 1996 | Senegal            | Africa | ERR998720  | 16356_8_65                  | Weill et al. Science 2017 |
| <b>CNRVC960324</b> | 1996 | Senegal            | Africa | ERR998719  | 16356_8_64                  | Weill et al. Science 2017 |
| <b>CNRVC960321</b> | 1996 | Senegal            | Africa | ERR998718  | 16356_8_63                  | Weill et al. Science 2017 |
| <b>CNRVC960318</b> | 1996 | Senegal            | Africa | ERR998717  | 16356_8_62                  | Weill et al. Science 2017 |
| <b>CNRVC960272</b> | 1996 | Senegal            | Africa | ERR998710  | 16356_8_55                  | Weill et al. Science 2017 |
| <b>CNRVC960122</b> | 1996 | Senegal            | Africa | ERR998695  | 16356_8_40                  | Weill et al. Science 2017 |
| <b>CNRVC960031</b> | 1996 | Senegal            | Africa | ERR998693  | 16356_8_38                  | Weill et al. Science 2017 |

|                     |      |              |        |            |                          |  |                           |
|---------------------|------|--------------|--------|------------|--------------------------|--|---------------------------|
| <b>CNRVC960023</b>  | 1996 | Senegal      | Africa | ERR998691  | 16356_8_36               |  | Weill et al. Science 2017 |
| <b>CNRVC960018</b>  | 1996 | Senegal      | Africa | ERR998690  | 16356_8_35               |  | Weill et al. Science 2017 |
| <b>CNRVC950345</b>  | 1971 | Senegal      | Africa | ERR976436  | 16244_6_79               |  | Weill et al. Science 2017 |
| <b>CNRVC950343</b>  | 1972 | Senegal      | Africa | ERR976435  | 16244_6_78               |  | Weill et al. Science 2017 |
| <b>CNRVC950326</b>  | 1974 | Senegal      | Africa | ERR976434  | 16244_6_77               |  | Weill et al. Science 2017 |
| <b>CNRVC950253</b>  | 1973 | Senegal      | Africa | ERR976433  | 16244_6_76               |  | Weill et al. Science 2017 |
| <b>CNRVC040257</b>  | 2004 | Sierra Leone | Africa | ERR1878115 | CNRVC040257              |  | Weill et al. Science 2017 |
| <b>CNRVC040203</b>  | 2004 | Sierra Leone | Africa | ERR1878111 | CNRVC040203              |  | Weill et al. Science 2017 |
| <b>CNRVC950712</b>  | 1995 | Sierra Leone | Africa | ERR998675  | 16356_8_20               |  | Weill et al. Science 2017 |
| <b>CNRVC980418</b>  | 1998 | Sierra Leone | Africa | ERR976580  | 16244_8_34               |  | Weill et al. Science 2017 |
| <b>CNRVC980038</b>  | 1986 | Sierra Leone | Africa | ERR976477  | 16244_7_26               |  | Weill et al. Science 2017 |
| <b>CNRVC961014</b>  | 1970 | Sierra Leone | Africa | ERR976475  | 16244_7_24               |  | Weill et al. Science 2017 |
| <b>CNRVC930037</b>  | 1970 | Sierra Leone | Africa | ERR976398  | 16244_6_41               |  | Weill et al. Science 2017 |
| <b>CNRVC961018</b>  | 1970 | Slovakia     | Europe | ERR1879632 | 961018_S2                |  | Weill et al. Science 2017 |
| <b>CNRVC961017</b>  | 1970 | Slovakia     | Europe | ERR1879631 | 961017_S1                |  | Weill et al. Science 2017 |
| <b>CNRVC930030</b>  | 1970 | Slovakia     | Europe | ERR1879560 | 930030_S3                |  | Weill et al. Science 2017 |
| <b>CNRVC940066</b>  | 1994 | Somalia      | Africa | ERR1879575 | CNRVC940066_TAGCTT_L002  |  | Weill et al. Science 2017 |
| <b>CNRVC150236</b>  | 1985 | Somalia      | Africa | ERR1879537 | CNRVC150236_CCAACA_L001  |  | Weill et al. Science 2017 |
| <b>CNRVC150234</b>  | 1985 | Somalia      | Africa | ERR1879536 | CNRVC150234_CATTTT_L001  |  | Weill et al. Science 2017 |
| <b>CNRVC030392</b>  | 2003 | Somalia      | Africa | ERR1878095 | CNRVC030392              |  | Weill et al. Science 2017 |
| <b>CNRVC030391</b>  | 2003 | Somalia      | Africa | ERR1878094 | CNRVC030391              |  | Weill et al. Science 2017 |
| <b>CNRVC970053</b>  | 1997 | Somalia      | Africa | ERR998732  | 16356_8_77               |  | Weill et al. Science 2017 |
| <b>CNRVC990002</b>  | 1999 | Somalia      | Africa | ERR976583  | 16244_8_37               |  | Weill et al. Science 2017 |
| <b>CNRVC080383</b>  | 2008 | South Sudan  | Africa | ERR1878569 | CNRVC080383              |  | Weill et al. Science 2017 |
| <b>CNRVC070067</b>  | 2007 | South Sudan  | Africa | ERR1878554 | CNRVC070067              |  | Weill et al. Science 2017 |
| <b>CNRVC070066</b>  | 2007 | South Sudan  | Africa | ERR1878553 | CNRVC070066              |  | Weill et al. Science 2017 |
| <b>RKI-ZBS2-CH8</b> | 1971 | Spain        | Europe | ERR1880796 | RKI-ZBS2-CH8_CTCAGA_L002 |  | Weill et al. Science 2017 |
| <b>CNRVC930174</b>  | 1981 | Sri Lanka    | Asia   | ERR1879571 | CNRVC930174_CTTGTA_L002  |  | Weill et al. Science 2017 |

|                        |      |          |        |            |                                      |                           |
|------------------------|------|----------|--------|------------|--------------------------------------|---------------------------|
| <b>CNRVC960276</b>     | 1996 | Sudan    | Africa | ERR1879600 | CNRVC960276_ATTCTCT_L002             | Weill et al. Science 2017 |
| <b>CNRVC960142</b>     | 1996 | Sudan    | Africa | ERR1879595 | CNRVC960142_GGTAGC_L002              | Weill et al. Science 2017 |
| <b>CNRVC980384</b>     | 1998 | Sudan    | Africa | ERR976575  | 16244_8_29                           | Weill et al. Science 2017 |
| <b>CNRVC980356</b>     | 1998 | Sudan    | Africa | ERR976571  | 16244_8_25                           | Weill et al. Science 2017 |
| <b>CNRVC150212</b>     | 1998 | Tanzania | Africa | ERR1879386 | CNRVC150212_ATGTCA_L001              | Weill et al. Science 2017 |
| <b>F5333</b>           | 1998 | Tanzania | Africa | ERR1880767 | CDCF5333                             | Weill et al. Science 2017 |
| <b>F5332</b>           | 1998 | Tanzania | Africa | ERR1880766 | CDCF5332                             | Weill et al. Science 2017 |
| <b>F3835</b>           | 1997 | Tanzania | Africa | ERR1879655 | CDCF3835                             | Weill et al. Science 2017 |
| <b>CNRVC980081</b>     | 1998 | Tanzania | Africa | ERR976564  | 16244_8_18                           | Weill et al. Science 2017 |
| <b>CNRVC980080</b>     | 1998 | Tanzania | Africa | ERR976563  | 16244_8_17                           | Weill et al. Science 2017 |
| <b>CNRVC930428</b>     | 1993 | Tanzania | Africa | ERR976531  | 16244_7_80                           | Weill et al. Science 2017 |
| <b>CNRVC961077</b>     | 1963 | Thailand | Asia   | ERR1879633 | CNRVC961077exCNRVC961090_TCGAAG_L001 | Weill et al. Science 2017 |
| <b>CNRVC930155</b>     | 1993 | Thailand | Asia   | ERR1879570 | CNRVC930155_TCGGCA_L002              | Weill et al. Science 2017 |
| <b>THSTI_GP106 bis</b> | 1975 | Togo     | Africa | ERR1880815 | THSTI_GP106bis                       | Weill et al. Science 2017 |
| <b>CNRVC010108</b>     | 2001 | Togo     | Africa | ERR1877944 | CNRVC010108                          | Weill et al. Science 2017 |
| <b>L409</b>            | 2012 | Togo     | Africa | ERR572842  | 12971_7_80                           | Weill et al. Science 2017 |
| <b>L400</b>            | 2011 | Togo     | Africa | ERR572840  | 12971_7_78                           | Weill et al. Science 2017 |
| <b>L395</b>            | 2010 | Togo     | Africa | ERR572839  | 12971_7_77                           | Weill et al. Science 2017 |
| <b>L413</b>            | 2012 | Togo     | Africa | ERR572592  | 12971_4_79                           | Weill et al. Science 2017 |
| <b>L410</b>            | 2012 | Togo     | Africa | ERR572590  | 12971_4_77                           | Weill et al. Science 2017 |
| <b>L408</b>            | 2011 | Togo     | Africa | ERR572589  | 12971_4_76                           | Weill et al. Science 2017 |
| <b>L403</b>            | 2011 | Togo     | Africa | ERR572585  | 12971_4_72                           | Weill et al. Science 2017 |
| <b>L399</b>            | 2011 | Togo     | Africa | ERR572582  | 12971_4_69                           | Weill et al. Science 2017 |
| <b>L397</b>            | 2010 | Togo     | Africa | ERR572580  | 12971_4_67                           | Weill et al. Science 2017 |
| <b>L390</b>            | 2010 | Togo     | Africa | ERR572574  | 12971_4_61                           | Weill et al. Science 2017 |
| <b>L388</b>            | 2010 | Togo     | Africa | ERR572572  | 12971_4_59                           | Weill et al. Science 2017 |
| <b>L387</b>            | 2010 | Togo     | Africa | ERR572571  | 12971_4_58                           | Weill et al. Science 2017 |
| <b>CNRVC150229</b>     | 1981 | Tunisia  | Africa | ERR1879437 | CNRVC150229_CACTCA_L001              | Weill et al. Science 2017 |

|                       |      |         |        |            |                             |                           |
|-----------------------|------|---------|--------|------------|-----------------------------|---------------------------|
| <b>CNRVC150228</b>    | 1973 | Tunisia | Africa | ERR1879436 | CNRVC150228_CACGAT_L001     | Weill et al. Science 2017 |
| <b>CNRVC950559</b>    | 1971 | Tunisia | Africa | ERR976455  | 16244_7_4                   | Weill et al. Science 2017 |
| <b>CNRVC950558</b>    | 1971 | Tunisia | Africa | ERR976454  | 16244_7_3                   | Weill et al. Science 2017 |
| <b>CNRVC950376</b>    | 1974 | Tunisia | Africa | ERR976441  | 16244_6_84                  | Weill et al. Science 2017 |
| <b>RKI-ZBS2-CH99</b>  | 1980 | Turkey  | Asia   | ERR1880797 | RKI-ZBS2-CH99_TAATCG_L002   | Weill et al. Science 2017 |
| <b>RKI-ZBS2-CH234</b> | 1994 | Turkey  | Asia   | ERR1880795 | RKI-ZBS2-CH234_TCATTTC_L002 | Weill et al. Science 2017 |
| <b>RKI-ZBS2-CH218</b> | 1994 | Turkey  | Asia   | ERR1880794 | RKI-ZBS2-CH218_TATAAT_L002  | Weill et al. Science 2017 |
| <b>CNRVC910164</b>    | 1991 | Turkey  | Asia   | ERR1879549 | CNRVC910164_CTTGTA_L001     | Weill et al. Science 2017 |
| <b>CNRVC150216</b>    | 1976 | Turkey  | Asia   | ERR1879390 | CNRVC150216_GTGAAA_L001     | Weill et al. Science 2017 |
| <b>CNRVC000044</b>    | 2000 | Uganda  | Africa | ERR1877639 | CNRVC000044_TGACCA_L001     | Weill et al. Science 2017 |
| <b>CNRVC000043</b>    | 2000 | Uganda  | Africa | ERR1877638 | CNRVC000043                 | Weill et al. Science 2017 |
| <b>C8799</b>          | 1992 | Uganda  | Africa | ERR1877636 | CDCC8799_rep                | Weill et al. Science 2017 |
| <b>C8798</b>          | 1992 | Uganda  | Africa | ERR1877619 | CDCC8798_rep                | Weill et al. Science 2017 |
| <b>CNRVC980005</b>    | 1998 | Uganda  | Africa | ERR976553  | 16244_8_7                   | Weill et al. Science 2017 |
| <b>CNRVC980004</b>    | 1998 | Uganda  | Africa | ERR976552  | 16244_8_6                   | Weill et al. Science 2017 |
| <b>CNRVC990015</b>    | 1999 | Uganda  | Africa | ERR976584  | 16244_8_38                  | Weill et al. Science 2017 |
| <b>CNRVC150132</b>    | 1974 | Ukraine | Europe | ERR1878614 | 150132_S9                   | Weill et al. Science 2017 |
| <b>CNRVC150131</b>    | 1970 | Ukraine | Europe | ERR1878613 | 150131_S8                   | Weill et al. Science 2017 |
| <b>CNRVC920171</b>    | 1983 | Vietnam | Asia   | ERR1879551 | CNRVC920171_TACAGC_L001     | Weill et al. Science 2017 |
| <b>CNRVC961129</b>    | 1964 | Vietnam | Asia   | ERR1879634 | CNRVC961129_CAGGCG_L002     | Weill et al. Science 2017 |
| <b>CNRVC950172</b>    | 1969 | Vietnam | Asia   | ERR1879583 | CNRVC950172_GTGAAA_L002     | Weill et al. Science 2017 |
| <b>CNRVC950165</b>    | 1968 | Vietnam | Asia   | ERR1879582 | CNRVC950165_GTCCGC_L002     | Weill et al. Science 2017 |
| <b>CNRVC950161</b>    | 1966 | Vietnam | Asia   | ERR1879581 | CNRVC950161_GTAGAG_L002     | Weill et al. Science 2017 |
| <b>CNRVC100062</b>    | 2010 | Zambia  | Africa | ERR1878582 | CNRVC100062                 | Weill et al. Science 2017 |
| <b>CNRVC100057</b>    | 2010 | Zambia  | Africa | ERR1878581 | CNRVC100057                 | Weill et al. Science 2017 |
| <b>F5198</b>          | 1998 | Zambia  | Africa | ERR1880765 | CDCF5198                    | Weill et al. Science 2017 |
| <b>F5197</b>          | 1998 | Zambia  | Africa | ERR1880764 | CDCF5197                    | Weill et al. Science 2017 |

|        |      |                                 |        |            |            |                           |
|--------|------|---------------------------------|--------|------------|------------|---------------------------|
| 336_01 | 2004 | Zambia                          | Africa | ERR164776  | 8036_3_36  | Weill et al. Science 2017 |
| 259_01 | 2004 | Zambia                          | Africa | ERR164773  | 8036_3_33  | Weill et al. Science 2017 |
| 329_01 | 2004 | Zambia                          | Africa | ERR164768  | 8036_3_28  | Weill et al. Science 2017 |
| 218_02 | 2003 | Zambia                          | Africa | ERR164766  | 8036_3_26  | Weill et al. Science 2017 |
| 169_12 | 2003 | Zambia                          | Africa | ERR164765  | 8036_3_25  | Weill et al. Science 2017 |
| 20_03  | 1997 | Zambia                          | Africa | ERR164763  | 8036_3_23  | Weill et al. Science 2017 |
| 330_02 | 1997 | Zambia                          | Africa | ERR164760  | 8036_3_20  | Weill et al. Science 2017 |
| 177_03 | 1997 | Zambia                          | Africa | ERR164759  | 8036_3_19  | Weill et al. Science 2017 |
| 329_02 | 1996 | Zambia                          | Africa | ERR164758  | 8036_3_18  | Weill et al. Science 2017 |
| 280_02 | 1996 | Zambia                          | Africa | ERR164757  | 8036_3_17  | Weill et al. Science 2017 |
| 204_12 | 2003 | Zambia                          | Africa | ERR044795  | 6437_7_18  | Weill et al. Science 2017 |
| 354_02 | 1996 | Zambia                          | Africa | ERR044794  | 6437_7_17  | Weill et al. Science 2017 |
| L254   | 2012 | Zambia                          | Africa | ERR386663  | 10868_2_44 | Weill et al. Science 2017 |
| L268   | 2012 | Zambia                          | Africa | ERR386661  | 10868_2_42 | Weill et al. Science 2017 |
| L273   | 2012 | Zambia                          | Africa | ERR386656  | 10868_2_37 | Weill et al. Science 2017 |
| F3403  | 1996 | Zambia_Republic of South Africa | Africa | ERR1879654 | CDCF3403   | Weill et al. Science 2017 |
| F3397  | 1996 | Zambia_Republic of South Africa | Africa | ERR1879653 | CDCF3397   | Weill et al. Science 2017 |
| Zim_27 | 2009 | Zimbabwe                        | Africa | ERR044800  | 6437_7_23  | Weill et al. Science 2017 |
| Zim_25 | 2009 | Zimbabwe                        | Africa | ERR044799  | 6437_7_22  | Weill et al. Science 2017 |
| Zim_12 | 2009 | Zimbabwe                        | Africa | ERR044798  | 6437_7_21  | Weill et al. Science 2017 |

**Supplementary Table 4**  
**Toxigenic O1 *Vibrio cholerae* genomes and accessions used in Figure 1.**

## References

1. Iwanaga M, Yamamoto K, Higa N, Ichinose Y, Nakasone N, Tanabe M. Culture conditions for stimulating cholera toxin production by *Vibrio cholerae* O1 El Tor. *Microbiol Immunol* 1986;30(11):1075-83. (In eng). DOI: 10.1111/j.1348-0421.1986.tb03037.x.
2. Fakoya B, Hullahalli K, Rubin DHF, et al. Nontoxigenic *Vibrio cholerae* Challenge Strains for Evaluating Vaccine Efficacy and Inferring Mechanisms of Protection. *mBio* 2022;13(2):e0053922. (In eng). DOI: 10.1128/mbio.00539-22.
3. Abd El Ghany M, Chander J, Mutreja A, et al. The population structure of *Vibrio cholerae* from the Chandigarh Region of Northern India. *PLoS Negl Trop Dis* 2014;8(7):e2981. (In eng). DOI: 10.1371/journal.pntd.0002981.
4. Bwire G, Sack DA, Almeida M, et al. Molecular characterization of *Vibrio cholerae* responsible for cholera epidemics in Uganda by PCR, MLVA and WGS. *PLoS Negl Trop Dis* 2018;12(6):e0006492. (In eng). DOI: 10.1371/journal.pntd.0006492.
5. Chin CS, Sorenson J, Harris JB, et al. The origin of the Haitian cholera outbreak strain. *The New England journal of medicine* 2011;364(1):33-42. (In eng). DOI: 10.1056/NEJMoa1012928.
6. Chun J, Grim CJ, Hasan NA, et al. Comparative genomics reveals mechanism for short-term and long-term clonal transitions in pandemic *Vibrio cholerae*. *Proc Natl Acad Sci U S A* 2009;106(36):15442-7. (In eng). DOI: 10.1073/pnas.0907787106.
7. Didelot X, Pang B, Zhou Z, et al. The role of China in the global spread of the current cholera pandemic. *PLoS Genet* 2015;11(3):e1005072. (In eng). DOI: 10.1371/journal.pgen.1005072.
8. Domman D, Quilici ML, Dorman MJ, et al. Integrated view of *Vibrio cholerae* in the Americas. *Science (New York, NY)* 2017;358(6364):789-793. (In eng). DOI: 10.1126/science.aao2136.
9. Garrine M, Mandomando I, Vubil D, et al. Minimal genetic change in *Vibrio cholerae* in Mozambique over time: Multilocus variable number tandem repeat analysis and whole genome sequencing. *PLoS Negl Trop Dis* 2017;11(6):e0005671. (In eng). DOI: 10.1371/journal.pntd.0005671.
10. Hasan NA, Choi SY, Eppinger M, et al. Genomic diversity of 2010 Haitian cholera outbreak strains. *Proc Natl Acad Sci U S A* 2012;109(29):E2010-7. (In eng). DOI: 10.1073/pnas.1207359109.
11. Heidelberg JF, Eisen JA, Nelson WC, et al. DNA sequence of both chromosomes of the cholera pathogen *Vibrio cholerae*. *Nature* 2000;406(6795):477-83. (In eng). DOI: 10.1038/35020000.
12. Hendriksen RS, Price LB, Schupp JM, et al. Population genetics of *Vibrio cholerae* from Nepal in 2010: evidence on the origin of the Haitian outbreak. *mBio* 2011;2(4):e00157-11. (In eng). DOI: 10.1128/mBio.00157-11.



13. Kachwamba Y, Mohammed AA, Lukupulo H, et al. Genetic Characterization of *Vibrio cholerae* O1 isolates from outbreaks between 2011 and 2015 in Tanzania. *BMC Infect Dis* 2017;17(1):157. (In eng). DOI: 10.1186/s12879-017-2252-9.
14. Katz LS, Petkau A, Beaulaurier J, et al. Evolutionary dynamics of *Vibrio cholerae* O1 following a single-source introduction to Haiti. *mBio* 2013;4(4) (In eng). DOI: 10.1128/mBio.00398-13.
15. Kiiru J, Mutreja A, Mohamed AA, et al. A study on the geophylogeny of clinical and environmental *Vibrio cholerae* in Kenya. *PloS one* 2013;8(9):e74829. (In eng). DOI: 10.1371/journal.pone.0074829.
16. Mashe T, Domman D, Tarupiwa A, et al. Highly Resistant Cholera Outbreak Strain in Zimbabwe. *The New England journal of medicine* 2020;383(7):687-689. (In eng). DOI: 10.1056/NEJMc2004773.
17. Mutreja A, Kim DW, Thomson NR, et al. Evidence for several waves of global transmission in the seventh cholera pandemic. *Nature* 2011;477(7365):462-5. (In eng). DOI: 10.1038/nature10392.
18. Reimer AR, Van Domselaar G, Stroika S, et al. Comparative genomics of *Vibrio cholerae* from Haiti, Asia, and Africa. *Emerging infectious diseases* 2011;17(11):2113-21. (In eng). DOI: 10.3201/eid1711.110794.
19. Shah MA, Mutreja A, Thomson N, et al. Genomic epidemiology of *Vibrio cholerae* O1 associated with floods, Pakistan, 2010. *Emerging infectious diseases* 2014;20(1):13-20. (In eng). DOI: 10.3201/.eid2001.130428.
20. Weill FX, Domman D, Njamkepo E, et al. Genomic insights into the 2016-2017 cholera epidemic in Yemen. *Nature* 2019;565(7738):230-233. (In eng). DOI: 10.1038/s41586-018-0818-3.
21. Weill FX, Domman D, Njamkepo E, et al. Genomic history of the seventh pandemic of cholera in Africa. *Science (New York, NY)* 2017;358(6364):785-789. (In eng). DOI: 10.1126/science.aad5901.
22. Mavian C, Paisie TK, Alam MT, et al. Toxigenic *Vibrio cholerae* evolution and establishment of reservoirs in aquatic ecosystems. *Proc Natl Acad Sci U S A* 2020;117(14):7897-7904. (In eng). DOI: 10.1073/pnas.1918763117.
23. Dorman MJ, Domman D, Poklepovich T, et al. Genomics of the Argentinian cholera epidemic elucidate the contrasting dynamics of epidemic and endemic *Vibrio cholerae*. *Nature communications* 2020;11(1):4918. (In eng). DOI: 10.1038/s41467-020-18647-7.
24. Croucher NJ, Page AJ, Connor TR, et al. Rapid phylogenetic analysis of large samples of recombinant bacterial whole genome sequences using Gubbins. *Nucleic acids research* 2015;43(3):e15. (In eng). DOI: 10.1093/nar/gku1196.
25. Stamatakis A. RAxML version 8: a tool for phylogenetic analysis and post-analysis of large phylogenies. *Bioinformatics* 2014;30(9):1312-3. (In eng). DOI: 10.1093/bioinformatics/btu033.
26. Letunic I, Bork P. Interactive Tree Of Life (iTOL) v5: an online tool for phylogenetic tree display and annotation. *Nucleic acids research* 2021;49(W1):W293-w296. (In eng). DOI: 10.1093/nar/gkab301.
27. Pribelski A, Antipov D, Meleshko D, Lapidus A, Korobeynikov A. Using SPAdes De Novo Assembler. *Curr Protoc Bioinformatics* 2020;70(1):e102. (In eng). DOI: 10.1002/cpbi.102.

28. NCBI Resource Coordinators. Database resources of the National Center for Biotechnology Information. *Nucleic acids research* 2016;44(D1):D7-19. (In eng). DOI: 10.1093/nar/gkv1290.
